# Supplementary material for: A New Advanced <em>In silico</em> Drug Discovery Method for Novel Coronavirus (SARS-CoV-2) with Tensor Decomposition-based Unsupervised Feature Extraction
Source: Preprints.org preprint supplement (doi:10.20944/preprints202004.0524.v2), 2020-06-03
Supplement: Supplementary file 1 [file supplementary]

Table S1: Virus proteins that significantly interact with the 163 genes selected by TD based unsupervised FE and enriched by “Virus-Host PPI P-HIPSTer 2020” in Enrichr

| Term                                                                         | Overlap | P-value                | Adjusted P-value       |
|------------------------------------------------------------------------------|---------|------------------------|------------------------|
| SARS coronavirus excised_polyprotein 1..4369 (gene: orf1ab)                  | 12/194  | $6.67 \times 10^{-8}$  | $2.38 \times 10^{-6}$  |
| SARS coronavirus P2 full_polyprotein 1..4382                                 | 12/198  | $8.35 \times 10^{-8}$  | $2.76 \times 10^{-6}$  |
| SARS coronavirus hypothetical protein sars9b                                 | 4/17    | $9.31 \times 10^{-6}$  | $7.57 \times 10^{-5}$  |
| SARS coronavirus P2 hypothetical protein sars9b                              | 4/17    | $9.31 \times 10^{-6}$  | $7.562 \times 10^{-5}$ |
| SARS coronavirus Tor2 Orf13                                                  | 4/17    | $9.31 \times 10^{-6}$  | $7.55 \times 10^{-5}$  |
| SARS coronavirus nsp7-pp1a/pp1ab (gene: orf1ab)                              | 5/36    | $1.038 \times 10^{-5}$ | $8.18 \times 10^{-5}$  |
| SARS coronavirus 3C-like proteinase (gene: orf1ab)                           | 4/19    | $1.49 \times 10^{-5}$  | $1.10 \times 10^{-4}$  |
| SARS coronavirus nucleocapsid protein (gene: N)                              | 4/29    | $8.61 \times 10^{-5}$  | $4.23 \times 10^{-4}$  |
| SARS coronavirus P2 nucleocapsid protein                                     | 4/29    | $8.61 \times 10^{-5}$  | $4.23 \times 10^{-4}$  |
| SARS coronavirus Tor2 nucleocapsid protein                                   | 4/29    | $8.61 \times 10^{-5}$  | $4.22 \times 10^{-4}$  |
| SARS coronavirus nsp4-pp1a/pp1ab (gene: orf1ab)                              | 3/16    | $2.75 \times 10^{-4}$  | $9.89 \times 10^{-4}$  |
| SARS coronavirus formerly known as growth-factor-like protein (gene: orf1ab) | 3/17    | $3.32 \times 10^{-4}$  | $1.14 \times 10^{-3}$  |
| SARS coronavirus nsp8-pp1a/pp1ab (gene: orf1ab)                              | 4/45    | $4.88 \times 10^{-4}$  | $1.50 \times 10^{-3}$  |
| SARS coronavirus leader protein (gene: orf1ab)                               | 3/20    | $5.47 \times 10^{-4}$  | $1.61 \times 10^{-3}$  |
| SARS coronavirus RNA-dependent RNA polymerase (gene: orf1ab)                 | 2/9     | $2.28 \times 10^{-3}$  | $5.26 \times 10^{-3}$  |
| SARS coronavirus P2 spike glycoprotein precursor                             | 4/71    | $2.70 \times 10^{-3}$  | $6.08 \times 10^{-3}$  |
| SARS coronavirus nsp3-pp1a/pp1ab (gene: orf1ab)                              | 5/118   | $2.82 \times 10^{-3}$  | $6.34 \times 10^{-3}$  |
| SARS coronavirus E2 glycoprotein precursor (gene: S)                         | 4/72    | $2.84 \times 10^{-3}$  | $6.38 \times 10^{-3}$  |
| SARS coronavirus Tor2 spike glycoprotein                                     | 4/72    | $2.84 \times 10^{-3}$  | $6.38 \times 10^{-3}$  |
| SARS coronavirus 2-O-ribose methyltransferase (2-o-MT) (gene: orf1ab)        | 2/11    | $3.45 \times 10^{-3}$  | $7.26 \times 10^{-3}$  |
| SARS coronavirus hypothetical protein sars7a                                 | 3/38    | $3.63 \times 10^{-3}$  | $7.59 \times 10^{-3}$  |
| SARS coronavirus P2 hypothetical protein sars7a                              | 3/38    | $3.63 \times 10^{-3}$  | $7.58 \times 10^{-3}$  |
| SARS coronavirus Tor2 Orf8                                                   | 3/38    | $3.63 \times 10^{-3}$  | $7.58 \times 10^{-3}$  |
| SARS coronavirus nsp9-pp1a/pp1ab (gene: orf1ab)                              | 2/13    | $4.85 \times 10^{-3}$  | $9.45 \times 10^{-3}$  |
| SARS coronavirus nsp13-pp1ab (ZD, NTPase/HEL; RNA (gene: orf1ab)             | 2/14    | $5.63 \times 10^{-3}$  | $1.06 \times 10^{-2}$  |
| SARS coronavirus Tor2 replicase 1AB                                          | 4/108   | $1.18 \times 10^{-2}$  | $1.94 \times 10^{-2}$  |
| SARS coronavirus P2 full_polyprotein 1..7073                                 | 4/109   | $1.22 \times 10^{-2}$  | $2.00 \times 10^{-2}$  |

Table S2: Genes whose expression is altered by SARS-CoV-2-related viruses that significantly interact with the 163 genes selected by TD based unsupervised FE and enriched by “Virus Perturbations from GEO up” in Enrichr

| Term                                            | Overlap | P-value               | Adjusted P-value      |
|-------------------------------------------------|---------|-----------------------|-----------------------|
| SARS-BatSRBD 48Hour GSE47960                    | 11/300  | $3.66 \times 10^{-5}$ | $1.48 \times 10^{-3}$ |
| SARS-CoV 12Hour GSE17400                        | 11/300  | $3.66 \times 10^{-5}$ | $1.31 \times 10^{-3}$ |
| SARS-CoV 48Hour GSE47961                        | 11/300  | $3.66 \times 10^{-5}$ | $1.18 \times 10^{-3}$ |
| icSARS CoV 54Hour GSE37827                      | 11/300  | $3.66 \times 10^{-5}$ | $1.08 \times 10^{-3}$ |
| SARS-CoV MA15 Day2 GSE49263                     | 10/300  | $1.82 \times 10^{-4}$ | $3.45 \times 10^{-3}$ |
| SARS-CoV 60Hour GSE47960                        | 10/300  | $1.82 \times 10^{-4}$ | $3.26 \times 10^{-3}$ |
| SARS-CoV 96Hour GSE47961                        | 10/300  | $1.82 \times 10^{-4}$ | $3.09 \times 10^{-3}$ |
| SARS-ddORF6 24Hour GSE47961                     | 10/300  | $1.82 \times 10^{-4}$ | $2.93 \times 10^{-3}$ |
| SARS-BatSRBD 36Hour GSE47960                    | 9/300   | $8.14 \times 10^{-4}$ | $1.05 \times 10^{-2}$ |
| SARS-CoV MA15 Day4-C57BL-6 GSE40824             | 9/300   | $8.14 \times 10^{-4}$ | $1.01 \times 10^{-2}$ |
| SARS-dORF6 72Hour GSE47960                      | 9/300   | $8.14 \times 10^{-4}$ | $9.73 \times 10^{-3}$ |
| SARS-ddORF6 72Hour GSE47961                     | 9/300   | $8.14 \times 10^{-4}$ | $9.39 \times 10^{-3}$ |
| SARS-BatSRBD 84Hour GSE47961                    | 8/300   | $3.27 \times 10^{-3}$ | $2.46 \times 10^{-2}$ |
| SARS-CoV MA15 Day2 GSE49262                     | 8/300   | $3.27 \times 10^{-3}$ | $2.40 \times 10^{-2}$ |
| SARS-CoV MA15 Day4-PFU-10 <sup>5</sup> GSE33266 | 8/300   | $3.27 \times 10^{-3}$ | $2.35 \times 10^{-2}$ |
| SARS-dORF6 84Hour GSE47962                      | 8/300   | $3.27 \times 10^{-3}$ | $2.30 \times 10^{-2}$ |
| cSARS Bat SRBD 24Hour GSE37827                  | 8/300   | $3.27 \times 10^{-3}$ | $2.25 \times 10^{-2}$ |
| cSARS Bat SRBD 60Hour GSE37827                  | 8/300   | $3.27 \times 10^{-3}$ | $2.20 \times 10^{-2}$ |
| icSARS CoV 0Hour GSE37827                       | 8/300   | $3.27 \times 10^{-3}$ | $2.16 \times 10^{-2}$ |
| icSARS CoV 48Hour GSE37827                      | 8/300   | $3.27 \times 10^{-3}$ | $2.11 \times 10^{-2}$ |

Table S3: Genes whose expression was altered by SARS-CoV-2-related viruses that significantly interact with the 163 genes selected by TD-based unsupervised FE and enriched by “Virus Perturbations from GEO down” in Enrichr

| Term                                            | Overlap | P-value               | Adjusted P-value      |
|-------------------------------------------------|---------|-----------------------|-----------------------|
| SARS-CoV 0Hour GSE47961                         | 14/300  | $1.76 \times 10^{-7}$ | $1.42 \times 10^{-5}$ |
| SARS-ddORF6 0Hour GSE47961                      | 10/300  | $1.82 \times 10^{-4}$ | $4.51 \times 10^{-3}$ |
| SARS-BatSRBD 96Hour GSE47960                    | 9/300   | $8.14 \times 10^{-4}$ | $1.38 \times 10^{-2}$ |
| SARS-CoV 24Hour GSE17400                        | 9/300   | $8.14 \times 10^{-4}$ | $1.31 \times 10^{-2}$ |
| cSARS Bat SRBD 60Hour GSE37827                  | 9/300   | $8.14 \times 10^{-4}$ | $1.25 \times 10^{-2}$ |
| icSARS CoV 48Hour GSE37827                      | 9/300   | $8.14 \times 10^{-4}$ | $1.19 \times 10^{-2}$ |
| SARS-CoV MA15 Day4-PFU-10 <sup>2</sup> GSE33266 | 8/300   | $3.27 \times 10^{-3}$ | $3.11 \times 10^{-2}$ |

Table S4: C646 significantly affects the expression of the selected 163 genes as evident in the ‘LINCS L1000 Chem Pert up/down’ category in Enrichr. The last number after the - is dose density.

| Term                       | Overlap | P-value                | Adjusted P-value       |
|----------------------------|---------|------------------------|------------------------|
| LINCS L1000 Chem Pert up   |         |                        |                        |
| LJP008 HEPG2 24H-C646-10   | 21/104  | $1.04 \times 10^{-23}$ | $1.72 \times 10^{-19}$ |
| LJP008 PC3 24H-C646-10     | 11/141  | $2.22 \times 10^{-8}$  | $9.95 \times 10^{-7}$  |
| LJP008 HCC515 24H-C646-10  | 8/63    | $4.34 \times 10^{-8}$  | $1.75 \times 10^{-6}$  |
| LJP008 A549 24H-C646-10    | 6/51    | $3.55 \times 10^{-6}$  | $7.05 \times 10^{-5}$  |
| LJP008 MCF7 24H-C646-10    | 3/45    | $5.87 \times 10^{-3}$  | $3.24 \times 10^{-2}$  |
| LINCS L1000 Chem Pert down |         |                        |                        |
| LJP008 HA1E 24H-C646-10    | 7/96    | $1.36 \times 10^{-5}$  | $2.11 \times 10^{-4}$  |
| LJP008 PC3 24H-C646-10     | 4/59    | $1.37 \times 10^{-3}$  | $1.01 \times 10^{-2}$  |
| LJP008 A375 24H-C646-10    | 4/80    | $4.16 \times 10^{-3}$  | $2.53 \times 10^{-2}$  |
| LJP008 HEPG2 24H-C646-10   | 4/81    | $4.35 \times 10^{-3}$  | $2.62 \times 10^{-2}$  |

Table S5: Chelerythrine chlorid significantly affects the expression of the selected 163 genes as evident in the ‘LINCS L1000 Chem Pert up/down’ category in Enrichr. The last number after the - is dose density.

| Term                                          | Overlap                | P-value                | Adjusted P-value       |
|-----------------------------------------------|------------------------|------------------------|------------------------|
| LINCS L1000 Chem Pert up                      |                        |                        |                        |
| LJP009 MCF7 24H-chelerythrine chloride-10     | $2.01 \times 10^{-23}$ | $2.22 \times 10^{-19}$ |                        |
| LJP009 HEPG2 24H-chelerythrine chloride-3.33  | 16/50                  | $6.92 \times 10^{-22}$ | $4.58 \times 10^{-18}$ |
| LJP009 PC3 24H-chelerythrine chloride-10      | 14/149                 | $2.04 \times 10^{-11}$ | $3.11 \times 10^{-9}$  |
| LJP009 A375 24H-chelerythrine chloride-1.11   | 9/55                   | $5.86 \times 10^{-10}$ | $4.84 \times 10^{-8}$  |
| LJP009 A375 24H-chelerythrine chloride-3.33   | 8/57                   | $1.93 \times 10^{-8}$  | $8.87 \times 10^{-7}$  |
| LJP009 HT29 24H-chelerythrine chloride-10     | 9/94                   | $7.48 \times 10^{-8}$  | $2.82 \times 10^{-6}$  |
| LJP009 HCC515 24H-chelerythrine chloride-10   | 8/71                   | $1.13 \times 10^{-7}$  | $4.00 \times 10^{-6}$  |
| LJP009 HA1E 24H-chelerythrine chloride-3.33   | 5/33                   | $6.67 \times 10^{-6}$  | $1.20 \times 10^{-4}$  |
| LJP009 HCC515 24H-chelerythrine chloride-0.04 | 3/28                   | $1.50 \times 10^{-3}$  | $1.08 \times 10^{-2}$  |
| LJP009 PC3 24H-chelerythrine chloride-1.11    | 3/42                   | $4.83 \times 10^{-3}$  | $2.80 \times 10^{-2}$  |
| LINCS L1000 Chem Pert down                    |                        |                        |                        |
| LJP009 HEPG2 24H-chelerythrine chloride-10    | 14/137                 | $6.46 \times 10^{-12}$ | $1.15 \times 10^{-9}$  |
| LJP009 HCC515 24H-chelerythrine chloride-10   | 8/51                   | $7.74 \times 10^{-9}$  | $3.90 \times 10^{-7}$  |
| LJP009 A375 24H-chelerythrine chloride-1.11   | 5/45                   | $3.17 \times 10^{-5}$  | $4.35 \times 10^{-4}$  |
| LJP009 HEPG2 24H-chelerythrine chloride-3.33  | 3/26                   | $1.20 \times 10^{-3}$  | $9.11 \times 10^{-3}$  |
| LJP009 A375 24H-chelerythrine chloride-3.33   | 3/48                   | $7.03 \times 10^{-3}$  | $3.83 \times 10^{-2}$  |

Table S6: Canertinib significantly affects the expression of the selected 163 genes as evident in the ‘LINCS L1000 Chem Pert up’ category in Enrichr. The last number after the - is dose density.

| Term                                | Overlap | P-value                | Adjusted P-value       |
|-------------------------------------|---------|------------------------|------------------------|
| LINCS L1000 Chem Pert up            |         |                        |                        |
| LJP006 HEPG2 24H-canertinib-10      | 19/96   | $2.29 \times 10^{-21}$ | $1.27 \times 10^{-17}$ |
| LJP006 LNCAP 24H-canertinib-10      | 14/157  | $4.14 \times 10^{-11}$ | $5.70 \times 10^{-9}$  |
| LJP006 HME1 24H-canertinib-0.12     | 12/113  | $1.39 \times 10^{-10}$ | $1.47 \times 10^{-8}$  |
| LJP006 HCC515 24H-canertinib-10     | 11/91   | $2.02 \times 10^{-10}$ | $1.99 \times 10^{-8}$  |
| LJP006 MDAMB231 24H-canertinib-10   | 11/97   | $4.08 \times 10^{-10}$ | $3.56 \times 10^{-8}$  |
| LJP006 HME1 24H-canertinib-3.33     | 9/80    | $1.80 \times 10^{-8}$  | $8.37 \times 10^{-7}$  |
| LJP006 MDAMB231 24H-canertinib-3.33 | 7/39    | $2.59 \times 10^{-8}$  | $1.14 \times 10^{-6}$  |
| LJP006 HME1 24H-canertinib-0.37     | 10/114  | $3.22 \times 10^{-8}$  | $1.36 \times 10^{-6}$  |
| LJP006 LNCAP 3H-canertinib-10       | 7/41    | $3.74 \times 10^{-8}$  | $1.56 \times 10^{-6}$  |
| LJP006 HCC515 24H-canertinib-3.33   | 9/91    | $5.63 \times 10^{-8}$  | $2.21 \times 10^{-6}$  |
| LJP006 HCC515 24H-canertinib-1.11   | 8/77    | $2.14 \times 10^{-7}$  | $6.75 \times 10^{-6}$  |
| LJP006 A375 24H-canertinib-1.11     | 7/53    | $2.36 \times 10^{-7}$  | $7.38 \times 10^{-6}$  |
| LJP006 MCF10A 24H-canertinib-10     | 10/153  | $5.17 \times 10^{-7}$  | $1.42 \times 10^{-5}$  |
| LJP006 BT20 24H-canertinib-10       | 9/123   | $7.57 \times 10^{-7}$  | $1.97 \times 10^{-5}$  |
| LJP006 MCF10A 24H-canertinib-0.04   | 10/163  | $9.26 \times 10^{-7}$  | $2.33 \times 10^{-5}$  |
| LJP006 A375 24H-canertinib-3.33     | 6/53    | $4.47 \times 10^{-6}$  | $8.53 \times 10^{-5}$  |
| LJP006 HME1 3H-canertinib-1.11      | 6/56    | $6.19 \times 10^{-6}$  | $1.13 \times 10^{-4}$  |
| LJP006 BT20 24H-canertinib-1.11     | 7/86    | $6.57 \times 10^{-6}$  | $1.18 \times 10^{-4}$  |
| LJP006 MCF10A 24H-canertinib-0.37   | 8/128   | $1.02 \times 10^{-5}$  | $1.70 \times 10^{-4}$  |
| LJP006 HME1 3H-canertinib-3.33      | 6/64    | $1.36 \times 10^{-5}$  | $2.14 \times 10^{-4}$  |
| LJP006 HA1E 24H-canertinib-3.33     | 5/41    | $2.00 \times 10^{-5}$  | $2.95 \times 10^{-4}$  |
| LJP006 MCF10A 24H-canertinib-3.33   | 8/146   | $2.66 \times 10^{-5}$  | $3.79 \times 10^{-4}$  |
| LJP006 MCF10A 24H-canertinib-0.12   | 8/156   | $4.28 \times 10^{-5}$  | $5.68 \times 10^{-4}$  |
| LJP006 HME1 3H-canertinib-0.12      | 4/26    | $5.53 \times 10^{-5}$  | $7.03 \times 10^{-4}$  |
| LJP006 MDAMB231 3H-canertinib-10    | 5/51    | $5.87 \times 10^{-5}$  | $7.36 \times 10^{-4}$  |
| LJP006 HCC515 24H-canertinib-0.37   | 6/84    | $6.43 \times 10^{-5}$  | $7.95 \times 10^{-4}$  |
| LJP006 MCF10A 24H-canertinib-1.11   | 7/127   | $8.27 \times 10^{-5}$  | $9.81 \times 10^{-4}$  |
| LJP006 HME1 24H-canertinib-1.11     | 7/128   | $8.69 \times 10^{-5}$  | $1.02 \times 10^{-3}$  |
| LJP006 HME1 3H-canertinib-0.37      | 5/59    | $1.19 \times 10^{-4}$  | $1.32 \times 10^{-3}$  |
| LJP006 HME1 24H-canertinib-0.04     | 6/97    | $1.43 \times 10^{-4}$  | $1.55 \times 10^{-3}$  |
| LJP006 PC3 24H-canertinib-10        | 4/35    | $1.83 \times 10^{-4}$  | $1.89 \times 10^{-3}$  |
| LJP006 MCF7 3H-canertinib-10        | 4/37    | $2.28 \times 10^{-4}$  | $2.27 \times 10^{-3}$  |
| LJP006 BT20 3H-canertinib-10        | 4/41    | $3.40 \times 10^{-4}$  | $3.19 \times 10^{-3}$  |
| LJP006 MCF7 24H-canertinib-10       | 5/75    | $3.68 \times 10^{-4}$  | $3.41 \times 10^{-3}$  |
| LJP006 HCC515 24H-canertinib-0.04   | 5/76    | $3.92 \times 10^{-4}$  | $3.59 \times 10^{-3}$  |
| LJP006 HEPG2 24H-canertinib-0.04    | 4/49    | $6.77 \times 10^{-4}$  | $5.68 \times 10^{-3}$  |
| LJP006 HCC515 24H-canertinib-0.12   | 4/53    | $9.12 \times 10^{-4}$  | $7.25 \times 10^{-3}$  |
| LJP006 SKBR3 24H-canertinib-3.33    | 5/94    | $1.04 \times 10^{-3}$  | $8.06 \times 10^{-3}$  |
| LJP006 HA1E 24H-canertinib-10       | 6/152   | $1.56 \times 10^{-3}$  | $1.12 \times 10^{-2}$  |
| LJP006 SKBR3 24H-canertinib-10      | 5/110   | $2.08 \times 10^{-3}$  | $1.42 \times 10^{-2}$  |
| LJP006 MCF10A 3H-canertinib-3.33    | 4/70    | $2.57 \times 10^{-3}$  | $1.70 \times 10^{-2}$  |
| LJP006 BT20 24H-canertinib-0.12     | 4/71    | $2.70 \times 10^{-3}$  | $1.77 \times 10^{-2}$  |
| LJP006 SKBR3 24H-canertinib-0.37    | 4/78    | $3.80 \times 10^{-3}$  | $2.31 \times 10^{-2}$  |
| LJP006 HS578T 24H-canertinib-10     | 5/156   | $9.11 \times 10^{-3}$  | $4.58 \times 10^{-2}$  |
| LJP006 BT20 24H-canertinib-3.33     | 4/102   | $9.74 \times 10^{-3}$  | $4.81 \times 10^{-2}$  |

Table S7: Canertinib significantly affects the expression of the selected 163 genes as evident in the ‘LINCS L1000 Chem Pert down’ category in Enrichr. The last number after the - is dose density.

| Term                                | Overlap | P-value                | Adjusted P-value       |
|-------------------------------------|---------|------------------------|------------------------|
| LINCS L1000 Chem Pert down          |         |                        |                        |
| LJP006 HME1 24H-canertinib-10       | 13/89   | $3.55 \times 10^{-13}$ | $1.12 \times 10^{-10}$ |
| LJP006 HME1 3H-canertinib-10        | 15/139  | $4.94 \times 10^{-13}$ | $1.46 \times 10^{-10}$ |
| LJP006 BT20 24H-canertinib-10       | 14/128  | $2.53 \times 10^{-12}$ | $5.44 \times 10^{-10}$ |
| LJP006 HS578T 24H-canertinib-10     | 12/92   | $1.18 \times 10^{-11}$ | $1.79 \times 10^{-9}$  |
| LJP006 BT20 24H-canertinib-3.33     | 11/81   | $5.56 \times 10^{-11}$ | $6.53 \times 10^{-9}$  |
| LJP006 HA1E 24H-canertinib-10       | 11/93   | $2.57 \times 10^{-10}$ | $2.29 \times 10^{-8}$  |
| LJP006 SKBR3 24H-canertinib-3.33    | 10/83   | $1.43 \times 10^{-9}$  | $9.39 \times 10^{-8}$  |
| LJP006 SKBR3 24H-canertinib-0.37    | 9/65    | $2.75 \times 10^{-9}$  | $1.62 \times 10^{-7}$  |
| LJP006 MCF10A 3H-canertinib-1.11    | 10/98   | $7.41 \times 10^{-9}$  | $3.75 \times 10^{-7}$  |
| LJP006 HME1 3H-canertinib-1.11      | 9/82    | $2.24 \times 10^{-8}$  | $9.31 \times 10^{-7}$  |
| LJP006 BT20 24H-canertinib-0.37     | 8/63    | $4.34 \times 10^{-8}$  | $1.66 \times 10^{-6}$  |
| LJP006 HS578T 3H-canertinib-10      | 7/54    | $2.69 \times 10^{-7}$  | $7.75 \times 10^{-6}$  |
| LJP006 MCF10A 3H-canertinib-0.37    | 8/85    | $4.63 \times 10^{-7}$  | $1.20 \times 10^{-5}$  |
| LJP006 MCF10A 24H-canertinib-3.33   | 11/193  | $5.44 \times 10^{-7}$  | $1.38 \times 10^{-5}$  |
| LJP006 HME1 3H-canertinib-3.33      | 8/89    | $6.61 \times 10^{-7}$  | $1.62 \times 10^{-5}$  |
| LJP006 BT20 24H-canertinib-0.04     | 6/46    | $1.91 \times 10^{-6}$  | $3.98 \times 10^{-5}$  |
| LJP006 HS578T 3H-canertinib-0.04    | 6/49    | $2.80 \times 10^{-6}$  | $5.46 \times 10^{-5}$  |
| LJP006 HCC515 24H-canertinib-10     | 7/79    | $3.72 \times 10^{-6}$  | $6.95 \times 10^{-5}$  |
| LJP006 BT20 24H-canertinib-1.11     | 6/52    | $3.99 \times 10^{-6}$  | $7.42 \times 10^{-5}$  |
| LJP006 SKBR3 24H-canertinib-1.11    | 7/80    | $4.05 \times 10^{-6}$  | $7.48 \times 10^{-5}$  |
| LJP006 SKBR3 24H-canertinib-10      | 7/85    | $6.08 \times 10^{-6}$  | $1.06 \times 10^{-4}$  |
| LJP006 MCF10A 24H-canertinib-0.12   | 9/170   | $1.09 \times 10^{-5}$  | $1.75 \times 10^{-4}$  |
| LJP006 MCF10A 3H-canertinib-3.33    | 7/94    | $1.19 \times 10^{-5}$  | $1.87 \times 10^{-4}$  |
| LJP006 SKBR3 24H-canertinib-0.12    | 7/94    | $1.19 \times 10^{-5}$  | $1.87 \times 10^{-4}$  |
| LJP006 A375 24H-canertinib-10       | 7/100   | $1.78 \times 10^{-5}$  | $2.62 \times 10^{-4}$  |
| LJP006 MCF10A 3H-canertinib-0.12    | 7/100   | $1.78 \times 10^{-5}$  | $2.62 \times 10^{-4}$  |
| LJP006 HA1E 24H-canertinib-3.33     | 6/71    | $2.47 \times 10^{-5}$  | $3.51 \times 10^{-4}$  |
| LJP006 HCC515 24H-canertinib-3.33   | 6/72    | $2.68 \times 10^{-5}$  | $3.77 \times 10^{-4}$  |
| LJP006 MCF10A 3H-canertinib-10      | 5/46    | $3.54 \times 10^{-5}$  | $4.75 \times 10^{-4}$  |
| LJP006 MCF7 3H-canertinib-10        | 4/28    | $7.47 \times 10^{-5}$  | $8.87 \times 10^{-4}$  |
| LJP006 HME1 3H-canertinib-0.12      | 5/61    | $1.39 \times 10^{-4}$  | $1.49 \times 10^{-3}$  |
| LJP006 BT20 3H-canertinib-10        | 4/33    | $1.45 \times 10^{-4}$  | $1.53 \times 10^{-3}$  |
| LJP006 HME1 24H-canertinib-0.12     | 5/64    | $1.75 \times 10^{-4}$  | $1.81 \times 10^{-3}$  |
| LJP006 HME1 24H-canertinib-0.04     | 5/72    | $3.05 \times 10^{-4}$  | $2.90 \times 10^{-3}$  |
| LJP006 HME1 24H-canertinib-0.37     | 5/73    | $3.25 \times 10^{-4}$  | $3.06 \times 10^{-3}$  |
| LJP006 HME1 3H-canertinib-0.37      | 5/73    | $3.25 \times 10^{-4}$  | $3.06 \times 10^{-3}$  |
| LJP006 MDAMB231 24H-canertinib-10   | 5/76    | $3.92 \times 10^{-4}$  | $3.56 \times 10^{-3}$  |
| LJP006 SKBR3 3H-canertinib-0.37     | 3/19    | $4.68 \times 10^{-4}$  | $4.14 \times 10^{-3}$  |
| LJP006 A375 24H-canertinib-3.33     | 4/45    | $4.88 \times 10^{-4}$  | $4.29 \times 10^{-3}$  |
| LJP006 HME1 24H-canertinib-1.11     | 5/82    | $5.56 \times 10^{-4}$  | $4.77 \times 10^{-3}$  |
| LJP006 MCF7 24H-canertinib-10       | 5/83    | $5.88 \times 10^{-4}$  | $4.98 \times 10^{-3}$  |
| LJP006 A375 24H-canertinib-1.11     | 4/51    | $7.89 \times 10^{-4}$  | $6.40 \times 10^{-3}$  |
| LJP006 MCF10A 3H-canertinib-0.04    | 4/51    | $7.89 \times 10^{-4}$  | $6.39 \times 10^{-3}$  |
| LJP006 BT20 3H-canertinib-0.12      | 3/24    | $9.48 \times 10^{-4}$  | $7.48 \times 10^{-3}$  |
| LJP006 SKBR3 24H-canertinib-0.04    | 5/93    | $9.86 \times 10^{-4}$  | $7.71 \times 10^{-3}$  |
| LJP006 HCC515 24H-canertinib-0.04   | 3/25    | $1.07 \times 10^{-3}$  | $8.26 \times 10^{-3}$  |
| LJP006 HME1 3H-canertinib-0.04      | 4/57    | $1.20 \times 10^{-3}$  | $9.10 \times 10^{-3}$  |
| LJP006 SKBR3 3H-canertinib-10       | 3/26    | $1.20 \times 10^{-3}$  | $9.09 \times 10^{-3}$  |
| LJP006 MDAMB231 3H-canertinib-10    | 4/62    | $1.64 \times 10^{-3}$  | $1.18 \times 10^{-2}$  |
| LJP006 BT20 24H-canertinib-0.12     | 3/32    | $2.22 \times 10^{-3}$  | $1.51 \times 10^{-2}$  |
| LJP006 MCF7 24H-canertinib-3.33     | 3/37    | $3.37 \times 10^{-3}$  | $2.13 \times 10^{-2}$  |
| LJP006 HCC515 24H-canertinib-0.37   | 3/39    | $3.92 \times 10^{-3}$  | $2.41 \times 10^{-2}$  |
| LJP006 MCF10A 24H-canertinib-0.04   | 6/186   | $4.25 \times 10^{-3}$  | $2.57 \times 10^{-2}$  |
| LJP006 A549 24H-canertinib-10       | 3/43    | $5.16 \times 10^{-3}$  | $3.00 \times 10^{-2}$  |
| LJP006 MDAMB231 24H-canertinib-3.33 | 5       | 2/17                   | $8.29 \times 10^{-3}$  |

Table S8: BX-795 significantly affects the expression of the selected 163 genes as evident in the ‘LINCS L1000 Chem Pert up/down’ category in Enrichr. The last number after the - is dose density.

| Term                         | Overlap | P-value                | Adjusted P-value       |
|------------------------------|---------|------------------------|------------------------|
| LINCS L1000 Chem Pert up     |         |                        |                        |
| LJP009 PC3 24H-BX-795-10     | 18/92   | $3.37 \times 10^{-20}$ | $1.01 \times 10^{-16}$ |
| LJP009 HT29 24H-BX-795-10    | 14/102  | $1.04 \times 10^{-13}$ | $3.95 \times 10^{-11}$ |
| LJP009 HCC515 24H-BX-795-10  | 9/101   | $1.40 \times 10^{-7}$  | $4.80 \times 10^{-6}$  |
| LJP009 HEPG2 24H-BX-795-10   | 8/81    | $3.18 \times 10^{-7}$  | $9.42 \times 10^{-6}$  |
| LJP009 MCF7 24H-BX-795-10    | 9/113   | $3.68 \times 10^{-7}$  | $1.07 \times 10^{-5}$  |
| LJP009 MCF7 24H-BX-795-3.33  | 5/58    | $1.09 \times 10^{-4}$  | $1.24 \times 10^{-3}$  |
| LJP009 A549 24H-BX-795-10    | 4/40    | $3.09 \times 10^{-4}$  | $2.94 \times 10^{-3}$  |
| LJP009 HA1E 24H-BX-795-10    | 3/34    | $2.64 \times 10^{-3}$  | $1.74 \times 10^{-2}$  |
| LJP009 A375 24H-BX-795-1.11  | 3/51    | $8.31 \times 10^{-3}$  | $4.26 \times 10^{-2}$  |
| LINCS L1000 Chem Pert down   |         |                        |                        |
| LJP009 HA1E 24H-BX-795-10    | 6/43    | $1.27 \times 10^{-6}$  | $2.84 \times 10^{-5}$  |
| LJP009 HA1E 24H-BX-795-3.33  | 4/37    | $2.28 \times 10^{-4}$  | $2.27 \times 10^{-3}$  |
| LJP009 HEPG2 24H-BX-795-3.33 | 3/36    | $3.11 \times 10^{-3}$  | $2.01 \times 10^{-2}$  |
| LJP009 HEPG2 24H-BX-795-10   | 4/94    | $7.35 \times 10^{-3}$  | $3.97 \times 10^{-2}$  |

Table S9: Sorafenib significantly affects the expression of the selected 163 genes as evident in the ‘LINCS L1000 Chem Pert up’ category in Enrichr. The last number after the - is dose density.

| Term                              | Overlap | P-value                | Adjusted P-value       |
|-----------------------------------|---------|------------------------|------------------------|
| LINCS L1000 Chem Pert up          |         |                        |                        |
| LJP006 SKBR3 3H-sorafenib-10      | 15/56   | $2.94 \times 10^{-19}$ | $8.10 \times 10^{-16}$ |
| LJP006 A549 24H-sorafenib-10      | 14/146  | $1.55 \times 10^{-11}$ | $2.50 \times 10^{-9}$  |
| LJP006 HEPG2 24H-sorafenib-10     | 10/74   | $4.49 \times 10^{-10}$ | $3.87 \times 10^{-8}$  |
| LJP006 LNCAP 24H-sorafenib-10     | 13/165  | $9.86 \times 10^{-10}$ | $7.44 \times 10^{-8}$  |
| LJP006 MCF7 24H-sorafenib-10      | 8/59    | $2.55 \times 10^{-8}$  | $1.13 \times 10^{-6}$  |
| LJP006 HME1 3H-sorafenib-3.33     | 7/44    | $6.24 \times 10^{-8}$  | $2.43 \times 10^{-6}$  |
| LJP006 HME1 24H-sorafenib-3.33    | 9/107   | $2.30 \times 10^{-7}$  | $7.23 \times 10^{-6}$  |
| LJP006 PC3 24H-sorafenib-10       | 8/78    | $2.37 \times 10^{-7}$  | $7.36 \times 10^{-6}$  |
| LJP006 SKBR3 24H-sorafenib-10     | 9/111   | $3.16 \times 10^{-7}$  | $9.36 \times 10^{-6}$  |
| LJP006 HT29 24H-sorafenib-10      | 7/57    | $3.94 \times 10^{-7}$  | $1.13 \times 10^{-5}$  |
| LJP006 HCC515 24H-sorafenib-10    | 9/117   | $4.95 \times 10^{-7}$  | $1.38 \times 10^{-5}$  |
| LJP006 BT20 24H-sorafenib-10      | 8/86    | $5.07 \times 10^{-7}$  | $1.40 \times 10^{-5}$  |
| LJP006 HA1E 24H-sorafenib-10      | 9/119   | $5.72 \times 10^{-7}$  | $1.55 \times 10^{-5}$  |
| LJP006 HME1 24H-sorafenib-10      | 8/111   | $3.55 \times 10^{-6}$  | $7.05 \times 10^{-5}$  |
| LJP006 BT20 3H-sorafenib-10       | 4/20    | $1.86 \times 10^{-5}$  | $2.78 \times 10^{-4}$  |
| LJP006 HME1 3H-sorafenib-10       | 7/114   | $4.16 \times 10^{-5}$  | $5.55 \times 10^{-4}$  |
| LJP006 A375 24H-sorafenib-10      | 6/84    | $6.43 \times 10^{-5}$  | $7.96 \times 10^{-4}$  |
| LJP006 HME1 24H-sorafenib-1.11    | 5/78    | $4.42 \times 10^{-4}$  | $3.96 \times 10^{-3}$  |
| LJP006 HEPG2 24H-sorafenib-3.33   | 4/53    | $9.12 \times 10^{-4}$  | $7.24 \times 10^{-3}$  |
| LINCS L1000 Chem Pert down        |         |                        |                        |
| LJP006 HA1E 24H-sorafenib-10      | 12/92   | $1.18 \times 10^{-11}$ | $1.80 \times 10^{-9}$  |
| LJP006 HME1 24H-sorafenib-10      | 10/95   | $5.46 \times 10^{-9}$  | $2.92 \times 10^{-7}$  |
| LJP006 HEPG2 24H-sorafenib-10     | 9/91    | $5.63 \times 10^{-8}$  | $2.07 \times 10^{-6}$  |
| LJP006 HS578T 24H-sorafenib-10    | 7/63    | $7.91 \times 10^{-7}$  | $1.89 \times 10^{-5}$  |
| LJP006 HEPG2 24H-sorafenib-3.33   | 6/51    | $3.55 \times 10^{-6}$  | $6.65 \times 10^{-5}$  |
| LJP006 HS578T 3H-sorafenib-10     | 5/41    | $2.00 \times 10^{-5}$  | $2.92 \times 10^{-4}$  |
| LJP006 HME1 3H-sorafenib-10       | 6/74    | $3.13 \times 10^{-5}$  | $4.30 \times 10^{-4}$  |
| LJP006 BT20 24H-sorafenib-10      | 6/79    | $4.54 \times 10^{-5}$  | $5.84 \times 10^{-4}$  |
| LJP006 MDAMB231 3H-sorafenib-10   | 5/58    | $1.09 \times 10^{-4}$  | $1.21 \times 10^{-3}$  |
| LJP006 SKBR3 24H-sorafenib-10     | 5/125   | $3.62 \times 10^{-3}$  | $2.27 \times 10^{-2}$  |
| LJP006 HME1 24H-sorafenib-3.33    | 4/88    | $5.83 \times 10^{-3}$  | $3.31 \times 10^{-2}$  |
| LJP006 MDAMB231 3H-sorafenib-1.11 | 3/48    | $7.03 \times 10^{-3}$  | $3.82 \times 10^{-2}$  |

Table S10: QL-X-138 significantly affects the expression of the selected 163 genes as evident in the ‘LINCS L1000 Chem Pert up’ category in Enrichr. The last number after the - is dose density.

| Term                              | Overlap | P-value                | Adjusted P-value      |
|-----------------------------------|---------|------------------------|-----------------------|
| LINCS L1000 Chem Pert up          |         |                        |                       |
| LJP006 MCF10A 24H-QL-X-138-3.33   | 11/105  | $9.66 \times 10^{-10}$ | $7.34 \times 10^{-8}$ |
| LJP006 HCC515 24H-QL-X-138-10     | 13/169  | $1.32 \times 10^{-9}$  | $9.25 \times 10^{-8}$ |
| LJP006 HME1 3H-QL-X-138-3.33      | 11/111  | $1.76 \times 10^{-9}$  | $1.17 \times 10^{-7}$ |
| LJP006 MDAMB231 24H-QL-X-138-1.11 | 6/25    | $4.16 \times 10^{-8}$  | $1.70 \times 10^{-6}$ |
| LJP006 HME1 24H-QL-X-138-3.33     | 11/150  | $4.21 \times 10^{-8}$  | $1.70 \times 10^{-6}$ |
| LJP006 PC3 24H-QL-X-138-3.33      | 8/68    | $8.00 \times 10^{-8}$  | $2.98 \times 10^{-6}$ |
| LJP006 HME1 24H-QL-X-138-1.11     | 9/111   | $3.16 \times 10^{-7}$  | $9.39 \times 10^{-6}$ |
| LJP006 HEPG2 24H-QL-X-138-10      | 9/127   | $9.91 \times 10^{-7}$  | $2.45 \times 10^{-5}$ |
| LJP006 HME1 3H-QL-X-138-0.37      | 6/48    | $2.47 \times 10^{-6}$  | $5.22 \times 10^{-5}$ |
| LJP006 A375 24H-QL-X-138-1.11     | 6/50    | $3.16 \times 10^{-6}$  | $6.37 \times 10^{-5}$ |
| LJP006 HEPG2 24H-QL-X-138-1.11    | 6/51    | $3.55 \times 10^{-6}$  | $7.02 \times 10^{-5}$ |
| LJP006 MCF10A 3H-QL-X-138-1.11    | 5/30    | $4.09 \times 10^{-6}$  | $7.86 \times 10^{-5}$ |
| LJP006 A375 24H-QL-X-138-10       | 9/164   | $8.19 \times 10^{-6}$  | $1.41 \times 10^{-4}$ |
| LJP006 HEPG2 24H-QL-X-138-3.33    | 7/92    | $1.03 \times 10^{-5}$  | $1.69 \times 10^{-4}$ |
| LJP006 MCF7 24H-QL-X-138-3.33     | 6/65    | $1.48 \times 10^{-5}$  | $2.30 \times 10^{-4}$ |
| LJP006 A549 24H-QL-X-138-10       | 8/149   | $3.08 \times 10^{-5}$  | $4.31 \times 10^{-4}$ |
| LJP006 HT29 24H-QL-X-138-10       | 5/46    | $3.54 \times 10^{-5}$  | $4.83 \times 10^{-4}$ |
| LJP006 HCC515 24H-QL-X-138-3.33   | 5/53    | $7.07 \times 10^{-5}$  | $8.57 \times 10^{-4}$ |
| LJP006 HS578T 24H-QL-X-138-0.37   | 5/54    | $7.75 \times 10^{-5}$  | $9.27 \times 10^{-4}$ |
| LJP006 HME1 3H-QL-X-138-10        | 6/90    | $9.46 \times 10^{-5}$  | $1.10 \times 10^{-3}$ |
| LJP006 SKBR3 24H-QL-X-138-0.37    | 5/62    | $1.50 \times 10^{-4}$  | $1.61 \times 10^{-3}$ |
| LJP006 HME1 24H-QL-X-138-10       | 8/189   | $1.64 \times 10^{-4}$  | $1.72 \times 10^{-3}$ |
| LJP006 LNCAP 24H-QL-X-138-3.33    | 5/65    | $1.88 \times 10^{-4}$  | $1.93 \times 10^{-3}$ |
| LJP006 MCF7 24H-QL-X-138-0.12     | 4/42    | $3.74 \times 10^{-4}$  | $3.44 \times 10^{-3}$ |
| LJP006 MCF10A 3H-QL-X-138-0.37    | 4/46    | $5.31 \times 10^{-4}$  | $4.63 \times 10^{-3}$ |
| LJP006 SKBR3 24H-QL-X-138-1.11    | 5/83    | $5.88 \times 10^{-4}$  | $5.02 \times 10^{-3}$ |
| LJP006 PC3 24H-QL-X-138-10        | 7/186   | $8.46 \times 10^{-4}$  | $6.83 \times 10^{-3}$ |
| LJP006 MDAMB231 3H-QL-X-138-10    | 4/54    | $9.79 \times 10^{-4}$  | $7.68 \times 10^{-3}$ |
| LJP006 PC3 24H-QL-X-138-1.11      | 4/55    | $1.05 \times 10^{-3}$  | $8.14 \times 10^{-3}$ |
| LJP006 MDAMB231 24H-QL-X-138-3.33 | 3/25    | $1.07 \times 10^{-3}$  | $8.26 \times 10^{-3}$ |
| LJP006 HS578T 24H-QL-X-138-0.12   | 4/56    | $1.12 \times 10^{-3}$  | $8.58 \times 10^{-3}$ |
| LJP006 A375 24H-QL-X-138-3.33     | 5/97    | $1.19 \times 10^{-3}$  | $9.04 \times 10^{-3}$ |
| LJP006 HS578T 24H-QL-X-138-1.11   | 4/58    | $1.28 \times 10^{-3}$  | $9.54 \times 10^{-3}$ |
| LJP006 MCF7 24H-QL-X-138-1.11     | 4/59    | $1.37 \times 10^{-3}$  | $1.00 \times 10^{-2}$ |
| LJP006 MCF7 24H-QL-X-138-10       | 5/101   | $1.43 \times 10^{-3}$  | $1.04 \times 10^{-2}$ |
| LJP006 SKBR3 24H-QL-X-138-10      | 6/173   | $2.98 \times 10^{-3}$  | $1.91 \times 10^{-2}$ |
| LJP006 BT20 24H-QL-X-138-10       | 6/177   | $3.34 \times 10^{-3}$  | $2.10 \times 10^{-2}$ |
| LJP006 PC3 24H-QL-X-138-0.37      | 3/37    | $3.37 \times 10^{-3}$  | $2.11 \times 10^{-2}$ |
| LJP006 HS578T 3H-QL-X-138-10      | 4/77    | $3.63 \times 10^{-3}$  | $2.24 \times 10^{-2}$ |
| LJP006 MCF10A 24H-QL-X-138-10     | 6/188   | $4.48 \times 10^{-3}$  | $2.65 \times 10^{-2}$ |
| LJP006 HS578T 3H-QL-X-138-3.33    | 3/42    | $4.83 \times 10^{-3}$  | $2.79 \times 10^{-2}$ |
| LJP006 LNCAP 24H-QL-X-138-1.11    | 3/44    | $5.51 \times 10^{-3}$  | $3.09 \times 10^{-2}$ |
| LJP006 BT20 24H-QL-X-138-3.33     | 4/91    | $6.56 \times 10^{-3}$  | $3.54 \times 10^{-2}$ |
| LJP006 MCF7 3H-QL-X-138-10        | 3/51    | $8.31 \times 10^{-3}$  | $4.25 \times 10^{-2}$ |



Table S11: QL-X-138 significantly affects the expression of the selected 163 genes as evident in the ‘LINCS L1000 Chem Pert down’ category in Enrichr. The last number after the - is dose density.

| Term                              | Overlap | P-value                | Adjusted P-value       |
|-----------------------------------|---------|------------------------|------------------------|
| LINCS L1000 Chem Pert down        |         |                        |                        |
| LJP006 HA1E 24H-QL-X-138-10       | 33/219  | $1.76 \times 10^{-32}$ | $5.84 \times 10^{-28}$ |
| LJP006 HA1E 24H-QL-X-138-3.33     | 21/201  | $1.62 \times 10^{-17}$ | $4.47 \times 10^{-14}$ |
| LJP006 HS578T 24H-QL-X-138-10     | 22/230  | $1.77 \times 10^{-17}$ | $4.51 \times 10^{-14}$ |
| LJP006 BT20 24H-QL-X-138-10       | 19/157  | $3.74 \times 10^{-17}$ | $7.29 \times 10^{-14}$ |
| LJP006 HS578T 24H-QL-X-138-3.33   | 13/97   | $1.11 \times 10^{-12}$ | $2.86 \times 10^{-10}$ |
| LJP006 HA1E 24H-QL-X-138-0.37     | 11/60   | $1.82 \times 10^{-12}$ | $4.22 \times 10^{-10}$ |
| LJP006 HA1E 24H-QL-X-138-1.11     | 13/101  | $1.89 \times 10^{-12}$ | $4.27 \times 10^{-10}$ |
| LJP006 SKBR3 24H-QL-X-138-10      | 15/153  | $2.04 \times 10^{-12}$ | $4.53 \times 10^{-10}$ |
| LJP006 HME1 24H-QL-X-138-10       | 14/149  | $2.04 \times 10^{-11}$ | $2.81 \times 10^{-9}$  |
| LJP006 BT20 24H-QL-X-138-3.33     | 10/71   | $2.95 \times 10^{-10}$ | $2.58 \times 10^{-8}$  |
| LJP006 HCC515 24H-QL-X-138-10     | 11/124  | $5.74 \times 10^{-9}$  | $3.04 \times 10^{-7}$  |
| LJP006 HEPG2 24H-QL-X-138-10      | 12/176  | $2.27 \times 10^{-8}$  | $9.40 \times 10^{-7}$  |
| LJP006 BT20 24H-QL-X-138-1.11     | 9/98    | $1.08 \times 10^{-7}$  | $3.57 \times 10^{-6}$  |
| LJP006 MDAMB231 24H-QL-X-138-3.33 | 6/29    | $1.09 \times 10^{-7}$  | $3.60 \times 10^{-6}$  |
| LJP006 PC3 24H-QL-X-138-10        | 10/148  | $3.80 \times 10^{-7}$  | $1.02 \times 10^{-5}$  |
| LJP006 HS578T 3H-QL-X-138-10      | 7/68    | $1.34 \times 10^{-6}$  | $2.95 \times 10^{-5}$  |
| LJP006 A549 24H-QL-X-138-10       | 9/136   | $1.76 \times 10^{-6}$  | $3.71 \times 10^{-5}$  |
| LJP006 LNCAP 24H-QL-X-138-1.11    | 8/105   | $2.34 \times 10^{-6}$  | $4.73 \times 10^{-5}$  |
| LJP006 HS578T 24H-QL-X-138-0.37   | 6/52    | $3.99 \times 10^{-6}$  | $7.40 \times 10^{-5}$  |
| LJP006 HME1 24H-QL-X-138-3.33     | 8/117   | $5.26 \times 10^{-6}$  | $9.38 \times 10^{-5}$  |
| LJP006 A375 24H-QL-X-138-3.33     | 8/118   | $5.61 \times 10^{-6}$  | $9.92 \times 10^{-5}$  |
| LJP006 HME1 3H-QL-X-138-3.33      | 6/56    | $6.19 \times 10^{-6}$  | $1.07 \times 10^{-4}$  |
| LJP006 LNCAP 24H-QL-X-138-3.33    | 8/121   | $6.76 \times 10^{-6}$  | $1.16 \times 10^{-4}$  |
| LJP006 MCF7 24H-QL-X-138-1.11     | 5/35    | $9.01 \times 10^{-6}$  | $1.48 \times 10^{-4}$  |
| LJP006 HME1 24H-QL-X-138-1.11     | 7/92    | $1.03 \times 10^{-5}$  | $1.66 \times 10^{-4}$  |
| LJP006 SKBR3 24H-QL-X-138-0.12    | 5/38    | $1.37 \times 10^{-5}$  | $2.10 \times 10^{-4}$  |
| LJP006 HA1E 24H-QL-X-138-0.12     | 5/40    | $1.77 \times 10^{-5}$  | $2.63 \times 10^{-4}$  |
| LJP006 HT29 24H-QL-X-138-10       | 5/40    | $1.77 \times 10^{-5}$  | $2.63 \times 10^{-4}$  |
| LJP006 MCF7 24H-QL-X-138-0.12     | 6/77    | $3.93 \times 10^{-5}$  | $5.20 \times 10^{-4}$  |
| LJP006 SKBR3 24H-QL-X-138-1.11    | 6/81    | $5.24 \times 10^{-5}$  | $6.60 \times 10^{-4}$  |
| LJP006 BT20 3H-QL-X-138-3.33      | 4/29    | $8.61 \times 10^{-5}$  | $9.96 \times 10^{-4}$  |
| LJP006 A375 24H-QL-X-138-10       | 8/176   | $1.00 \times 10^{-4}$  | $1.13 \times 10^{-3}$  |
| LJP006 MCF10A 24H-QL-X-138-10     | 7/133   | $1.11 \times 10^{-4}$  | $1.22 \times 10^{-3}$  |
| LJP006 BT20 3H-QL-X-138-10        | 4/35    | $1.83 \times 10^{-4}$  | $1.87 \times 10^{-3}$  |
| LJP006 HS578T 24H-QL-X-138-1.11   | 5/68    | $2.33 \times 10^{-4}$  | $2.30 \times 10^{-3}$  |
| LJP006 MCF7 24H-QL-X-138-10       | 5/82    | $5.56 \times 10^{-4}$  | $4.77 \times 10^{-3}$  |
| LJP006 SKBR3 3H-QL-X-138-1.11     | 3/22    | $7.30 \times 10^{-4}$  | $6.00 \times 10^{-3}$  |
| LJP006 PC3 24H-QL-X-138-0.12      | 3/23    | $8.35 \times 10^{-4}$  | $6.72 \times 10^{-3}$  |
| LJP006 SKBR3 3H-QL-X-138-0.37     | 3/25    | $1.07 \times 10^{-3}$  | $8.25 \times 10^{-3}$  |
| LJP006 MCF7 24H-QL-X-138-0.37     | 3/28    | $1.50 \times 10^{-3}$  | $1.09 \times 10^{-2}$  |
| LJP006 HME1 3H-QL-X-138-0.37      | 3/32    | $2.22 \times 10^{-3}$  | $1.51 \times 10^{-2}$  |
| LJP006 SKBR3 24H-QL-X-138-0.37    | 4/68    | $2.31 \times 10^{-3}$  | $1.56 \times 10^{-2}$  |
| LJP006 A375 24H-QL-X-138-1.11     | 3/34    | $2.64 \times 10^{-3}$  | $1.75 \times 10^{-2}$  |
| LJP006 BT20 24H-QL-X-138-0.37     | 3/36    | $3.11 \times 10^{-3}$  | $2.01 \times 10^{-2}$  |
| LJP006 PC3 24H-QL-X-138-0.37      | 3/39    | $3.92 \times 10^{-3}$  | $2.40 \times 10^{-2}$  |
| LJP006 MCF7 24H-QL-X-138-3.33     | 3/42    | $4.83 \times 10^{-3}$  | $2.84 \times 10^{-2}$  |
| LJP006 SKBR3 3H-QL-X-138-3.33     | 3/45    | $5.87 \times 10^{-3}$  | $3.31 \times 10^{-2}$  |
| LJP006 BT20 3H-QL-X-138-0.37      | 2/15    | $6.47 \times 10^{-3}$  | $3.57 \times 10^{-2}$  |
| LJP006 SKBR3 24H-QL-X-138-3.33    | 5/144   | $6.56 \times 10^{-3}$  | $3.62 \times 10^{-2}$  |
| LJP006 PC3 24H-QL-X-138-3.33      | 3/48    | $7.03 \times 10^{-3}$  | $3.82 \times 10^{-2}$  |

Table S12: Radicicol significantly affects the expression of the selected 163 genes due to ‘LINCS L1000 Chem Pert up’ category in Enrichr. The last number after the - is dose density.

| Term                               | Overlap | P-value                | Adjusted P-value       |
|------------------------------------|---------|------------------------|------------------------|
| LINCS L1000 Chem Pert up           |         |                        |                        |
| LJP006 MCF7 24H-radicicol-10       | 17/149  | $5.02 \times 10^{-15}$ | $3.39 \times 10^{-12}$ |
| LJP006 SKBR3 3H-radicicol-10       | 13/74   | $2.94 \times 10^{-14}$ | $1.33 \times 10^{-11}$ |
| LJP006 MCF7 24H-radicicol-3.33     | 15/123  | $7.94 \times 10^{-14}$ | $3.09 \times 10^{-11}$ |
| LJP005 HS578T 3H-radicicol-10      | 10/50   | $7.59 \times 10^{-12}$ | $1.43 \times 10^{-9}$  |
| LJP005 MCF10A 24H-radicicol-3.33   | 15/184  | $2.95 \times 10^{-11}$ | $4.18 \times 10^{-9}$  |
| LJP005 MCF7 24H-radicicol-1.11     | 12/109  | $9.04 \times 10^{-11}$ | $1.05 \times 10^{-8}$  |
| LJP005 HA1E 24H-radicicol-3.33     | 11/87   | $1.23 \times 10^{-10}$ | $1.34 \times 10^{-8}$  |
| LJP006 MCF7 24H-radicicol-1.11     | 11/87   | $1.23 \times 10^{-10}$ | $1.33 \times 10^{-8}$  |
| LJP006 HME1 3H-radicicol-3.33      | 11/92   | $2.28 \times 10^{-10}$ | $2.20 \times 10^{-8}$  |
| LJP006 HME1 24H-radicicol-3.33     | 13/147  | $2.34 \times 10^{-10}$ | $2.24 \times 10^{-8}$  |
| LJP006 HEPG2 24H-radicicol-10      | 14/179  | $2.40 \times 10^{-10}$ | $2.29 \times 10^{-8}$  |
| LJP006 BT20 24H-radicicol-10       | 14/180  | $2.59 \times 10^{-10}$ | $2.43 \times 10^{-8}$  |
| LJP005 BT20 3H-radicicol-10        | 10/71   | $2.95 \times 10^{-10}$ | $2.74 \times 10^{-8}$  |
| LJP005 SKBR3 3H-radicicol-10       | 10/71   | $2.95 \times 10^{-10}$ | $2.74 \times 10^{-8}$  |
| LJP005 MCF10A 3H-radicicol-3.33    | 11/97   | $4.08 \times 10^{-10}$ | $3.56 \times 10^{-8}$  |
| LJP005 MCF7 24H-radicicol-10       | 13/159  | $6.23 \times 10^{-10}$ | $5.11 \times 10^{-8}$  |
| LJP005 SKBR3 24H-radicicol-10      | 13/163  | $8.48 \times 10^{-10}$ | $6.58 \times 10^{-8}$  |
| LJP005 MCF7 24H-radicicol-3.33     | 12/133  | $9.36 \times 10^{-10}$ | $7.16 \times 10^{-8}$  |
| LJP005 SKBR3 3H-radicicol-0.04     | 7/26    | $1.21 \times 10^{-9}$  | $8.61 \times 10^{-8}$  |
| LJP005 HEPG2 24H-radicicol-1.11    | 11/112  | $1.94 \times 10^{-9}$  | $1.27 \times 10^{-7}$  |
| LJP005 MCF7 3H-radicicol-0.12      | 9/66    | $3.16 \times 10^{-9}$  | $1.90 \times 10^{-7}$  |
| LJP005 MCF10A 24H-radicicol-10     | 14/219  | $3.37 \times 10^{-9}$  | $2.00 \times 10^{-7}$  |
| LJP005 MCF10A 3H-radicicol-10      | 10/97   | $6.70 \times 10^{-9}$  | $3.67 \times 10^{-7}$  |
| LJP005 MDAMB231 24H-radicicol-3.33 | 9/73    | $7.90 \times 10^{-9}$  | $4.23 \times 10^{-7}$  |
| LJP006 HCC515 24H-radicicol-10     | 10/99   | $8.19 \times 10^{-9}$  | $4.35 \times 10^{-7}$  |
| LJP006 HA1E 24H-radicicol-3.33     | 10/100  | $9.03 \times 10^{-9}$  | $4.75 \times 10^{-7}$  |
| LJP006 SKBR3 24H-radicicol-10      | 13/203  | $1.23 \times 10^{-8}$  | $6.08 \times 10^{-7}$  |
| LJP005 A375 24H-radicicol-3.33     | 10/104  | $1.32 \times 10^{-8}$  | $6.46 \times 10^{-7}$  |
| LJP005 SKBR3 3H-radicicol-1.11     | 7/37    | $1.76 \times 10^{-8}$  | $8.22 \times 10^{-7}$  |
| LJP006 HME1 24H-radicicol-0.37     | 11/145  | $2.97 \times 10^{-8}$  | $1.27 \times 10^{-6}$  |
| LJP006 LNCAP 3H-radicicol-0.04     | 7/40    | $3.12 \times 10^{-8}$  | $1.33 \times 10^{-6}$  |
| LJP006 MCF10A 24H-radicicol-0.37   | 12/186  | $4.19 \times 10^{-8}$  | $1.70 \times 10^{-6}$  |
| LJP005 BT20 3H-radicicol-1.11      | 8/65    | $5.57 \times 10^{-8}$  | $2.20 \times 10^{-6}$  |
| LJP006 BT20 3H-radicicol-10        | 7/45    | $7.34 \times 10^{-8}$  | $2.78 \times 10^{-6}$  |
| LJP006 LNCAP 24H-radicicol-10      | 10/131  | $1.21 \times 10^{-7}$  | $4.24 \times 10^{-6}$  |
| LJP005 PC3 24H-radicicol-10        | 8/72    | $1.26 \times 10^{-7}$  | $4.38 \times 10^{-6}$  |
| LJP005 HS578T 24H-radicicol-1.11   | 7/49    | $1.35 \times 10^{-7}$  | $4.66 \times 10^{-6}$  |
| LJP005 HCC515 24H-radicicol-10     | 9/101   | $1.40 \times 10^{-7}$  | $4.79 \times 10^{-6}$  |
| LJP005 HEPG2 24H-radicicol-3.33    | 10/133  | $1.40 \times 10^{-7}$  | $4.78 \times 10^{-6}$  |
| LJP006 PC3 24H-radicicol-10        | 10/139  | $2.12 \times 10^{-7}$  | $6.73 \times 10^{-6}$  |
| LJP005 HA1E 24H-radicicol-10       | 11/177  | $2.29 \times 10^{-7}$  | $7.18 \times 10^{-6}$  |
| LJP006 MCF10A 24H-radicicol-3.33   | 11/178  | $2.42 \times 10^{-7}$  | $7.51 \times 10^{-6}$  |
| LJP005 BT20 3H-radicicol-0.04      | 5/18    | $2.66 \times 10^{-7}$  | $8.17 \times 10^{-6}$  |
| LJP006 MCF10A 3H-radicicol-0.37    | 7/57    | $3.94 \times 10^{-7}$  | $1.13 \times 10^{-5}$  |
| LJP006 MCF7 3H-radicicol-3.33      | 6/37    | $5.04 \times 10^{-7}$  | $1.39 \times 10^{-5}$  |
| LJP006 SKBR3 3H-radicicol-3.33     | 8/87    | $5.54 \times 10^{-7}$  | $1.52 \times 10^{-5}$  |
| LJP006 HEPG2 24H-radicicol-3.33    | 8/90    | $7.20 \times 10^{-7}$  | $1.89 \times 10^{-5}$  |
| LJP006 MCF10A 24H-radicicol-0.12   | 9/123   | $7.57 \times 10^{-7}$  | $1.97 \times 10^{-5}$  |
| LJP005 MCF10A 24H-radicicol-1.11   | 11/202  | $8.54 \times 10^{-7}$  | $2.17 \times 10^{-5}$  |
| LJP005 HCC515 24H-radicicol-3.33   | 7/64    | $8.83 \times 10^{-7}$  | $2.23 \times 10^{-5}$  |
| LJP006 HCC515 24H-radicicol-1.11   | 8/93    | $9.27 \times 10^{-7}$  | $2.33 \times 10^{-5}$  |
| LJP005 MCF10A 3H-radicicol-0.04    | 6/42    | $1.10 \times 10^{-6}$  | $2.66 \times 10^{-5}$  |
| LJP006 LNCAP 24H-radicicol-3.33    | 8/96    | $1.18 \times 10^{-6}$  | $2.84 \times 10^{-5}$  |

Table S12: (Continued)

|                                  |        |                       |                       |
|----------------------------------|--------|-----------------------|-----------------------|
| LJP005 SKBR3 3H-radicol-3.33     | 7/67   | $1.21 \times 10^{-6}$ | $2.89 \times 10^{-5}$ |
| LJP005 PC3 24H-radicol-0.37      | 6/43   | $1.27 \times 10^{-6}$ | $3.02 \times 10^{-5}$ |
| LJP006 MCF10A 24H-radicol-10     | 11/212 | $1.37 \times 10^{-6}$ | $3.21 \times 10^{-5}$ |
| LJP005 SKBR3 24H-radicol-3.33    | 9/133  | $1.46 \times 10^{-6}$ | $3.40 \times 10^{-5}$ |
| LJP005 HEPG2 24H-radicol-10      | 10/177 | $1.96 \times 10^{-6}$ | $4.30 \times 10^{-5}$ |
| LJP006 A375 24H-radicol-3.33     | 7/74   | $2.39 \times 10^{-6}$ | $5.08 \times 10^{-5}$ |
| LJP006 HS578T 3H-radicol-1.11    | 6/49   | $2.80 \times 10^{-6}$ | $5.81 \times 10^{-5}$ |
| LJP006 SKBR3 24H-radicol-3.33    | 8/109  | $3.10 \times 10^{-6}$ | $6.32 \times 10^{-5}$ |
| LJP005 BT20 24H-radicol-1.11     | 6/50   | $3.16 \times 10^{-6}$ | $6.38 \times 10^{-5}$ |
| LJP005 MCF10A 3H-radicol-1.11    | 6/50   | $3.16 \times 10^{-6}$ | $6.38 \times 10^{-5}$ |
| LJP006 MCF10A 3H-radicol-10      | 8/110  | $3.32 \times 10^{-6}$ | $6.65 \times 10^{-5}$ |
| LJP005 MCF10A 24H-radicol-0.12   | 8/111  | $3.55 \times 10^{-6}$ | $7.06 \times 10^{-5}$ |
| LJP006 MCF7 24H-radicol-0.37     | 6/51   | $3.55 \times 10^{-6}$ | $7.02 \times 10^{-5}$ |
| LJP006 HA1E 24H-radicol-0.37     | 7/79   | $3.72 \times 10^{-6}$ | $7.30 \times 10^{-5}$ |
| LJP006 PC3 24H-radicol-0.37      | 5/31   | $4.84 \times 10^{-6}$ | $9.15 \times 10^{-5}$ |
| LJP006 HME1 3H-radicol-10        | 8/119  | $5.97 \times 10^{-6}$ | $1.09 \times 10^{-4}$ |
| LJP006 HME1 3H-radicol-1.11      | 7/86   | $6.57 \times 10^{-6}$ | $1.18 \times 10^{-4}$ |
| LJP006 MCF10A 24H-radicol-1.11   | 10/204 | $6.95 \times 10^{-6}$ | $1.24 \times 10^{-4}$ |
| LJP006 HS578T 24H-radicol-3.33   | 8/123  | $7.63 \times 10^{-6}$ | $1.33 \times 10^{-4}$ |
| LJP005 MDAMB231 3H-radicol-0.12  | 5/35   | $9.01 \times 10^{-6}$ | $1.53 \times 10^{-4}$ |
| LJP006 MCF10A 3H-radicol-0.12    | 6/60   | $9.30 \times 10^{-6}$ | $1.57 \times 10^{-4}$ |
| LJP005 HA1E 24H-radicol-0.37     | 6/64   | $1.36 \times 10^{-5}$ | $2.15 \times 10^{-4}$ |
| LJP006 MDAMB231 24H-radicol-10   | 7/96   | $1.36 \times 10^{-5}$ | $2.14 \times 10^{-4}$ |
| LJP006 HME1 3H-radicol-0.04      | 4/19   | $1.50 \times 10^{-5}$ | $2.32 \times 10^{-4}$ |
| LJP006 MCF7 3H-radicol-0.12      | 4/19   | $1.50 \times 10^{-5}$ | $2.32 \times 10^{-4}$ |
| LJP005 MDAMB231 24H-radicol-10   | 5/40   | $1.77 \times 10^{-5}$ | $2.67 \times 10^{-4}$ |
| LJP006 HME1 3H-radicol-0.12      | 5/41   | $2.00 \times 10^{-5}$ | $2.95 \times 10^{-4}$ |
| LJP005 SKBR3 24H-radicol-0.12    | 6/70   | $2.28 \times 10^{-5}$ | $3.31 \times 10^{-4}$ |
| LJP005 MDAMB231 3H-radicol-1.11  | 5/43   | $2.53 \times 10^{-5}$ | $3.63 \times 10^{-4}$ |
| LJP005 HT29 24H-radicol-10       | 6/72   | $2.68 \times 10^{-5}$ | $3.80 \times 10^{-4}$ |
| LJP006 HME1 24H-radicol-0.12     | 7/111  | $3.50 \times 10^{-5}$ | $4.80 \times 10^{-4}$ |
| LJP006 LNCAP 3H-radicol-3.33     | 5/46   | $3.54 \times 10^{-5}$ | $4.83 \times 10^{-4}$ |
| LJP006 SKBR3 3H-radicol-0.04     | 4/24   | $3.98 \times 10^{-5}$ | $5.32 \times 10^{-4}$ |
| LJP006 MCF7 3H-radicol-10        | 5/48   | $4.36 \times 10^{-5}$ | $5.77 \times 10^{-4}$ |
| LJP006 HCC515 24H-radicol-3.33   | 6/79   | $4.54 \times 10^{-5}$ | $5.97 \times 10^{-4}$ |
| LJP006 MCF10A 3H-radicol-3.33    | 6/79   | $4.54 \times 10^{-5}$ | $5.97 \times 10^{-4}$ |
| LJP005 BT20 24H-radicol-10       | 9/204  | $4.63 \times 10^{-5}$ | $6.06 \times 10^{-4}$ |
| LJP006 PC3 24H-radicol-0.12      | 4/25   | $4.71 \times 10^{-5}$ | $6.14 \times 10^{-4}$ |
| LJP005 SKBR3 24H-radicol-0.37    | 7/119  | $5.47 \times 10^{-5}$ | $6.99 \times 10^{-4}$ |
| LJP005 MCF10A 24H-radicol-0.37   | 8/162  | $5.59 \times 10^{-5}$ | $7.11 \times 10^{-4}$ |
| LJP005 SKBR3 3H-radicol-0.37     | 5/53   | $7.07 \times 10^{-5}$ | $8.58 \times 10^{-4}$ |
| LJP006 MDAMB231 3H-radicol-1.11  | 4/29   | $8.61 \times 10^{-5}$ | $1.01 \times 10^{-3}$ |
| LJP006 SKBR3 24H-radicol-0.37    | 6/90   | $9.46 \times 10^{-5}$ | $1.10 \times 10^{-3}$ |
| LJP005 BT20 24H-radicol-3.33     | 6/92   | $1.07 \times 10^{-4}$ | $1.21 \times 10^{-3}$ |
| LJP006 LNCAP 3H-radicol-0.37     | 4/32   | $1.28 \times 10^{-4}$ | $1.40 \times 10^{-3}$ |
| LJP006 HT29 24H-radicol-10       | 5/60   | $1.29 \times 10^{-4}$ | $1.41 \times 10^{-3}$ |
| LJP006 A549 24H-radicol-0.37     | 4/33   | $1.45 \times 10^{-4}$ | $1.56 \times 10^{-3}$ |
| LJP006 HME1 3H-radicol-0.37      | 5/63   | $1.62 \times 10^{-4}$ | $1.71 \times 10^{-3}$ |
| LJP006 SKBR3 24H-radicol-1.11    | 6/100  | $1.69 \times 10^{-4}$ | $1.77 \times 10^{-3}$ |
| LJP005 HCC515 24H-radicol-1.11   | 5/64   | $1.75 \times 10^{-4}$ | $1.82 \times 10^{-3}$ |
| LJP006 HA1E 24H-radicol-10       | 9/248  | $2.05 \times 10^{-4}$ | $2.06 \times 10^{-3}$ |
| LJP006 LNCAP 3H-radicol-0.12     | 4/37   | $2.28 \times 10^{-4}$ | $2.27 \times 10^{-3}$ |
| LJP006 MDAMB231 3H-radicol-10    | 4/39   | $2.80 \times 10^{-4}$ | $2.71 \times 10^{-3}$ |
| LJP006 BT20 24H-radicol-3.33     | 7/155  | $2.84 \times 10^{-4}$ | $2.74 \times 10^{-3}$ |
| LJP006 MDAMB231 24H-radicol-3.33 | 5/72   | $3.05 \times 10^{-4}$ | $2.90 \times 10^{-3}$ |
| LJP005 MCF10A 3H-radicol-0.37    | 4/40   | $3.09 \times 10^{-4}$ | $2.94 \times 10^{-3}$ |

Table S12: (Continued)

|                                  |       |                       |                       |
|----------------------------------|-------|-----------------------|-----------------------|
| LJP005 HS578T 3H-radicol-1.11    | 4/41  | $3.40 \times 10^{-4}$ | $3.20 \times 10^{-3}$ |
| LJP005 SKBR3 3H-radicol-0.12     | 4/41  | $3.40 \times 10^{-4}$ | $3.19 \times 10^{-3}$ |
| LJP006 BT20 24H-radicol-0.12     | 4/42  | $3.74 \times 10^{-4}$ | $3.44 \times 10^{-3}$ |
| LJP006 BT20 24H-radicol-1.11     | 6/119 | $4.34 \times 10^{-4}$ | $3.91 \times 10^{-3}$ |
| LJP006 MCF7 24H-radicol-0.12     | 4/44  | $4.48 \times 10^{-4}$ | $4.00 \times 10^{-3}$ |
| LJP006 PC3 24H-radicol-3.33      | 5/80  | $4.97 \times 10^{-4}$ | $4.36 \times 10^{-3}$ |
| LJP006 PC3 24H-radicol-1.11      | 4/47  | $5.77 \times 10^{-4}$ | $4.95 \times 10^{-3}$ |
| LJP005 A375 24H-radicol-1.11     | 5/84  | $6.21 \times 10^{-4}$ | $5.28 \times 10^{-3}$ |
| LJP006 HS578T 24H-radicol-10     | 5/87  | $7.29 \times 10^{-4}$ | $6.05 \times 10^{-3}$ |
| LJP005 BT20 3H-radicol-0.12      | 3/22  | $7.30 \times 10^{-4}$ | $6.05 \times 10^{-3}$ |
| LJP006 A375 24H-radicol-10       | 6/132 | $7.51 \times 10^{-4}$ | $6.16 \times 10^{-3}$ |
| LJP005 MCF7 3H-radicol-0.37      | 4/52  | $8.49 \times 10^{-4}$ | $6.84 \times 10^{-3}$ |
| LJP005 HA1E 24H-radicol-0.12     | 4/53  | $9.12 \times 10^{-4}$ | $7.26 \times 10^{-3}$ |
| LJP006 SKBR3 3H-radicol-0.37     | 3/24  | $9.48 \times 10^{-4}$ | $7.49 \times 10^{-3}$ |
| LJP005 BT20 3H-radicol-3.33      | 4/54  | $9.79 \times 10^{-4}$ | $7.71 \times 10^{-3}$ |
| LJP005 MDAMB231 3H-radicol-10    | 4/54  | $9.79 \times 10^{-4}$ | $7.69 \times 10^{-3}$ |
| LJP005 MDAMB231 24H-radicol-0.37 | 3/25  | $1.07 \times 10^{-3}$ | $8.28 \times 10^{-3}$ |
| LJP005 HS578T 24H-radicol-10     | 5/96  | $1.14 \times 10^{-3}$ | $8.67 \times 10^{-3}$ |
| LJP006 MDAMB231 3H-radicol-0.04  | 3/26  | $1.20 \times 10^{-3}$ | $9.07 \times 10^{-3}$ |
| LJP005 MCF7 3H-radicol-10        | 4/61  | $1.55 \times 10^{-3}$ | $1.11 \times 10^{-2}$ |
| LJP005 MDAMB231 3H-radicol-3.33  | 3/29  | $1.66 \times 10^{-3}$ | $1.18 \times 10^{-2}$ |
| LJP006 HME1 24H-radicol-1.11     | 5/108 | $1.92 \times 10^{-3}$ | $1.33 \times 10^{-2}$ |
| LJP005 HEPG2 24H-radicol-0.37    | 4/67  | $2.19 \times 10^{-3}$ | $1.49 \times 10^{-2}$ |
| LJP005 HS578T 3H-radicol-0.12    | 3/32  | $2.22 \times 10^{-3}$ | $1.50 \times 10^{-2}$ |
| LJP006 MDAMB231 3H-radicol-0.37  | 3/32  | $2.22 \times 10^{-3}$ | $1.50 \times 10^{-2}$ |
| LJP006 MDAMB231 24H-radicol-1.11 | 4/68  | $2.31 \times 10^{-3}$ | $1.55 \times 10^{-2}$ |
| LJP005 MDAMB231 24H-radicol-1.11 | 3/34  | $2.64 \times 10^{-3}$ | $1.74 \times 10^{-2}$ |
| LJP006 HS578T 3H-radicol-0.12    | 3/34  | $2.64 \times 10^{-3}$ | $1.73 \times 10^{-2}$ |
| LJP005 BT20 24H-radicol-0.12     | 3/35  | $2.87 \times 10^{-3}$ | $1.86 \times 10^{-2}$ |
| LJP005 HS578T 3H-radicol-0.04    | 3/39  | $3.92 \times 10^{-3}$ | $2.38 \times 10^{-2}$ |
| LJP006 HS578T 3H-radicol-3.33    | 3/41  | $4.51 \times 10^{-3}$ | $2.66 \times 10^{-2}$ |
| LJP006 LNCAP 3H-radicol-1.11     | 3/41  | $4.51 \times 10^{-3}$ | $2.65 \times 10^{-2}$ |
| LJP006 LNCAP 24H-radicol-1.11    | 4/84  | $4.95 \times 10^{-3}$ | $2.84 \times 10^{-2}$ |
| LJP005 HS578T 3H-radicol-3.33    | 3/44  | $5.51 \times 10^{-3}$ | $3.09 \times 10^{-2}$ |
| LJP006 HA1E 24H-radicol-1.11     | 4/88  | $5.83 \times 10^{-3}$ | $3.24 \times 10^{-2}$ |
| LJP006 A375 24H-radicol-0.37     | 4/89  | $6.07 \times 10^{-3}$ | $3.33 \times 10^{-2}$ |
| LJP005 HA1E 24H-radicol-1.11     | 4/94  | $7.35 \times 10^{-3}$ | $3.89 \times 10^{-2}$ |
| LJP005 HS578T 24H-radicol-0.37   | 3/49  | $7.44 \times 10^{-3}$ | $3.92 \times 10^{-2}$ |
| LJP005 MCF7 24H-radicol-0.37     | 3/49  | $7.44 \times 10^{-3}$ | $3.92 \times 10^{-2}$ |
| LJP006 BT20 24H-radicol-0.37     | 3/50  | $7.87 \times 10^{-3}$ | $4.10 \times 10^{-2}$ |
| LJP005 HCC515 24H-radicol-0.37   | 3/53  | $9.24 \times 10^{-3}$ | $4.63 \times 10^{-2}$ |
| LJP006 LNCAP 3H-radicol-10       | 3/53  | $9.24 \times 10^{-3}$ | $4.62 \times 10^{-2}$ |
| LJP006 HS578T 3H-radicol-10      | 3/54  | $9.73 \times 10^{-3}$ | $4.82 \times 10^{-2}$ |

Table S13: Radicicol significantly affects the expression of the selected 163 genes as evident in the ‘LINCS L1000 Chem Pert down’ category in Enrichr. The last number after the - is dose density.

| Term                               | Overlap | P-value                | Adjusted P-value       |
|------------------------------------|---------|------------------------|------------------------|
| LINCS L1000 Chem Pert down         |         |                        |                        |
| LJP006 HA1E 24H-radicicol-3.33     | 22/160  | $6.04 \times 10^{-21}$ | $1.00 \times 10^{-16}$ |
| LJP005 HS578T 24H-radicicol-10     | 16/109  | $5.56 \times 10^{-16}$ | $6.14 \times 10^{-13}$ |
| LJP005 HS578T 24H-radicicol-3.33   | 15/98   | $2.46 \times 10^{-15}$ | $2.09 \times 10^{-12}$ |
| LJP005 SKBR3 24H-radicicol-0.12    | 11/56   | $8.13 \times 10^{-13}$ | $2.23 \times 10^{-10}$ |
| LJP005 SKBR3 24H-radicicol-0.37    | 13/106  | $3.57 \times 10^{-12}$ | $7.25 \times 10^{-10}$ |
| LJP005 HA1E 24H-radicicol-3.33     | 14/132  | $3.87 \times 10^{-12}$ | $7.68 \times 10^{-10}$ |
| LJP006 A375 24H-radicicol-0.37     | 14/133  | $4.30 \times 10^{-12}$ | $8.23 \times 10^{-10}$ |
| LJP006 MDAMB231 24H-radicicol-10   | 13/108  | $4.55 \times 10^{-12}$ | $8.52 \times 10^{-10}$ |
| LJP006 MCF10A 3H-radicicol-1.11    | 12/95   | $1.74 \times 10^{-11}$ | $2.48 \times 10^{-9}$  |
| LJP006 HS578T 24H-radicicol-10     | 13/128  | $4.07 \times 10^{-11}$ | $5.13 \times 10^{-9}$  |
| LJP006 MCF10A 24H-radicicol-10     | 15/190  | $4.67 \times 10^{-11}$ | $5.75 \times 10^{-9}$  |
| LJP005 MDAMB231 24H-radicicol-3.33 | 12/107  | $7.25 \times 10^{-11}$ | $8.14 \times 10^{-9}$  |
| LJP006 SKBR3 24H-radicicol-0.37    | 12/108  | $8.10 \times 10^{-11}$ | $8.71 \times 10^{-9}$  |
| LJP006 HS578T 24H-radicicol-3.33   | 12/115  | $1.71 \times 10^{-10}$ | $1.61 \times 10^{-8}$  |
| LJP006 HCC515 24H-radicicol-10     | 13/158  | $5.76 \times 10^{-10}$ | $4.45 \times 10^{-8}$  |
| LJP005 PC3 24H-radicicol-1.11      | 9/58    | $9.61 \times 10^{-10}$ | $6.80 \times 10^{-8}$  |
| LJP005 A375 24H-radicicol-1.11     | 12/134  | $1.02 \times 10^{-9}$  | $7.15 \times 10^{-8}$  |
| LJP005 A549 24H-radicicol-10       | 12/142  | $1.99 \times 10^{-9}$  | $1.25 \times 10^{-7}$  |
| LJP005 MCF10A 3H-radicicol-3.33    | 10/90   | $3.20 \times 10^{-9}$  | $1.85 \times 10^{-7}$  |
| LJP006 MCF10A 3H-radicicol-0.12    | 9/71    | $6.14 \times 10^{-9}$  | $3.19 \times 10^{-7}$  |
| LJP006 BT20 24H-radicicol-0.37     | 9/75    | $1.01 \times 10^{-8}$  | $4.86 \times 10^{-7}$  |
| LJP005 SKBR3 24H-radicicol-1.11    | 10/103  | $1.21 \times 10^{-8}$  | $5.66 \times 10^{-7}$  |
| LJP006 SKBR3 24H-radicicol-1.11    | 10/106  | $1.59 \times 10^{-8}$  | $7.07 \times 10^{-7}$  |
| LJP006 SKBR3 24H-radicicol-0.12    | 8/56    | $1.67 \times 10^{-8}$  | $7.35 \times 10^{-7}$  |
| LJP005 MCF10A 3H-radicicol-0.37    | 9/80    | $1.80 \times 10^{-8}$  | $7.82 \times 10^{-7}$  |
| LJP006 HME1 24H-radicicol-3.33     | 12/177  | $2.42 \times 10^{-8}$  | $9.96 \times 10^{-7}$  |
| LJP006 BT20 24H-radicicol-1.11     | 9/86    | $3.42 \times 10^{-8}$  | $1.34 \times 10^{-6}$  |
| LJP006 SKBR3 24H-radicicol-3.33    | 10/122  | $6.17 \times 10^{-8}$  | $2.24 \times 10^{-6}$  |
| LJP006 HS578T 3H-radicicol-0.37    | 7/44    | $6.24 \times 10^{-8}$  | $2.25 \times 10^{-6}$  |
| LJP006 MCF10A 3H-radicicol-3.33    | 9/93    | $6.81 \times 10^{-8}$  | $2.42 \times 10^{-6}$  |
| LJP006 HA1E 24H-radicicol-1.11     | 11/158  | $7.20 \times 10^{-8}$  | $2.53 \times 10^{-6}$  |
| LJP005 PC3 24H-radicicol-0.37      | 7/46    | $8.60 \times 10^{-8}$  | $2.95 \times 10^{-6}$  |
| LJP006 A549 24H-radicicol-10       | 10/131  | $1.21 \times 10^{-7}$  | $3.95 \times 10^{-6}$  |
| LJP006 HME1 24H-radicicol-1.11     | 10/131  | $1.21 \times 10^{-7}$  | $3.94 \times 10^{-6}$  |
| LJP005 MCF10A 24H-radicicol-10     | 12/212  | $1.76 \times 10^{-7}$  | $5.44 \times 10^{-6}$  |
| LJP006 HS578T 24H-radicicol-1.11   | 9/106   | $2.12 \times 10^{-7}$  | $6.37 \times 10^{-6}$  |
| LJP005 BT20 24H-radicicol-0.37     | 7/55    | $3.07 \times 10^{-7}$  | $8.59 \times 10^{-6}$  |
| LJP006 MDAMB231 24H-radicicol-3.33 | 8/82    | $3.50 \times 10^{-7}$  | $9.56 \times 10^{-6}$  |
| LJP005 HA1E 24H-radicicol-1.11     | 10/147  | $3.57 \times 10^{-7}$  | $9.68 \times 10^{-6}$  |
| LJP006 HME1 3H-radicicol-0.37      | 7/57    | $3.94 \times 10^{-7}$  | $1.06 \times 10^{-5}$  |
| LJP006 HA1E 24H-radicicol-10       | 9/114   | $3.97 \times 10^{-7}$  | $1.06 \times 10^{-5}$  |
| LJP005 HCC515 24H-radicicol-10     | 10/154  | $5.49 \times 10^{-7}$  | $1.39 \times 10^{-5}$  |
| LJP006 HS578T 3H-radicicol-3.33    | 6/44    | $1.46 \times 10^{-6}$  | $3.18 \times 10^{-5}$  |
| LJP005 A375 24H-radicicol-0.37     | 8/99    | $1.50 \times 10^{-6}$  | $3.24 \times 10^{-5}$  |
| LJP005 HA1E 24H-radicicol-0.37     | 7/71    | $1.80 \times 10^{-6}$  | $3.79 \times 10^{-5}$  |
| LJP005 MCF10A 3H-radicicol-1.11    | 7/77    | $3.13 \times 10^{-6}$  | $6.01 \times 10^{-5}$  |
| LJP006 BT20 24H-radicicol-3.33     | 8/110   | $3.32 \times 10^{-6}$  | $6.32 \times 10^{-5}$  |
| LJP006 A375 24H-radicicol-0.12     | 7/78    | $3.41 \times 10^{-6}$  | $6.47 \times 10^{-5}$  |
| LJP005 HS578T 3H-radicicol-3.33    | 5/32    | $5.70 \times 10^{-6}$  | $1.00 \times 10^{-4}$  |
| LJP005 MCF10A 3H-radicicol-10      | 7/92    | $1.03 \times 10^{-5}$  | $1.66 \times 10^{-4}$  |
| LJP006 MCF7 3H-radicicol-10        | 5/40    | $1.77 \times 10^{-5}$  | $2.63 \times 10^{-4}$  |
| LJP006 MCF7 24H-radicicol-1.11     | 7/103   | $2.16 \times 10^{-5}$  | $3.12 \times 10^{-4}$  |
| LJP006 MCF10A 3H-radicicol-0.37    | 6/70    | $2.28 \times 10^{-5}$  | $3.26 \times 10^{-4}$  |

Table S13: (Continued)

|                                    |       |                       |                       |
|------------------------------------|-------|-----------------------|-----------------------|
| LJP005 SKBR3 24H-radicicol-3.33    | 8/144 | $2.41 \times 10^{-5}$ | $3.44 \times 10^{-4}$ |
| LJP005 PC3 24H-radicicol-10        | 7/105 | $2.45 \times 10^{-5}$ | $3.49 \times 10^{-4}$ |
| LJP006 HS578T 3H-radicicol-10      | 6/72  | $2.68 \times 10^{-5}$ | $3.77 \times 10^{-4}$ |
| LJP006 HS578T 3H-radicicol-0.12    | 4/22  | $2.77 \times 10^{-5}$ | $3.88 \times 10^{-4}$ |
| LJP005 HCC515 24H-radicicol-1.11   | 6/75  | $3.38 \times 10^{-5}$ | $4.60 \times 10^{-4}$ |
| LJP006 PC3 24H-radicicol-1.11      | 6/75  | $3.38 \times 10^{-5}$ | $4.58 \times 10^{-4}$ |
| LJP005 MDAMB231 3H-radicicol-3.33  | 4/24  | $3.98 \times 10^{-5}$ | $5.21 \times 10^{-4}$ |
| LJP006 PC3 24H-radicicol-3.33      | 6/78  | $4.23 \times 10^{-5}$ | $5.50 \times 10^{-4}$ |
| LJP005 A375 24H-radicicol-10       | 5/48  | $4.36 \times 10^{-5}$ | $5.66 \times 10^{-4}$ |
| LJP005 MCF10A 3H-radicicol-0.12    | 5/48  | $4.36 \times 10^{-5}$ | $5.66 \times 10^{-4}$ |
| LJP005 HCC515 24H-radicicol-0.37   | 6/80  | $4.88 \times 10^{-5}$ | $6.21 \times 10^{-4}$ |
| LJP006 MCF10A 3H-radicicol-10      | 6/82  | $5.61 \times 10^{-5}$ | $6.99 \times 10^{-4}$ |
| LJP005 HA1E 24H-radicicol-10       | 6/85  | $6.87 \times 10^{-5}$ | $8.30 \times 10^{-4}$ |
| LJP005 SKBR3 3H-radicicol-3.33     | 5/53  | $7.07 \times 10^{-5}$ | $8.49 \times 10^{-4}$ |
| LJP005 HEPG2 24H-radicicol-1.11    | 8/168 | $7.23 \times 10^{-5}$ | $8.63 \times 10^{-4}$ |
| LJP006 HEPG2 24H-radicicol-1.11    | 6/86  | $7.33 \times 10^{-5}$ | $8.74 \times 10^{-4}$ |
| LJP005 MDAMB231 3H-radicicol-10    | 5/54  | $7.75 \times 10^{-5}$ | $9.16 \times 10^{-4}$ |
| LJP006 A375 24H-radicicol-1.11     | 7/132 | $1.05 \times 10^{-4}$ | $1.18 \times 10^{-3}$ |
| LJP006 HME1 24H-radicicol-0.37     | 7/132 | $1.05 \times 10^{-4}$ | $1.18 \times 10^{-3}$ |
| LJP005 BT20 24H-radicicol-0.12     | 5/59  | $1.19 \times 10^{-4}$ | $1.30 \times 10^{-3}$ |
| LJP006 MDAMB231 24H-radicicol-1.11 | 6/97  | $1.43 \times 10^{-4}$ | $1.52 \times 10^{-3}$ |
| LJP006 HCC515 24H-radicicol-3.33   | 6/98  | $1.52 \times 10^{-4}$ | $1.59 \times 10^{-3}$ |
| LJP006 HME1 3H-radicicol-1.11      | 5/64  | $1.75 \times 10^{-4}$ | $1.81 \times 10^{-3}$ |
| LJP005 HS578T 3H-radicicol-10      | 4/35  | $1.83 \times 10^{-4}$ | $1.88 \times 10^{-3}$ |
| LJP005 HS578T 3H-radicicol-1.11    | 4/36  | $2.04 \times 10^{-4}$ | $2.06 \times 10^{-3}$ |
| LJP005 SKBR3 3H-radicicol-0.12     | 5/69  | $2.49 \times 10^{-4}$ | $2.45 \times 10^{-3}$ |
| LJP005 MCF7 24H-radicicol-1.11     | 6/108 | $2.58 \times 10^{-4}$ | $2.51 \times 10^{-3}$ |
| LJP005 SKBR3 24H-radicicol-0.04    | 5/71  | $2.85 \times 10^{-4}$ | $2.73 \times 10^{-3}$ |
| LJP006 HCC515 24H-radicicol-0.37   | 4/40  | $3.09 \times 10^{-4}$ | $2.93 \times 10^{-3}$ |
| LJP006 HS578T 3H-radicicol-1.11    | 4/40  | $3.09 \times 10^{-4}$ | $2.93 \times 10^{-3}$ |
| LJP005 MCF7 24H-radicicol-0.12     | 4/41  | $3.40 \times 10^{-4}$ | $3.17 \times 10^{-3}$ |
| LJP006 BT20 24H-radicicol-0.12     | 4/42  | $3.74 \times 10^{-4}$ | $3.42 \times 10^{-3}$ |
| LJP006 MCF7 24H-radicicol-10       | 8/216 | $4.03 \times 10^{-4}$ | $3.65 \times 10^{-3}$ |
| LJP006 MDAMB231 3H-radicicol-10    | 4/46  | $5.31 \times 10^{-4}$ | $4.59 \times 10^{-3}$ |
| LJP006 SKBR3 3H-radicicol-0.37     | 3/20  | $5.47 \times 10^{-4}$ | $4.71 \times 10^{-3}$ |
| LJP006 HEPG2 24H-radicicol-0.37    | 4/47  | $5.77 \times 10^{-4}$ | $4.92 \times 10^{-3}$ |
| LJP005 MCF10A 24H-radicicol-3.33   | 7/175 | $5.90 \times 10^{-4}$ | $5.00 \times 10^{-3}$ |
| LJP006 BT20 3H-radicicol-10        | 3/21  | $6.35 \times 10^{-4}$ | $5.31 \times 10^{-3}$ |
| LJP006 A549 24H-radicicol-0.12     | 3/23  | $8.35 \times 10^{-4}$ | $6.72 \times 10^{-3}$ |
| LJP005 SKBR3 3H-radicicol-1.11     | 4/52  | $8.49 \times 10^{-4}$ | $6.80 \times 10^{-3}$ |
| LJP006 SKBR3 3H-radicicol-0.12     | 3/25  | $1.07 \times 10^{-3}$ | $8.26 \times 10^{-3}$ |
| LJP006 HCC515 24H-radicicol-1.11   | 5/96  | $1.14 \times 10^{-3}$ | $8.70 \times 10^{-3}$ |
| LJP005 BT20 24H-radicicol-10       | 6/149 | $1.41 \times 10^{-3}$ | $1.04 \times 10^{-2}$ |
| LJP005 BT20 24H-radicicol-3.33     | 4/60  | $1.45 \times 10^{-3}$ | $1.07 \times 10^{-2}$ |
| LJP006 MDAMB231 3H-radicicol-1.11  | 3/29  | $1.66 \times 10^{-3}$ | $1.19 \times 10^{-2}$ |
| LJP005 A375 24H-radicicol-0.12     | 4/65  | $1.96 \times 10^{-3}$ | $1.37 \times 10^{-2}$ |
| LJP006 HA1E 24H-radicicol-0.37     | 4/67  | $2.19 \times 10^{-3}$ | $1.50 \times 10^{-2}$ |
| LJP005 HA1E 24H-radicicol-0.12     | 3/33  | $2.42 \times 10^{-3}$ | $1.63 \times 10^{-2}$ |
| LJP006 A549 24H-radicicol-0.37     | 3/33  | $2.42 \times 10^{-3}$ | $1.63 \times 10^{-2}$ |
| LJP006 HME1 24H-radicicol-10       | 5/114 | $2.43 \times 10^{-3}$ | $1.63 \times 10^{-2}$ |
| LJP006 LNCAP 24H-radicicol-0.37    | 5/119 | $2.93 \times 10^{-3}$ | $1.90 \times 10^{-2}$ |
| LJP006 HME1 3H-radicicol-0.12      | 3/36  | $3.11 \times 10^{-3}$ | $2.00 \times 10^{-2}$ |
| LJP006 MDAMB231 3H-radicicol-3.33  | 3/36  | $3.11 \times 10^{-3}$ | $2.00 \times 10^{-2}$ |
| LJP006 BT20 24H-radicicol-10       | 5/122 | $3.26 \times 10^{-3}$ | $2.08 \times 10^{-2}$ |
| LJP005 PC3 24H-radicicol-3.33      | 4/77  | $3.63 \times 10^{-3}$ | $2.27 \times 10^{-2}$ |

Table S13: (Continued)

|                                   |       |                       |                       |
|-----------------------------------|-------|-----------------------|-----------------------|
| LJP005 BT20 24H-radicicol-1.11    | 4/78  | $3.80 \times 10^{-3}$ | $2.36 \times 10^{-2}$ |
| LJP005 MDAMB231 24H-radicicol-10  | 3/39  | $3.92 \times 10^{-3}$ | $2.41 \times 10^{-2}$ |
| LJP005 HS578T 24H-radicicol-0.37  | 3/40  | $4.21 \times 10^{-3}$ | $2.55 \times 10^{-2}$ |
| LJP005 HEPG2 24H-radicicol-0.37   | 4/81  | $4.35 \times 10^{-3}$ | $2.62 \times 10^{-2}$ |
| LJP006 LNCAP 3H-radicicol-0.37    | 3/41  | $4.51 \times 10^{-3}$ | $2.70 \times 10^{-2}$ |
| LJP006 HME1 3H-radicicol-10       | 4/85  | $5.16 \times 10^{-3}$ | $3.01 \times 10^{-2}$ |
| LJP005 MDAMB231 3H-radicicol-0.12 | 3/44  | $5.51 \times 10^{-3}$ | $3.16 \times 10^{-2}$ |
| LJP006 MCF10A 3H-radicicol-0.04   | 3/47  | $6.63 \times 10^{-3}$ | $3.64 \times 10^{-2}$ |
| LJP005 SKBR3 3H-radicicol-0.04    | 3/50  | $7.87 \times 10^{-3}$ | $4.18 \times 10^{-2}$ |
| LJP006 SKBR3 24H-radicicol-10     | 5/151 | $7.98 \times 10^{-3}$ | $4.23 \times 10^{-2}$ |
| LJP005 HS578T 3H-radicicol-0.04   | 2/17  | $8.29 \times 10^{-3}$ | $4.37 \times 10^{-2}$ |
| LJP005 MCF7 24H-radicicol-10      | 6/219 | $9.23 \times 10^{-3}$ | $4.76 \times 10^{-2}$ |
| LJP005 HCC515 24H-radicicol-3.33  | 4/101 | $9.42 \times 10^{-3}$ | $4.82 \times 10^{-2}$ |
| LJP006 HME1 24H-radicicol-0.12    | 4/101 | $9.42 \times 10^{-3}$ | $4.81 \times 10^{-2}$ |

Table S14: A443654 significantly affects the expression of the selected 163 genes as evident in the ‘LINCS L1000 Chem Pert up’ category in Enrichr. The last number after the - is dose density.

| Term                            | Overlap | P-value               | Adjusted P-value      |
|---------------------------------|---------|-----------------------|-----------------------|
| LINCS L1000 Chem Pert up        |         |                       |                       |
| LJP006 HCC515 24H-A443654-0.37  | 9/145   | $2.99 \times 10^{-6}$ | $6.13 \times 10^{-5}$ |
| LJP006 HCC515 24H-A443654-0.12  | 7/88    | $7.66 \times 10^{-6}$ | $1.33 \times 10^{-4}$ |
| LJP006 MCF10A 3H-A443654-0.37   | 6/67    | $1.77 \times 10^{-5}$ | $2.66 \times 10^{-4}$ |
| LJP006 PC3 24H-A443654-1.11     | 9/200   | $3.97 \times 10^{-5}$ | $5.32 \times 10^{-4}$ |
| LJP006 HCC515 24H-A443654-10    | 9/203   | $4.45 \times 10^{-5}$ | $5.87 \times 10^{-4}$ |
| LJP006 HS578T 3H-A443654-1.11   | 5/54    | $7.75 \times 10^{-5}$ | $9.27 \times 10^{-4}$ |
| LJP006 HT29 24H-A443654-1.11    | 7/126   | $7.87 \times 10^{-5}$ | $9.36 \times 10^{-4}$ |
| LJP006 MCF7 3H-A443654-0.12     | 6/89    | $8.89 \times 10^{-5}$ | $1.04 \times 10^{-3}$ |
| LJP006 MCF7 3H-A443654-10       | 4/33    | $1.45 \times 10^{-4}$ | $1.56 \times 10^{-3}$ |
| LJP006 MCF7 3H-A443654-3.33     | 5/64    | $1.75 \times 10^{-4}$ | $1.82 \times 10^{-3}$ |
| LJP006 HT29 24H-A443654-0.37    | 4/41    | $3.40 \times 10^{-4}$ | $3.18 \times 10^{-3}$ |
| LJP006 SKBR3 3H-A443654-0.37    | 4/42    | $3.74 \times 10^{-4}$ | $3.44 \times 10^{-3}$ |
| LJP006 MCF7 24H-A443654-0.37    | 6/118   | $4.15 \times 10^{-4}$ | $3.76 \times 10^{-3}$ |
| LJP006 LNCAP 24H-A443654-3.33   | 6/119   | $4.34 \times 10^{-4}$ | $3.91 \times 10^{-3}$ |
| LJP006 A549 24H-A443654-10      | 7/169   | $4.80 \times 10^{-4}$ | $4.24 \times 10^{-3}$ |
| LJP006 MDAMB231 3H-A443654-0.37 | 4/47    | $5.77 \times 10^{-4}$ | $4.95 \times 10^{-3}$ |
| LJP006 PC3 24H-A443654-0.37     | 5/83    | $5.88 \times 10^{-4}$ | $5.02 \times 10^{-3}$ |
| LJP006 MCF7 24H-A443654-0.12    | 5/91    | $8.94 \times 10^{-4}$ | $7.15 \times 10^{-3}$ |
| LJP006 MCF7 24H-A443654-3.33    | 5/92    | $9.40 \times 10^{-4}$ | $7.45 \times 10^{-3}$ |
| LJP006 MCF7 24H-A443654-1.11    | 5/95    | $1.09 \times 10^{-3}$ | $8.35 \times 10^{-3}$ |
| LJP006 BT20 3H-A443654-0.12     | 4/56    | $1.12 \times 10^{-3}$ | $8.59 \times 10^{-3}$ |
| LJP006 A549 24H-A443654-1.11    | 6/150   | $1.46 \times 10^{-3}$ | $1.06 \times 10^{-2}$ |
| LJP006 MDAMB231 3H-A443654-0.12 | 3/30    | $1.84 \times 10^{-3}$ | $1.28 \times 10^{-2}$ |
| LJP006 LNCAP 24H-A443654-0.37   | 5/108   | $1.92 \times 10^{-3}$ | $1.33 \times 10^{-2}$ |
| LJP006 BT20 24H-A443654-0.37    | 6/164   | $2.29 \times 10^{-3}$ | $1.54 \times 10^{-2}$ |
| LJP006 BT20 24H-A443654-1.11    | 5/113   | $2.34 \times 10^{-3}$ | $1.56 \times 10^{-2}$ |
| LJP006 HME1 24H-A443654-0.04    | 4/70    | $2.57 \times 10^{-3}$ | $1.70 \times 10^{-2}$ |
| LJP006 SKBR3 24H-A443654-0.37   | 5/116   | $2.62 \times 10^{-3}$ | $1.73 \times 10^{-2}$ |
| LJP006 BT20 24H-A443654-3.33    | 5/117   | $2.72 \times 10^{-3}$ | $1.77 \times 10^{-2}$ |
| LJP006 SKBR3 24H-A443654-0.04   | 4/74    | $3.14 \times 10^{-3}$ | $1.99 \times 10^{-2}$ |
| LJP006 HEPG2 24H-A443654-0.37   | 4/81    | $4.35 \times 10^{-3}$ | $2.57 \times 10^{-2}$ |
| LJP006 MCF7 3H-A443654-0.37     | 3/42    | $4.83 \times 10^{-3}$ | $2.79 \times 10^{-2}$ |
| LJP006 SKBR3 3H-A443654-3.33    | 3/43    | $5.16 \times 10^{-3}$ | $2.93 \times 10^{-2}$ |
| LJP006 HCC515 24H-A443654-3.33  | 6/211   | $7.76 \times 10^{-3}$ | $4.06 \times 10^{-2}$ |
| LJP006 LNCAP 3H-A443654-10      | 3/50    | $7.87 \times 10^{-3}$ | $4.09 \times 10^{-2}$ |
| LJP006 HT29 24H-A443654-3.33    | 5/155   | $8.87 \times 10^{-3}$ | $4.48 \times 10^{-2}$ |



Table S15: A443654 significantly affects the expression of the selected 163 genes due to ‘LINCS L1000 Chem Pert down’ category in Enrichr. The last number after the - is dose density.

| Term                             | Overlap | P-value                | Adjusted P-value       |
|----------------------------------|---------|------------------------|------------------------|
| LINCS L1000 Chem Pert down       |         |                        |                        |
| LJP006 BT20 24H-A443654-1.11     | 19/117  | $1.22 \times 10^{-19}$ | $1.01 \times 10^{-15}$ |
| LJP006 SKBR3 24H-A443654-3.33    | 16/114  | $1.16 \times 10^{-15}$ | $1.04 \times 10^{-12}$ |
| LJP006 HEPG2 24H-A443654-10      | 14/102  | $1.04 \times 10^{-13}$ | $3.99 \times 10^{-11}$ |
| LJP006 BT20 24H-A443654-3.33     | 13/92   | $5.52 \times 10^{-13}$ | $1.59 \times 10^{-10}$ |
| LJP006 HCC515 24H-A443654-1.11   | 15/145  | $9.24 \times 10^{-13}$ | $2.49 \times 10^{-10}$ |
| LJP006 SKBR3 24H-A443654-1.11    | 13/119  | $1.60 \times 10^{-11}$ | $2.31 \times 10^{-9}$  |
| LJP006 HA1E 24H-A443654-0.04     | 13/139  | $1.16 \times 10^{-10}$ | $1.18 \times 10^{-8}$  |
| LJP006 HA1E 24H-A443654-1.11     | 12/114  | $1.54 \times 10^{-10}$ | $1.49 \times 10^{-8}$  |
| LJP006 HA1E 24H-A443654-0.37     | 13/147  | $2.34 \times 10^{-10}$ | $2.12 \times 10^{-8}$  |
| LJP006 MCF10A 3H-A443654-10      | 11/101  | $6.34 \times 10^{-10}$ | $4.83 \times 10^{-8}$  |
| LJP006 LNCAP 24H-A443654-1.11    | 12/132  | $8.57 \times 10^{-10}$ | $6.19 \times 10^{-8}$  |
| LJP006 PC3 24H-A443654-1.11      | 13/175  | $2.03 \times 10^{-9}$  | $1.27 \times 10^{-7}$  |
| LJP006 LNCAP 24H-A443654-0.12    | 10/86   | $2.04 \times 10^{-9}$  | $1.27 \times 10^{-7}$  |
| LJP006 HCC515 24H-A443654-10     | 11/114  | $2.34 \times 10^{-9}$  | $1.42 \times 10^{-7}$  |
| LJP006 HA1E 24H-A443654-0.12     | 11/125  | $6.25 \times 10^{-9}$  | $3.24 \times 10^{-7}$  |
| LJP006 MCF10A 24H-A443654-0.37   | 10/107  | $1.75 \times 10^{-8}$  | $7.66 \times 10^{-7}$  |
| LJP006 HCC515 24H-A443654-3.33   | 10/111  | $2.49 \times 10^{-8}$  | $1.02 \times 10^{-6}$  |
| LJP006 BT20 24H-A443654-10       | 9/83    | $2.49 \times 10^{-8}$  | $1.02 \times 10^{-6}$  |
| LJP006 HEPG2 24H-A443654-3.33    | 10/117  | $4.13 \times 10^{-8}$  | $1.59 \times 10^{-6}$  |
| LJP006 MDAMB231 3H-A443654-10    | 10/118  | $4.49 \times 10^{-8}$  | $1.71 \times 10^{-6}$  |
| LJP006 HA1E 24H-A443654-3.33     | 8/64    | $4.92 \times 10^{-8}$  | $1.85 \times 10^{-6}$  |
| LJP006 A375 24H-A443654-1.11     | 8/68    | $8.00 \times 10^{-8}$  | $2.78 \times 10^{-6}$  |
| LJP006 A549 24H-A443654-10       | 8/70    | $1.01 \times 10^{-7}$  | $3.36 \times 10^{-6}$  |
| LJP006 MCF10A 3H-A443654-1.11    | 8/72    | $1.26 \times 10^{-7}$  | $4.08 \times 10^{-6}$  |
| LJP006 BT20 24H-A443654-0.04     | 9/112   | $3.41 \times 10^{-7}$  | $9.39 \times 10^{-6}$  |
| LJP006 HME1 24H-A443654-3.33     | 7/57    | $3.94 \times 10^{-7}$  | $1.06 \times 10^{-5}$  |
| LJP006 HS578T 24H-A443654-0.12   | 8/85    | $4.63 \times 10^{-7}$  | $1.20 \times 10^{-5}$  |
| LJP006 HME1 3H-A443654-0.12      | 6/37    | $5.04 \times 10^{-7}$  | $1.29 \times 10^{-5}$  |
| LJP006 HME1 24H-A443654-1.11     | 7/61    | $6.33 \times 10^{-7}$  | $1.56 \times 10^{-5}$  |
| LJP006 HME1 24H-A443654-10       | 6/39    | $6.98 \times 10^{-7}$  | $1.70 \times 10^{-5}$  |
| LJP006 LNCAP 24H-A443654-3.33    | 7/63    | $7.91 \times 10^{-7}$  | $1.89 \times 10^{-5}$  |
| LJP006 PC3 24H-A443654-3.33      | 9/124   | $8.10 \times 10^{-7}$  | $1.93 \times 10^{-5}$  |
| LJP006 HME1 3H-A443654-3.33      | 8/93    | $9.27 \times 10^{-7}$  | $2.17 \times 10^{-5}$  |
| LJP006 HME1 3H-A443654-1.11      | 9/142   | $2.52 \times 10^{-6}$  | $4.99 \times 10^{-5}$  |
| LJP006 HME1 24H-A443654-0.04     | 7/75    | $2.62 \times 10^{-6}$  | $5.16 \times 10^{-5}$  |
| LJP006 MDAMB231 3H-A443654-0.37  | 6/49    | $2.80 \times 10^{-6}$  | $5.46 \times 10^{-5}$  |
| LJP006 SKBR3 24H-A443654-0.04    | 7/77    | $3.13 \times 10^{-6}$  | $6.00 \times 10^{-5}$  |
| LJP006 HS578T 24H-A443654-0.04   | 6/52    | $3.99 \times 10^{-6}$  | $7.41 \times 10^{-5}$  |
| LJP006 HS578T 24H-A443654-0.37   | 8/115   | $4.63 \times 10^{-6}$  | $8.43 \times 10^{-5}$  |
| LJP006 BT20 3H-A443654-1.11      | 6/54    | $4.99 \times 10^{-6}$  | $8.98 \times 10^{-5}$  |
| LJP006 SKBR3 3H-A443654-3.33     | 6/56    | $6.19 \times 10^{-6}$  | $1.07 \times 10^{-4}$  |
| LJP006 SKBR3 3H-A443654-1.11     | 6/56    | $6.19 \times 10^{-6}$  | $1.07 \times 10^{-4}$  |
| LJP006 LNCAP 3H-A443654-1.11     | 6/58    | $7.62 \times 10^{-6}$  | $1.29 \times 10^{-4}$  |
| LJP006 SKBR3 24H-A443654-0.37    | 8/126   | $9.11 \times 10^{-6}$  | $1.49 \times 10^{-4}$  |
| LJP006 MDAMB231 24H-A443654-1.11 | 6/64    | $1.36 \times 10^{-5}$  | $2.10 \times 10^{-4}$  |
| LJP006 MCF7 3H-A443654-10        | 6/66    | $1.62 \times 10^{-5}$  | $2.44 \times 10^{-4}$  |
| LJP006 A549 24H-A443654-0.12     | 7/99    | $1.67 \times 10^{-5}$  | $2.50 \times 10^{-4}$  |
| LJP006 A549 24H-A443654-1.11     | 8/137   | $1.68 \times 10^{-5}$  | $2.51 \times 10^{-4}$  |
| LJP006 HS578T 24H-A443654-1.11   | 6/69    | $2.10 \times 10^{-5}$  | $3.04 \times 10^{-4}$  |
| LJP006 HCC515 24H-A443654-0.12   | 7/106   | $2.60 \times 10^{-5}$  | $3.68 \times 10^{-4}$  |
| LJP006 HCC515 24H-A443654-0.37   | 7/106   | $2.60 \times 10^{-5}$  | $3.67 \times 10^{-4}$  |
| LJP006 MDAMB231 24H-A443654-10   | 5/47    | $3.93 \times 10^{-5}$  | $5.16 \times 10^{-4}$  |
| LJP006 HS578T 3H-A443654-10      | 7/114   | $4.16 \times 10^{-5}$  | $5.44 \times 10^{-4}$  |

Table S15: (Continued)

|                                  |       |                       |                       |
|----------------------------------|-------|-----------------------|-----------------------|
| LJP006 A549 24H-A443654-0.37     | 8/157 | $4.48 \times 10^{-5}$ | $5.77 \times 10^{-4}$ |
| LJP006 MDAMB231 3H-A443654-1.11  | 6/80  | $4.88 \times 10^{-5}$ | $6.20 \times 10^{-4}$ |
| LJP006 A375 24H-A443654-0.12     | 7/120 | $5.77 \times 10^{-5}$ | $7.18 \times 10^{-4}$ |
| LJP006 SKBR3 3H-A443654-10       | 6/83  | $6.01 \times 10^{-5}$ | $7.42 \times 10^{-4}$ |
| LJP006 BT20 24H-A443654-0.37     | 7/124 | $7.11 \times 10^{-5}$ | $8.51 \times 10^{-4}$ |
| LJP006 HS578T 3H-A443654-3.33    | 7/128 | $8.69 \times 10^{-5}$ | $9.99 \times 10^{-4}$ |
| LJP006 MDAMB231 24H-A443654-0.37 | 6/89  | $8.89 \times 10^{-5}$ | $1.02 \times 10^{-3}$ |
| LJP006 SKBR3 24H-A443654-0.12    | 7/129 | $9.12 \times 10^{-5}$ | $1.04 \times 10^{-3}$ |
| LJP006 PC3 24H-A443654-10        | 6/90  | $9.46 \times 10^{-5}$ | $1.07 \times 10^{-3}$ |
| LJP006 BT20 3H-A443654-3.33      | 4/31  | $1.13 \times 10^{-4}$ | $1.24 \times 10^{-3}$ |
| LJP006 HT29 24H-A443654-1.11     | 7/134 | $1.16 \times 10^{-4}$ | $1.27 \times 10^{-3}$ |
| LJP006 HME1 24H-A443654-0.37     | 6/94  | $1.20 \times 10^{-4}$ | $1.31 \times 10^{-3}$ |
| LJP006 LNCAP 24H-A443654-0.37    | 7/135 | $1.21 \times 10^{-4}$ | $1.32 \times 10^{-3}$ |
| LJP006 SKBR3 3H-A443654-0.12     | 4/32  | $1.28 \times 10^{-4}$ | $1.39 \times 10^{-3}$ |
| LJP006 HME1 3H-A443654-10        | 5/60  | $1.29 \times 10^{-4}$ | $1.39 \times 10^{-3}$ |
| LJP006 A375 24H-A443654-3.33     | 4/35  | $1.83 \times 10^{-4}$ | $1.87 \times 10^{-3}$ |
| LJP006 MCF10A 3H-A443654-0.04    | 4/36  | $2.04 \times 10^{-4}$ | $2.05 \times 10^{-3}$ |
| LJP006 HS578T 3H-A443654-0.37    | 5/68  | $2.33 \times 10^{-4}$ | $2.30 \times 10^{-3}$ |
| LJP006 MCF7 24H-A443654-0.12     | 6/108 | $2.58 \times 10^{-4}$ | $2.51 \times 10^{-3}$ |
| LJP006 BT20 24H-A443654-0.12     | 6/110 | $2.85 \times 10^{-4}$ | $2.73 \times 10^{-3}$ |
| LJP006 MCF10A 3H-A443654-3.33    | 6/110 | $2.85 \times 10^{-4}$ | $2.73 \times 10^{-3}$ |
| LJP006 HT29 24H-A443654-10       | 5/71  | $2.85 \times 10^{-4}$ | $2.73 \times 10^{-3}$ |
| LJP006 MDAMB231 24H-A443654-3.33 | 5/71  | $2.85 \times 10^{-4}$ | $2.73 \times 10^{-3}$ |
| LJP006 HS578T 3H-A443654-1.11    | 6/113 | $3.29 \times 10^{-4}$ | $3.08 \times 10^{-3}$ |
| LJP006 MCF7 24H-A443654-10       | 4/43  | $4.10 \times 10^{-4}$ | $3.68 \times 10^{-3}$ |
| LJP006 HT29 24H-A443654-3.33     | 5/78  | $4.42 \times 10^{-4}$ | $3.93 \times 10^{-3}$ |
| LJP006 A375 24H-A443654-10       | 4/44  | $4.48 \times 10^{-4}$ | $3.98 \times 10^{-3}$ |
| LJP006 BT20 3H-A443654-10        | 4/45  | $4.88 \times 10^{-4}$ | $4.29 \times 10^{-3}$ |
| LJP006 MDAMB231 3H-A443654-3.33  | 6/123 | $5.18 \times 10^{-4}$ | $4.51 \times 10^{-3}$ |
| LJP006 SKBR3 3H-A443654-0.37     | 3/20  | $5.47 \times 10^{-4}$ | $4.71 \times 10^{-3}$ |
| LJP006 LNCAP 3H-A443654-10       | 5/82  | $5.56 \times 10^{-4}$ | $4.77 \times 10^{-3}$ |
| LJP006 MDAMB231 24H-A443654-0.04 | 4/48  | $6.26 \times 10^{-4}$ | $5.26 \times 10^{-3}$ |
| LJP006 MCF7 24H-A443654-1.11     | 4/49  | $6.77 \times 10^{-4}$ | $5.61 \times 10^{-3}$ |
| LJP006 LNCAP 3H-A443654-3.33     | 5/89  | $8.09 \times 10^{-4}$ | $6.54 \times 10^{-3}$ |
| LJP006 MCF7 24H-A443654-0.37     | 5/91  | $8.94 \times 10^{-4}$ | $7.14 \times 10^{-3}$ |
| LJP006 MCF7 3H-A443654-1.11      | 5/91  | $8.94 \times 10^{-4}$ | $7.13 \times 10^{-3}$ |
| LJP006 BT20 3H-A443654-0.37      | 3/25  | $1.07 \times 10^{-3}$ | $8.27 \times 10^{-3}$ |
| LJP006 BT20 3H-A443654-0.04      | 3/26  | $1.20 \times 10^{-3}$ | $9.09 \times 10^{-3}$ |
| LJP006 MCF10A 3H-A443654-0.37    | 4/62  | $1.64 \times 10^{-3}$ | $1.18 \times 10^{-2}$ |
| LJP006 MCF7 3H-A443654-3.33      | 4/66  | $2.07 \times 10^{-3}$ | $1.43 \times 10^{-2}$ |
| LJP006 MDAMB231 24H-A443654-0.12 | 4/70  | $2.57 \times 10^{-3}$ | $1.71 \times 10^{-2}$ |
| LJP006 HEPG2 24H-A443654-0.37    | 5/116 | $2.62 \times 10^{-3}$ | $1.74 \times 10^{-2}$ |
| LJP006 LNCAP 3H-A443654-0.37     | 3/34  | $2.64 \times 10^{-3}$ | $1.75 \times 10^{-2}$ |
| LJP006 HEPG2 24H-A443654-1.11    | 5/125 | $3.62 \times 10^{-3}$ | $2.27 \times 10^{-2}$ |
| LJP006 HS578T 3H-A443654-0.12    | 3/39  | $3.92 \times 10^{-3}$ | $2.41 \times 10^{-2}$ |
| LJP006 MCF7 24H-A443654-3.33     | 3/43  | $5.16 \times 10^{-3}$ | $2.99 \times 10^{-2}$ |
| LJP006 HME1 3H-A443654-0.04      | 3/48  | $7.03 \times 10^{-3}$ | $3.82 \times 10^{-2}$ |
| LJP006 LNCAP 24H-A443654-0.04    | 3/48  | $7.03 \times 10^{-3}$ | $3.82 \times 10^{-2}$ |
| LJP006 HT29 24H-A443654-0.37     | 3/50  | $7.87 \times 10^{-3}$ | $4.18 \times 10^{-2}$ |
| LJP006 LNCAP 3H-A443654-0.04     | 2/18  | $9.27 \times 10^{-3}$ | $4.75 \times 10^{-2}$ |

Table S16: CGP-60474 significantly affects the expression of the selected 163 genes due to ‘LINCS L1000 Chem Pert up’ category in Enrichr. The last number after the - is dose density.

| Term                             | Overlap | P-value               | Adjusted P-value      |
|----------------------------------|---------|-----------------------|-----------------------|
| LINCS L1000 Chem Pert up         |         |                       |                       |
| LJP008 HT29 24H-CGP-60474-0.04   | 10/117  | $4.13 \times 10^{-8}$ | $1.70 \times 10^{-6}$ |
| LJP005 MCF7 3H-CGP-60474-10      | 8/69    | $8.98 \times 10^{-8}$ | $3.29 \times 10^{-6}$ |
| LJP006 MCF7 3H-CGP-60474-0.12    | 7/61    | $6.33 \times 10^{-7}$ | $1.69 \times 10^{-5}$ |
| LJP008 PC3 24H-CGP-60474-0.04    | 10/161  | $8.27 \times 10^{-7}$ | $2.11 \times 10^{-5}$ |
| LJP008 MCF7 24H-CGP-60474-10     | 8/94    | $1.01 \times 10^{-6}$ | $2.48 \times 10^{-5}$ |
| LJP005 MCF10A 24H-CGP-60474-0.04 | 6/42    | $1.10 \times 10^{-6}$ | $2.67 \times 10^{-5}$ |
| LJP006 LNCAP 3H-CGP-60474-0.37   | 7/68    | $1.34 \times 10^{-6}$ | $3.14 \times 10^{-5}$ |
| LJP007 HCC515 24H-CGP-60474-0.04 | 9/138   | $1.99 \times 10^{-6}$ | $4.33 \times 10^{-5}$ |
| LJP005 SKBR3 24H-CGP-60474-0.12  | 8/106   | $2.51 \times 10^{-6}$ | $5.28 \times 10^{-5}$ |
| LJP007 HT29 24H-CGP-60474-0.12   | 9/146   | $3.17 \times 10^{-6}$ | $6.38 \times 10^{-5}$ |
| LJP005 SKBR3 24H-CGP-60474-0.37  | 8/115   | $4.63 \times 10^{-6}$ | $8.82 \times 10^{-5}$ |
| LJP009 PC3 24H-CGP-60474-0.04    | 10/198  | $5.34 \times 10^{-6}$ | $9.96 \times 10^{-5}$ |
| LJP006 HCC515 24H-CGP-60474-0.37 | 10/225  | $1.63 \times 10^{-5}$ | $2.49 \times 10^{-4}$ |
| LJP009 MCF7 24H-CGP-60474-0.12   | 8/137   | $1.68 \times 10^{-5}$ | $2.55 \times 10^{-4}$ |
| LJP006 MCF7 3H-CGP-60474-3.33    | 6/67    | $1.77 \times 10^{-5}$ | $2.66 \times 10^{-4}$ |
| LJP007 MCF7 24H-CGP-60474-0.04   | 8/144   | $2.41 \times 10^{-5}$ | $3.48 \times 10^{-4}$ |
| LJP007 PC3 24H-CGP-60474-10      | 7/122   | $6.41 \times 10^{-5}$ | $7.96 \times 10^{-4}$ |
| LJP008 A375 24H-CGP-60474-0.37   | 8/170   | $7.85 \times 10^{-5}$ | $9.36 \times 10^{-4}$ |
| LJP009 MCF7 24H-CGP-60474-10     | 7/126   | $7.87 \times 10^{-5}$ | $9.37 \times 10^{-4}$ |
| LJP005 A549 24H-CGP-60474-0.37   | 8/171   | $8.18 \times 10^{-5}$ | $9.72 \times 10^{-4}$ |
| LJP009 PC3 24H-CGP-60474-1.11    | 9/220   | $8.28 \times 10^{-5}$ | $9.82 \times 10^{-4}$ |
| LJP009 PC3 24H-CGP-60474-10      | 8/176   | $1.00 \times 10^{-4}$ | $1.15 \times 10^{-3}$ |
| LJP009 PC3 24H-CGP-60474-0.12    | 8/176   | $1.00 \times 10^{-4}$ | $1.15 \times 10^{-3}$ |
| LJP007 PC3 24H-CGP-60474-3.33    | 7/131   | $1.01 \times 10^{-4}$ | $1.16 \times 10^{-3}$ |
| LJP005 MCF7 3H-CGP-60474-3.33    | 5/58    | $1.09 \times 10^{-4}$ | $1.24 \times 10^{-3}$ |
| LJP005 PC3 24H-CGP-60474-1.11    | 8/183   | $1.31 \times 10^{-4}$ | $1.43 \times 10^{-3}$ |
| LJP009 HT29 24H-CGP-60474-1.11   | 6/99    | $1.60 \times 10^{-4}$ | $1.70 \times 10^{-3}$ |
| LJP006 A375 24H-CGP-60474-0.37   | 7/144   | $1.81 \times 10^{-4}$ | $1.88 \times 10^{-3}$ |
| LJP006 MCF10A 24H-CGP-60474-10   | 7/148   | $2.14 \times 10^{-4}$ | $2.16 \times 10^{-3}$ |
| LJP006 MCF7 3H-CGP-60474-10      | 5/67    | $2.17 \times 10^{-4}$ | $2.18 \times 10^{-3}$ |
| LJP006 A549 24H-CGP-60474-10     | 7/149   | $2.23 \times 10^{-4}$ | $2.23 \times 10^{-3}$ |
| LJP008 A549 24H-CGP-60474-0.37   | 6/106   | $2.33 \times 10^{-4}$ | $2.31 \times 10^{-3}$ |
| LJP005 MCF7 3H-CGP-60474-0.37    | 6/106   | $2.33 \times 10^{-4}$ | $2.31 \times 10^{-3}$ |
| LJP006 BT20 24H-CGP-60474-3.33   | 6/110   | $2.85 \times 10^{-4}$ | $2.74 \times 10^{-3}$ |
| LJP008 HCC515 24H-CGP-60474-3.33 | 7/157   | $3.08 \times 10^{-4}$ | $2.93 \times 10^{-3}$ |
| LJP009 A375 24H-CGP-60474-0.12   | 6/112   | $3.14 \times 10^{-4}$ | $2.97 \times 10^{-3}$ |
| LJP006 LNCAP 24H-CGP-60474-10    | 7/159   | $3.32 \times 10^{-4}$ | $3.13 \times 10^{-3}$ |
| LJP007 PC3 24H-CGP-60474-0.04    | 6/114   | $3.45 \times 10^{-4}$ | $3.21 \times 10^{-3}$ |
| LJP005 HCC515 24H-CGP-60474-0.12 | 5/75    | $3.68 \times 10^{-4}$ | $3.41 \times 10^{-3}$ |
| LJP007 MCF7 24H-CGP-60474-10     | 6/117   | $3.97 \times 10^{-4}$ | $3.62 \times 10^{-3}$ |
| LJP006 SKBR3 3H-CGP-60474-0.37   | 4/43    | $4.10 \times 10^{-4}$ | $3.71 \times 10^{-3}$ |
| LJP009 MCF7 24H-CGP-60474-0.04   | 6/119   | $4.34 \times 10^{-4}$ | $3.91 \times 10^{-3}$ |
| LJP008 HT29 24H-CGP-60474-1.11   | 5/78    | $4.42 \times 10^{-4}$ | $3.97 \times 10^{-3}$ |
| LJP006 SKBR3 24H-CGP-60474-3.33  | 6/120   | $4.54 \times 10^{-4}$ | $4.05 \times 10^{-3}$ |
| LJP008 MCF7 24H-CGP-60474-1.11   | 6/121   | $4.75 \times 10^{-4}$ | $4.21 \times 10^{-3}$ |
| LJP008 HEPG2 24H-CGP-60474-0.37  | 6/122   | $4.96 \times 10^{-4}$ | $4.36 \times 10^{-3}$ |
| LJP005 PC3 24H-CGP-60474-0.37    | 7/171   | $5.14 \times 10^{-4}$ | $4.51 \times 10^{-3}$ |
| LJP007 HCC515 24H-CGP-60474-0.12 | 7/179   | $6.75 \times 10^{-4}$ | $5.67 \times 10^{-3}$ |
| LJP007 PC3 24H-CGP-60474-0.12    | 5/87    | $7.29 \times 10^{-4}$ | $6.05 \times 10^{-3}$ |
| LJP009 HCC515 24H-CGP-60474-0.12 | 5/90    | $8.51 \times 10^{-4}$ | $6.83 \times 10^{-3}$ |
| LJP008 MCF7 24H-CGP-60474-0.37   | 5/91    | $8.94 \times 10^{-4}$ | $7.15 \times 10^{-3}$ |
| LJP006 PC3 24H-CGP-60474-1.11    | 6/137   | $9.12 \times 10^{-4}$ | $7.28 \times 10^{-3}$ |
| LJP005 HS578T 3H-CGP-60474-0.04  | 4/53    | $9.12 \times 10^{-4}$ | $7.26 \times 10^{-3}$ |
| LJP005 MCF10A 3H-CGP-60474-0.04  | 4/53    | $9.12 \times 10^{-4}$ | $7.25 \times 10^{-3}$ |

Table S16: (Continued)

|                                   |       |                       |                       |
|-----------------------------------|-------|-----------------------|-----------------------|
| LJP006 LNCAP 3H-CGP-60474-1.11    | 4/53  | $9.12 \times 10^{-4}$ | $7.24 \times 10^{-3}$ |
| LJP006 MCF10A 24H-CGP-60474-1.11  | 6/138 | $9.47 \times 10^{-4}$ | $7.50 \times 10^{-3}$ |
| LJP008 HT29 24H-CGP-60474-0.12    | 4/55  | $1.05 \times 10^{-3}$ | $8.15 \times 10^{-3}$ |
| LJP006 HCC515 24H-CGP-60474-1.11  | 7/194 | $1.08 \times 10^{-3}$ | $8.34 \times 10^{-3}$ |
| LJP005 HCC515 24H-CGP-60474-1.11  | 6/142 | $1.10 \times 10^{-3}$ | $8.44 \times 10^{-3}$ |
| LJP007 MCF7 24H-CGP-60474-0.37    | 6/142 | $1.10 \times 10^{-3}$ | $8.43 \times 10^{-3}$ |
| LJP006 HME1 3H-CGP-60474-1.11     | 4/57  | $1.20 \times 10^{-3}$ | $9.08 \times 10^{-3}$ |
| LJP007 MCF7 24H-CGP-60474-1.11    | 6/145 | $1.22 \times 10^{-3}$ | $9.19 \times 10^{-3}$ |
| LJP007 HT29 24H-CGP-60474-0.37    | 6/147 | $1.31 \times 10^{-3}$ | $9.74 \times 10^{-3}$ |
| LJP006 SKBR3 24H-CGP-60474-1.11   | 5/100 | $1.37 \times 10^{-3}$ | $1.01 \times 10^{-2}$ |
| LJP005 MCF7 3H-CGP-60474-0.12     | 4/60  | $1.45 \times 10^{-3}$ | $1.06 \times 10^{-2}$ |
| LJP006 A375 24H-CGP-60474-1.11    | 6/156 | $1.78 \times 10^{-3}$ | $1.25 \times 10^{-2}$ |
| LJP006 MCF10A 24H-CGP-60474-3.33  | 6/161 | $2.08 \times 10^{-3}$ | $1.42 \times 10^{-2}$ |
| LJP005 HS578T 3H-CGP-60474-10     | 4/67  | $2.19 \times 10^{-3}$ | $1.48 \times 10^{-2}$ |
| LJP006 PC3 24H-CGP-60474-0.37     | 7/221 | $2.27 \times 10^{-3}$ | $1.53 \times 10^{-2}$ |
| LJP006 MDAMB231 3H-CGP-60474-0.37 | 4/68  | $2.31 \times 10^{-3}$ | $1.55 \times 10^{-2}$ |
| LJP008 MCF7 24H-CGP-60474-0.12    | 5/115 | $2.52 \times 10^{-3}$ | $1.67 \times 10^{-2}$ |
| LJP006 A375 24H-CGP-60474-10      | 5/118 | $2.82 \times 10^{-3}$ | $1.84 \times 10^{-2}$ |
| LJP007 MCF7 24H-CGP-60474-0.12    | 5/119 | $2.93 \times 10^{-3}$ | $1.88 \times 10^{-2}$ |
| LJP008 PC3 24H-CGP-60474-10       | 5/120 | $3.04 \times 10^{-3}$ | $1.94 \times 10^{-2}$ |
| LJP005 A375 24H-CGP-60474-3.33    | 6/174 | $3.07 \times 10^{-3}$ | $1.96 \times 10^{-2}$ |
| LJP006 SKBR3 3H-CGP-60474-1.11    | 3/36  | $3.11 \times 10^{-3}$ | $1.98 \times 10^{-2}$ |
| LJP006 HS578T 3H-CGP-60474-3.33   | 4/74  | $3.14 \times 10^{-3}$ | $1.99 \times 10^{-2}$ |
| LJP008 A375 24H-CGP-60474-0.12    | 6/175 | $3.16 \times 10^{-3}$ | $2.00 \times 10^{-2}$ |
| LJP008 PC3 24H-CGP-60474-3.33     | 6/177 | $3.34 \times 10^{-3}$ | $2.10 \times 10^{-2}$ |
| LJP005 HS578T 24H-CGP-60474-0.37  | 5/124 | $3.49 \times 10^{-3}$ | $2.17 \times 10^{-2}$ |
| LJP008 A375 24H-CGP-60474-10      | 6/179 | $3.53 \times 10^{-3}$ | $2.19 \times 10^{-2}$ |
| LJP005 MCF7 3H-CGP-60474-1.11     | 4/78  | $3.80 \times 10^{-3}$ | $2.32 \times 10^{-2}$ |
| LJP006 A549 24H-CGP-60474-1.11    | 5/129 | $4.14 \times 10^{-3}$ | $2.48 \times 10^{-2}$ |
| LJP006 BT20 24H-CGP-60474-0.12    | 5/129 | $4.14 \times 10^{-3}$ | $2.48 \times 10^{-2}$ |
| LJP006 HME1 3H-CGP-60474-0.12     | 4/80  | $4.16 \times 10^{-3}$ | $2.49 \times 10^{-2}$ |
| LJP005 MDAMB231 3H-CGP-60474-10   | 3/40  | $4.21 \times 10^{-3}$ | $2.51 \times 10^{-2}$ |
| LJP006 MCF10A 3H-CGP-60474-1.11   | 3/40  | $4.21 \times 10^{-3}$ | $2.50 \times 10^{-2}$ |
| LJP009 MCF7 24H-CGP-60474-3.33    | 5/131 | $4.41 \times 10^{-3}$ | $2.61 \times 10^{-2}$ |
| LJP008 PC3 24H-CGP-60474-0.12     | 5/133 | $4.71 \times 10^{-3}$ | $2.74 \times 10^{-2}$ |
| LJP005 PC3 24H-CGP-60474-3.33     | 5/134 | $4.86 \times 10^{-3}$ | $2.80 \times 10^{-2}$ |
| LJP006 SKBR3 24H-CGP-60474-0.04   | 5/134 | $4.86 \times 10^{-3}$ | $2.80 \times 10^{-2}$ |
| LJP006 HS578T 3H-CGP-60474-0.04   | 3/44  | $5.51 \times 10^{-3}$ | $3.09 \times 10^{-2}$ |
| LJP009 PC3 24H-CGP-60474-0.37     | 6/200 | $6.03 \times 10^{-3}$ | $3.31 \times 10^{-2}$ |
| LJP006 HME1 24H-CGP-60474-0.12    | 5/142 | $6.19 \times 10^{-3}$ | $3.39 \times 10^{-2}$ |
| LJP005 HT29 24H-CGP-60474-1.11    | 5/143 | $6.37 \times 10^{-3}$ | $3.46 \times 10^{-2}$ |
| LJP008 A549 24H-CGP-60474-0.04    | 4/91  | $6.56 \times 10^{-3}$ | $3.55 \times 10^{-2}$ |
| LJP009 HCC515 24H-CGP-60474-0.04  | 4/93  | $7.08 \times 10^{-3}$ | $3.76 \times 10^{-2}$ |
| LJP005 BT20 24H-CGP-60474-0.12    | 3/49  | $7.44 \times 10^{-3}$ | $3.93 \times 10^{-2}$ |
| LJP008 A375 24H-CGP-60474-1.11    | 5/151 | $7.98 \times 10^{-3}$ | $4.12 \times 10^{-2}$ |
| LJP006 HS578T 24H-CGP-60474-1.11  | 5/151 | $7.98 \times 10^{-3}$ | $4.12 \times 10^{-2}$ |
| LJP008 A375 24H-CGP-60474-3.33    | 5/152 | $8.19 \times 10^{-3}$ | $4.22 \times 10^{-2}$ |
| LJP005 A549 24H-CGP-60474-0.04    | 2/17  | $8.29 \times 10^{-3}$ | $4.26 \times 10^{-2}$ |
| LJP007 A549 24H-CGP-60474-0.04    | 3/51  | $8.31 \times 10^{-3}$ | $4.25 \times 10^{-2}$ |
| LJP008 A549 24H-CGP-60474-10      | 5/153 | $8.42 \times 10^{-3}$ | $4.30 \times 10^{-2}$ |
| LJP009 PC3 24H-CGP-60474-3.33     | 6/217 | $8.84 \times 10^{-3}$ | $4.46 \times 10^{-2}$ |
| LJP009 HT29 24H-CGP-60474-0.04    | 4/100 | $9.10 \times 10^{-3}$ | $4.58 \times 10^{-2}$ |
| LJP007 HT29 24H-CGP-60474-10      | 5/156 | $9.11 \times 10^{-3}$ | $4.58 \times 10^{-2}$ |
| LJP008 PC3 24H-CGP-60474-1.11     | 5/157 | $9.35 \times 10^{-3}$ | $4.66 \times 10^{-2}$ |
| LJP006 HCC515 24H-CGP-60474-10    | 6/221 | $9.62 \times 10^{-3}$ | $4.78 \times 10^{-2}$ |
| LJP009 MCF7 24H-CGP-60474-1.11    | 5/159 | $9.84 \times 10^{-3}$ | $4.86 \times 10^{-2}$ |
| LJP008 PC3 24H-CGP-60474-0.37     | 5/160 | $1.01 \times 10^{-2}$ | $4.96 \times 10^{-2}$ |

Table S17: CGP-60474 significantly affects the expression of the selected 163 genes as evident in the ‘LINCS L1000 Chem Pert down’ category in Enrichr. The last number after the - is dose density.

| Term                             | Overlap | P-value                | Adjusted P-value       |
|----------------------------------|---------|------------------------|------------------------|
| LINCS L1000 Chem Pert down       |         |                        |                        |
| LJP006 SKBR3 24H-CGP-60474-1.11  | 18/106  | $5.03 \times 10^{-19}$ | $3.33 \times 10^{-15}$ |
| LJP006 SKBR3 24H-CGP-60474-10    | 18/118  | $3.76 \times 10^{-18}$ | $1.56 \times 10^{-14}$ |
| LJP007 A549 24H-CGP-60474-0.37   | 12/30   | $4.34 \times 10^{-18}$ | $1.60 \times 10^{-14}$ |
| LJP005 HS578T 24H-CGP-60474-3.33 | 17/131  | $5.56 \times 10^{-16}$ | $5.94 \times 10^{-13}$ |
| LJP006 SKBR3 24H-CGP-60474-0.04  | 16/113  | $1.01 \times 10^{-15}$ | $9.51 \times 10^{-13}$ |
| LJP006 SKBR3 24H-CGP-60474-0.37  | 15/104  | $6.17 \times 10^{-15}$ | $4.44 \times 10^{-12}$ |
| LJP009 A549 24H-CGP-60474-0.04   | 13/67   | $7.47 \times 10^{-15}$ | $4.95 \times 10^{-12}$ |
| LJP006 SKBR3 24H-CGP-60474-3.33  | 15/130  | $1.82 \times 10^{-13}$ | $6.42 \times 10^{-11}$ |
| LJP006 MCF10A 24H-CGP-60474-0.12 | 13/88   | $3.05 \times 10^{-13}$ | $9.91 \times 10^{-11}$ |
| LJP006 HME1 3H-CGP-60474-1.11    | 16/165  | $4.30 \times 10^{-13}$ | $1.31 \times 10^{-10}$ |
| LJP005 BT20 24H-CGP-60474-10     | 13/93   | $6.37 \times 10^{-13}$ | $1.80 \times 10^{-10}$ |
| LJP008 HCC515 24H-CGP-60474-0.12 | 13/101  | $1.89 \times 10^{-12}$ | $4.30 \times 10^{-10}$ |
| LJP007 HCC515 24H-CGP-60474-10   | 12/95   | $1.74 \times 10^{-11}$ | $2.46 \times 10^{-9}$  |
| LJP006 MCF10A 3H-CGP-60474-0.37  | 13/127  | $3.68 \times 10^{-11}$ | $4.67 \times 10^{-9}$  |
| LJP006 MCF10A 24H-CGP-60474-3.33 | 12/102  | $4.09 \times 10^{-11}$ | $5.12 \times 10^{-9}$  |
| LJP006 BT20 24H-CGP-60474-10     | 13/134  | $7.29 \times 10^{-11}$ | $8.16 \times 10^{-9}$  |
| LJP009 A549 24H-CGP-60474-0.12   | 10/63   | $8.63 \times 10^{-11}$ | $9.25 \times 10^{-9}$  |
| LJP006 HEPG2 24H-CGP-60474-10    | 12/109  | $9.04 \times 10^{-11}$ | $9.54 \times 10^{-9}$  |
| LJP006 BT20 24H-CGP-60474-1.11   | 10/65   | $1.19 \times 10^{-10}$ | $1.21 \times 10^{-8}$  |
| LJP005 BT20 24H-CGP-60474-3.33   | 10/66   | $1.40 \times 10^{-10}$ | $1.38 \times 10^{-8}$  |
| LJP005 HS578T 24H-CGP-60474-10   | 12/114  | $1.54 \times 10^{-10}$ | $1.50 \times 10^{-8}$  |
| LJP005 SKBR3 24H-CGP-60474-3.33  | 12/114  | $1.54 \times 10^{-10}$ | $1.49 \times 10^{-8}$  |
| LJP008 A549 24H-CGP-60474-0.12   | 10/67   | $1.63 \times 10^{-10}$ | $1.56 \times 10^{-8}$  |
| LJP005 A549 24H-CGP-60474-0.12   | 15/211  | $2.06 \times 10^{-10}$ | $1.90 \times 10^{-8}$  |
| LJP008 HEPG2 24H-CGP-60474-10    | 12/121  | $3.11 \times 10^{-10}$ | $2.69 \times 10^{-8}$  |
| LJP006 SKBR3 24H-CGP-60474-0.12  | 11/103  | $7.84 \times 10^{-10}$ | $5.76 \times 10^{-8}$  |
| LJP006 A549 24H-CGP-60474-1.11   | 9/57    | $8.18 \times 10^{-10}$ | $5.94 \times 10^{-8}$  |
| LJP007 HT29 24H-CGP-60474-0.37   | 11/105  | $9.66 \times 10^{-10}$ | $6.82 \times 10^{-8}$  |
| LJP008 HEPG2 24H-CGP-60474-0.12  | 12/134  | $1.02 \times 10^{-9}$  | $7.13 \times 10^{-8}$  |
| LJP009 HT29 24H-CGP-60474-0.37   | 9/59    | $1.13 \times 10^{-9}$  | $7.77 \times 10^{-8}$  |
| LJP007 A549 24H-CGP-60474-1.11   | 8/41    | $1.25 \times 10^{-9}$  | $8.45 \times 10^{-8}$  |
| LJP005 A549 24H-CGP-60474-0.37   | 10/82   | $1.27 \times 10^{-9}$  | $8.54 \times 10^{-8}$  |
| LJP009 A549 24H-CGP-60474-10     | 9/61    | $1.53 \times 10^{-9}$  | $9.96 \times 10^{-8}$  |
| LJP005 BT20 24H-CGP-60474-0.12   | 10/84   | $1.61 \times 10^{-9}$  | $1.03 \times 10^{-7}$  |
| LJP006 LNCAP 24H-CGP-60474-0.04  | 12/140  | $1.69 \times 10^{-9}$  | $1.07 \times 10^{-7}$  |
| LJP006 MCF10A 24H-CGP-60474-10   | 10/86   | $2.04 \times 10^{-9}$  | $1.26 \times 10^{-7}$  |
| LJP006 SKBR3 3H-CGP-60474-1.11   | 10/87   | $2.29 \times 10^{-9}$  | $1.40 \times 10^{-7}$  |
| LJP005 SKBR3 3H-CGP-60474-1.11   | 10/89   | $2.86 \times 10^{-9}$  | $1.68 \times 10^{-7}$  |
| LJP005 SKBR3 24H-CGP-60474-0.37  | 10/91   | $3.57 \times 10^{-9}$  | $2.03 \times 10^{-7}$  |
| LJP006 MCF10A 24H-CGP-60474-1.11 | 10/91   | $3.57 \times 10^{-9}$  | $2.02 \times 10^{-7}$  |
| LJP007 HEPG2 24H-CGP-60474-1.11  | 10/91   | $3.57 \times 10^{-9}$  | $2.02 \times 10^{-7}$  |
| LJP007 HT29 24H-CGP-60474-1.11   | 10/91   | $3.57 \times 10^{-9}$  | $2.02 \times 10^{-7}$  |
| LJP006 HS578T 3H-CGP-60474-10    | 12/150  | $3.73 \times 10^{-9}$  | $2.09 \times 10^{-7}$  |
| LJP006 BT20 24H-CGP-60474-3.33   | 10/93   | $4.43 \times 10^{-9}$  | $2.43 \times 10^{-7}$  |
| LJP007 A549 24H-CGP-60474-0.12   | 7/32    | $5.95 \times 10^{-9}$  | $3.13 \times 10^{-7}$  |
| LJP005 HCC515 24H-CGP-60474-1.11 | 8/52    | $9.09 \times 10^{-9}$  | $4.45 \times 10^{-7}$  |
| LJP009 A549 24H-CGP-60474-1.11   | 9/76    | $1.13 \times 10^{-8}$  | $5.40 \times 10^{-7}$  |
| LJP005 MCF10A 24H-CGP-60474-1.11 | 10/103  | $1.21 \times 10^{-8}$  | $5.67 \times 10^{-7}$  |
| LJP006 HME1 3H-CGP-60474-0.04    | 12/167  | $1.26 \times 10^{-8}$  | $5.86 \times 10^{-7}$  |
| LJP006 SKBR3 3H-CGP-60474-0.12   | 9/77    | $1.28 \times 10^{-8}$  | $5.91 \times 10^{-7}$  |
| LJP008 HEPG2 24H-CGP-60474-0.04  | 11/134  | $1.30 \times 10^{-8}$  | $6.00 \times 10^{-7}$  |
| LJP005 MCF7 24H-CGP-60474-3.33   | 10/104  | $1.32 \times 10^{-8}$  | $6.07 \times 10^{-7}$  |
| LJP006 HEPG2 24H-CGP-60474-1.11  | 10/104  | $1.32 \times 10^{-8}$  | $6.03 \times 10^{-7}$  |
| LJP009 HCC515 24H-CGP-60474-0.04 | 10/108  | $1.91 \times 10^{-8}$  | $8.22 \times 10^{-7}$  |

Table S17: (Continued)

|                                   |        |                       |                       |
|-----------------------------------|--------|-----------------------|-----------------------|
| LJP005 HT29 24H-CGP-60474-3.33    | 10/108 | $1.91 \times 10^{-8}$ | $8.20 \times 10^{-7}$ |
| LJP007 HEPG2 24H-CGP-60474-10     | 9/81   | $2.01 \times 10^{-8}$ | $8.49 \times 10^{-7}$ |
| LJP006 SKBR3 3H-CGP-60474-3.33    | 9/82   | $2.24 \times 10^{-8}$ | $9.28 \times 10^{-7}$ |
| LJP009 HT29 24H-CGP-60474-3.33    | 8/61   | $3.34 \times 10^{-8}$ | $1.32 \times 10^{-6}$ |
| LJP006 HS578T 3H-CGP-60474-0.37   | 10/117 | $4.13 \times 10^{-8}$ | $1.59 \times 10^{-6}$ |
| LJP006 MCF10A 3H-CGP-60474-10     | 11/151 | $4.51 \times 10^{-8}$ | $1.71 \times 10^{-6}$ |
| LJP005 MCF7 24H-CGP-60474-0.12    | 9/89   | $4.63 \times 10^{-8}$ | $1.75 \times 10^{-6}$ |
| LJP009 A549 24H-CGP-60474-3.33    | 9/90   | $5.11 \times 10^{-8}$ | $1.92 \times 10^{-6}$ |
| LJP007 HEPG2 24H-CGP-60474-0.37   | 9/90   | $5.11 \times 10^{-8}$ | $1.90 \times 10^{-6}$ |
| LJP005 HS578T 24H-CGP-60474-0.12  | 9/91   | $5.63 \times 10^{-8}$ | $2.07 \times 10^{-6}$ |
| LJP008 PC3 24H-CGP-60474-10       | 10/121 | $5.70 \times 10^{-8}$ | $2.09 \times 10^{-6}$ |
| LJP006 HME1 3H-CGP-60474-10       | 10/121 | $5.70 \times 10^{-8}$ | $2.08 \times 10^{-6}$ |
| LJP005 HS578T 3H-CGP-60474-0.37   | 11/155 | $5.91 \times 10^{-8}$ | $2.16 \times 10^{-6}$ |
| LJP005 BT20 3H-CGP-60474-1.11     | 7/45   | $7.34 \times 10^{-8}$ | $2.58 \times 10^{-6}$ |
| LJP006 MCF10A 24H-CGP-60474-0.37  | 9/95   | $8.20 \times 10^{-8}$ | $2.83 \times 10^{-6}$ |
| LJP005 A549 24H-CGP-60474-1.11    | 9/96   | $8.99 \times 10^{-8}$ | $3.05 \times 10^{-6}$ |
| LJP008 PC3 24H-CGP-60474-1.11     | 10/128 | $9.74 \times 10^{-8}$ | $3.28 \times 10^{-6}$ |
| LJP008 HCC515 24H-CGP-60474-10    | 9/97   | $9.84 \times 10^{-8}$ | $3.32 \times 10^{-6}$ |
| LJP005 MCF7 24H-CGP-60474-0.37    | 9/97   | $9.84 \times 10^{-8}$ | $3.31 \times 10^{-6}$ |
| LJP005 HA1E 24H-CGP-60474-10      | 8/72   | $1.26 \times 10^{-7}$ | $4.09 \times 10^{-6}$ |
| LJP006 BT20 24H-CGP-60474-0.37    | 8/73   | $1.40 \times 10^{-7}$ | $4.46 \times 10^{-6}$ |
| LJP006 BT20 24H-CGP-60474-0.04    | 9/104  | $1.80 \times 10^{-7}$ | $5.54 \times 10^{-6}$ |
| LJP005 HT29 24H-CGP-60474-0.37    | 8/76   | $1.93 \times 10^{-7}$ | $5.91 \times 10^{-6}$ |
| LJP008 HEPG2 24H-CGP-60474-3.33   | 9/105  | $1.96 \times 10^{-7}$ | $5.96 \times 10^{-6}$ |
| LJP006 HS578T 24H-CGP-60474-0.37  | 9/106  | $2.12 \times 10^{-7}$ | $6.36 \times 10^{-6}$ |
| LJP007 HT29 24H-CGP-60474-10      | 9/106  | $2.12 \times 10^{-7}$ | $6.36 \times 10^{-6}$ |
| LJP008 MCF7 24H-CGP-60474-0.12    | 9/109  | $2.70 \times 10^{-7}$ | $7.74 \times 10^{-6}$ |
| LJP005 MCF10A 3H-CGP-60474-10     | 9/109  | $2.70 \times 10^{-7}$ | $7.73 \times 10^{-6}$ |
| LJP006 MCF10A 3H-CGP-60474-0.04   | 10/143 | $2.76 \times 10^{-7}$ | $7.86 \times 10^{-6}$ |
| LJP007 HT29 24H-CGP-60474-0.04    | 8/80   | $2.89 \times 10^{-7}$ | $8.16 \times 10^{-6}$ |
| LJP007 A549 24H-CGP-60474-0.04    | 6/34   | $2.97 \times 10^{-7}$ | $8.35 \times 10^{-6}$ |
| LJP006 LNCAP 3H-CGP-60474-0.12    | 11/186 | $3.76 \times 10^{-7}$ | $1.02 \times 10^{-5}$ |
| LJP006 HCC515 24H-CGP-60474-10    | 9/115  | $4.27 \times 10^{-7}$ | $1.13 \times 10^{-5}$ |
| LJP005 MCF10A 3H-CGP-60474-1.11   | 9/116  | $4.60 \times 10^{-7}$ | $1.20 \times 10^{-5}$ |
| LJP008 A549 24H-CGP-60474-1.11    | 8/85   | $4.63 \times 10^{-7}$ | $1.21 \times 10^{-5}$ |
| LJP008 HEPG2 24H-CGP-60474-1.11   | 8/85   | $4.63 \times 10^{-7}$ | $1.21 \times 10^{-5}$ |
| LJP008 HCC515 24H-CGP-60474-1.11  | 8/85   | $4.63 \times 10^{-7}$ | $1.20 \times 10^{-5}$ |
| LJP006 HME1 3H-CGP-60474-0.12     | 11/192 | $5.16 \times 10^{-7}$ | $1.31 \times 10^{-5}$ |
| LJP008 HCC515 24H-CGP-60474-3.33  | 9/118  | $5.32 \times 10^{-7}$ | $1.35 \times 10^{-5}$ |
| LJP005 HA1E 24H-CGP-60474-1.11    | 8/87   | $5.54 \times 10^{-7}$ | $1.40 \times 10^{-5}$ |
| LJP005 MDAMB231 3H-CGP-60474-1.11 | 8/87   | $5.54 \times 10^{-7}$ | $1.39 \times 10^{-5}$ |
| LJP006 BT20 24H-CGP-60474-0.12    | 9/121  | $6.59 \times 10^{-7}$ | $1.62 \times 10^{-5}$ |
| LJP009 HCC515 24H-CGP-60474-3.33  | 8/89   | $6.61 \times 10^{-7}$ | $1.62 \times 10^{-5}$ |
| LJP008 PC3 24H-CGP-60474-0.37     | 9/122  | $7.06 \times 10^{-7}$ | $1.72 \times 10^{-5}$ |
| LJP006 MCF7 24H-CGP-60474-0.04    | 7/62   | $7.08 \times 10^{-7}$ | $1.71 \times 10^{-5}$ |
| LJP008 HA1E 24H-CGP-60474-0.37    | 8/90   | $7.20 \times 10^{-7}$ | $1.74 \times 10^{-5}$ |
| LJP006 MDAMB231 24H-CGP-60474-10  | 8/90   | $7.20 \times 10^{-7}$ | $1.73 \times 10^{-5}$ |
| LJP005 BT20 3H-CGP-60474-3.33     | 8/91   | $7.84 \times 10^{-7}$ | $1.88 \times 10^{-5}$ |
| LJP006 HME1 24H-CGP-60474-10      | 8/91   | $7.84 \times 10^{-7}$ | $1.88 \times 10^{-5}$ |
| LJP006 SKBR3 3H-CGP-60474-0.37    | 8/91   | $7.84 \times 10^{-7}$ | $1.88 \times 10^{-5}$ |
| LJP008 A375 24H-CGP-60474-1.11    | 8/92   | $8.53 \times 10^{-7}$ | $2.02 \times 10^{-5}$ |
| LJP009 HCC515 24H-CGP-60474-0.12  | 8/93   | $9.27 \times 10^{-7}$ | $2.18 \times 10^{-5}$ |
| LJP007 A375 24H-CGP-60474-3.33    | 8/93   | $9.27 \times 10^{-7}$ | $2.17 \times 10^{-5}$ |
| LJP006 HT29 24H-CGP-60474-10      | 8/94   | $1.01 \times 10^{-6}$ | $2.32 \times 10^{-5}$ |
| LJP005 MCF7 24H-CGP-60474-1.11    | 8/96   | $1.18 \times 10^{-6}$ | $2.67 \times 10^{-5}$ |
| LJP006 LNCAP 3H-CGP-60474-1.11    | 8/97   | $1.28 \times 10^{-6}$ | $2.85 \times 10^{-5}$ |
| LJP006 HA1E 24H-CGP-60474-3.33    | 7/68   | $1.34 \times 10^{-6}$ | $2.95 \times 10^{-5}$ |

Table S17: (Continued)

|                                    |        |                       |                       |
|------------------------------------|--------|-----------------------|-----------------------|
| LJP006 MDAMB231 3H-CGP-60474-3.33  | 9/132  | $1.37 \times 10^{-6}$ | $3.01 \times 10^{-5}$ |
| LJP007 MCF7 24H-CGP-60474-0.12     | 9/133  | $1.46 \times 10^{-6}$ | $3.19 \times 10^{-5}$ |
| LJP005 HS578T 3H-CGP-60474-3.33    | 10/173 | $1.59 \times 10^{-6}$ | $3.43 \times 10^{-5}$ |
| LJP007 HA1E 24H-CGP-60474-10       | 8/101  | $1.74 \times 10^{-6}$ | $3.68 \times 10^{-5}$ |
| LJP009 A375 24H-CGP-60474-0.04     | 8/102  | $1.88 \times 10^{-6}$ | $3.92 \times 10^{-5}$ |
| LJP006 HME1 24H-CGP-60474-1.11     | 7/72   | $1.98 \times 10^{-6}$ | $4.09 \times 10^{-5}$ |
| LJP008 A375 24H-CGP-60474-0.04     | 9/138  | $1.99 \times 10^{-6}$ | $4.09 \times 10^{-5}$ |
| LJP005 PC3 24H-CGP-60474-0.12      | 8/103  | $2.02 \times 10^{-6}$ | $4.16 \times 10^{-5}$ |
| LJP007 A375 24H-CGP-60474-0.04     | 8/105  | $2.34 \times 10^{-6}$ | $4.72 \times 10^{-5}$ |
| LJP005 HA1E 24H-CGP-60474-3.33     | 7/74   | $2.39 \times 10^{-6}$ | $4.79 \times 10^{-5}$ |
| LJP005 HT29 24H-CGP-60474-1.11     | 8/106  | $2.51 \times 10^{-6}$ | $4.99 \times 10^{-5}$ |
| LJP006 HCC515 24H-CGP-60474-0.37   | 8/106  | $2.51 \times 10^{-6}$ | $4.99 \times 10^{-5}$ |
| LJP005 MCF7 3H-CGP-60474-10        | 8/107  | $2.69 \times 10^{-6}$ | $5.30 \times 10^{-5}$ |
| LJP008 HA1E 24H-CGP-60474-3.33     | 7/76   | $2.86 \times 10^{-6}$ | $5.57 \times 10^{-5}$ |
| LJP009 A549 24H-CGP-60474-0.37     | 7/76   | $2.86 \times 10^{-6}$ | $5.57 \times 10^{-5}$ |
| LJP005 HCC515 24H-CGP-60474-0.37   | 8/108  | $2.89 \times 10^{-6}$ | $5.60 \times 10^{-5}$ |
| LJP005 MCF10A 24H-CGP-60474-0.12   | 7/77   | $3.13 \times 10^{-6}$ | $6.01 \times 10^{-5}$ |
| LJP008 A549 24H-CGP-60474-10       | 8/110  | $3.32 \times 10^{-6}$ | $6.33 \times 10^{-5}$ |
| LJP005 SKBR3 3H-CGP-60474-10       | 7/78   | $3.41 \times 10^{-6}$ | $6.48 \times 10^{-5}$ |
| LJP006 HS578T 24H-CGP-60474-10     | 7/78   | $3.41 \times 10^{-6}$ | $6.46 \times 10^{-5}$ |
| LJP006 MCF7 24H-CGP-60474-3.33     | 5/29   | $3.43 \times 10^{-6}$ | $6.46 \times 10^{-5}$ |
| LJP007 MCF7 24H-CGP-60474-0.04     | 10/189 | $3.53 \times 10^{-6}$ | $6.65 \times 10^{-5}$ |
| LJP005 MCF7 3H-CGP-60474-1.11      | 8/111  | $3.55 \times 10^{-6}$ | $6.68 \times 10^{-5}$ |
| LJP006 LNCAP 24H-CGP-60474-3.33    | 8/111  | $3.55 \times 10^{-6}$ | $6.67 \times 10^{-5}$ |
| LJP006 HS578T 24H-CGP-60474-0.04   | 7/79   | $3.72 \times 10^{-6}$ | $6.95 \times 10^{-5}$ |
| LJP009 HEPG2 24H-CGP-60474-1.11    | 8/112  | $3.80 \times 10^{-6}$ | $7.08 \times 10^{-5}$ |
| LJP008 A549 24H-CGP-60474-0.37     | 7/80   | $4.05 \times 10^{-6}$ | $7.50 \times 10^{-5}$ |
| LJP006 MCF10A 3H-CGP-60474-0.12    | 9/151  | $4.18 \times 10^{-6}$ | $7.69 \times 10^{-5}$ |
| LJP006 HS578T 3H-CGP-60474-0.04    | 8/115  | $4.63 \times 10^{-6}$ | $8.43 \times 10^{-5}$ |
| LJP006 MCF10A 3H-CGP-60474-1.11    | 8/115  | $4.63 \times 10^{-6}$ | $8.42 \times 10^{-5}$ |
| LJP005 A549 24H-CGP-60474-3.33     | 8/116  | $4.94 \times 10^{-6}$ | $8.93 \times 10^{-5}$ |
| LJP006 HS578T 24H-CGP-60474-0.12   | 7/83   | $5.18 \times 10^{-6}$ | $9.27 \times 10^{-5}$ |
| LJP009 HEPG2 24H-CGP-60474-0.12    | 8/117  | $5.26 \times 10^{-6}$ | $9.39 \times 10^{-5}$ |
| LJP005 HA1E 24H-CGP-60474-0.04     | 8/118  | $5.61 \times 10^{-6}$ | $9.93 \times 10^{-5}$ |
| LJP008 PC3 24H-CGP-60474-0.12      | 8/118  | $5.61 \times 10^{-6}$ | $9.92 \times 10^{-5}$ |
| LJP005 SKBR3 3H-CGP-60474-0.37     | 7/87   | $7.10 \times 10^{-6}$ | $1.21 \times 10^{-4}$ |
| LJP006 HCC515 24H-CGP-60474-1.11   | 7/87   | $7.10 \times 10^{-6}$ | $1.21 \times 10^{-4}$ |
| LJP007 HT29 24H-CGP-60474-3.33     | 7/87   | $7.10 \times 10^{-6}$ | $1.20 \times 10^{-4}$ |
| LJP006 HME1 3H-CGP-60474-0.37      | 9/162  | $7.41 \times 10^{-6}$ | $1.26 \times 10^{-4}$ |
| LJP005 HEPG2 24H-CGP-60474-1.11    | 6/59   | $8.42 \times 10^{-6}$ | $1.40 \times 10^{-4}$ |
| LJP005 MDAMB231 3H-CGP-60474-3.33  | 8/125  | $8.59 \times 10^{-6}$ | $1.42 \times 10^{-4}$ |
| LJP008 HCC515 24H-CGP-60474-0.04   | 7/91   | $9.57 \times 10^{-6}$ | $1.56 \times 10^{-4}$ |
| LJP006 HME1 24H-CGP-60474-0.12     | 7/91   | $9.57 \times 10^{-6}$ | $1.56 \times 10^{-4}$ |
| LJP006 HS578T 3H-CGP-60474-1.11    | 8/127  | $9.66 \times 10^{-6}$ | $1.57 \times 10^{-4}$ |
| LJP006 MDAMB231 24H-CGP-60474-3.33 | 7/92   | $1.03 \times 10^{-5}$ | $1.66 \times 10^{-4}$ |
| LJP007 HCC515 24H-CGP-60474-0.37   | 7/92   | $1.03 \times 10^{-5}$ | $1.65 \times 10^{-4}$ |
| LJP007 HT29 24H-CGP-60474-0.12     | 7/92   | $1.03 \times 10^{-5}$ | $1.65 \times 10^{-4}$ |
| LJP007 HEPG2 24H-CGP-60474-0.04    | 6/62   | $1.13 \times 10^{-5}$ | $1.79 \times 10^{-4}$ |
| LJP008 MCF7 24H-CGP-60474-0.04     | 7/94   | $1.19 \times 10^{-5}$ | $1.88 \times 10^{-4}$ |
| LJP006 BT20 3H-CGP-60474-0.04      | 5/37   | $1.19 \times 10^{-5}$ | $1.88 \times 10^{-4}$ |
| LJP009 HEPG2 24H-CGP-60474-0.04    | 8/133  | $1.35 \times 10^{-5}$ | $2.11 \times 10^{-4}$ |
| LJP005 HEPG2 24H-CGP-60474-3.33    | 6/64   | $1.36 \times 10^{-5}$ | $2.11 \times 10^{-4}$ |
| LJP008 HT29 24H-CGP-60474-0.37     | 6/64   | $1.36 \times 10^{-5}$ | $2.11 \times 10^{-4}$ |
| LJP009 HEPG2 24H-CGP-60474-3.33    | 7/97   | $1.46 \times 10^{-5}$ | $2.24 \times 10^{-4}$ |
| LJP005 MCF10A 24H-CGP-60474-0.04   | 6/65   | $1.48 \times 10^{-5}$ | $2.27 \times 10^{-4}$ |
| LJP009 HT29 24H-CGP-60474-1.11     | 6/66   | $1.62 \times 10^{-5}$ | $2.45 \times 10^{-4}$ |
| LJP006 HS578T 3H-CGP-60474-3.33    | 7/99   | $1.67 \times 10^{-5}$ | $2.49 \times 10^{-4}$ |

Table S17: (Continued)

|                                    |       |                       |                       |
|------------------------------------|-------|-----------------------|-----------------------|
| LJP009 HT29 24H-CGP-60474-0.04     | 6/67  | $1.77 \times 10^{-5}$ | $2.62 \times 10^{-4}$ |
| LJP006 A549 24H-CGP-60474-0.37     | 6/67  | $1.77 \times 10^{-5}$ | $2.62 \times 10^{-4}$ |
| LJP006 MDAMB231 3H-CGP-60474-1.11  | 8/138 | $1.77 \times 10^{-5}$ | $2.61 \times 10^{-4}$ |
| LJP007 MCF7 24H-CGP-60474-3.33     | 7/101 | $1.90 \times 10^{-5}$ | $2.79 \times 10^{-4}$ |
| LJP006 HME1 3H-CGP-60474-3.33      | 8/141 | $2.07 \times 10^{-5}$ | $3.01 \times 10^{-4}$ |
| LJP006 MDAMB231 3H-CGP-60474-0.04  | 6/69  | $2.10 \times 10^{-5}$ | $3.04 \times 10^{-4}$ |
| LJP005 HS578T 24H-CGP-60474-0.37   | 7/103 | $2.16 \times 10^{-5}$ | $3.13 \times 10^{-4}$ |
| LJP009 MCF7 24H-CGP-60474-0.37     | 8/142 | $2.18 \times 10^{-5}$ | $3.15 \times 10^{-4}$ |
| LJP005 MCF10A 3H-CGP-60474-0.12    | 7/104 | $2.30 \times 10^{-5}$ | $3.28 \times 10^{-4}$ |
| LJP006 MDAMB231 3H-CGP-60474-0.37  | 7/105 | $2.45 \times 10^{-5}$ | $3.49 \times 10^{-4}$ |
| LJP008 PC3 24H-CGP-60474-3.33      | 8/145 | $2.54 \times 10^{-5}$ | $3.59 \times 10^{-4}$ |
| LJP007 HA1E 24H-CGP-60474-1.11     | 6/72  | $2.68 \times 10^{-5}$ | $3.76 \times 10^{-4}$ |
| LJP006 HS578T 3H-CGP-60474-0.12    | 7/107 | $2.76 \times 10^{-5}$ | $3.88 \times 10^{-4}$ |
| LJP006 HME1 24H-CGP-60474-3.33     | 6/73  | $2.90 \times 10^{-5}$ | $4.01 \times 10^{-4}$ |
| LJP008 A549 24H-CGP-60474-3.33     | 6/74  | $3.13 \times 10^{-5}$ | $4.31 \times 10^{-4}$ |
| LJP006 LNCAP 3H-CGP-60474-3.33     | 7/110 | $3.31 \times 10^{-5}$ | $4.51 \times 10^{-4}$ |
| LJP007 A375 24H-CGP-60474-10       | 7/110 | $3.31 \times 10^{-5}$ | $4.50 \times 10^{-4}$ |
| LJP006 MCF7 24H-CGP-60474-10       | 6/75  | $3.38 \times 10^{-5}$ | $4.58 \times 10^{-4}$ |
| LJP006 HA1E 24H-CGP-60474-0.37     | 6/76  | $3.65 \times 10^{-5}$ | $4.88 \times 10^{-4}$ |
| LJP007 PC3 24H-CGP-60474-0.04      | 6/77  | $3.93 \times 10^{-5}$ | $5.18 \times 10^{-4}$ |
| LJP006 A549 24H-CGP-60474-10       | 6/79  | $4.54 \times 10^{-5}$ | $5.85 \times 10^{-4}$ |
| LJP005 MCF10A 24H-CGP-60474-0.37   | 6/80  | $4.88 \times 10^{-5}$ | $6.21 \times 10^{-4}$ |
| LJP006 MCF7 24H-CGP-60474-1.11     | 6/80  | $4.88 \times 10^{-5}$ | $6.20 \times 10^{-4}$ |
| LJP008 A375 24H-CGP-60474-0.37     | 6/81  | $5.24 \times 10^{-5}$ | $6.62 \times 10^{-4}$ |
| LJP008 A375 24H-CGP-60474-0.12     | 6/82  | $5.61 \times 10^{-5}$ | $7.01 \times 10^{-4}$ |
| LJP005 HEPG2 24H-CGP-60474-0.37    | 6/82  | $5.61 \times 10^{-5}$ | $7.01 \times 10^{-4}$ |
| LJP005 MDAMB231 3H-CGP-60474-0.12  | 6/82  | $5.61 \times 10^{-5}$ | $7.00 \times 10^{-4}$ |
| LJP007 HCC515 24H-CGP-60474-1.11   | 6/82  | $5.61 \times 10^{-5}$ | $6.98 \times 10^{-4}$ |
| LJP006 MCF7 3H-CGP-60474-3.33      | 7/120 | $5.77 \times 10^{-5}$ | $7.17 \times 10^{-4}$ |
| LJP007 HCC515 24H-CGP-60474-3.33   | 6/83  | $6.01 \times 10^{-5}$ | $7.41 \times 10^{-4}$ |
| LJP009 A375 24H-CGP-60474-0.37     | 7/121 | $6.09 \times 10^{-5}$ | $7.50 \times 10^{-4}$ |
| LJP005 MDAMB231 24H-CGP-60474-0.12 | 4/27  | $6.45 \times 10^{-5}$ | $7.86 \times 10^{-4}$ |
| LJP005 MDAMB231 3H-CGP-60474-10    | 7/123 | $6.75 \times 10^{-5}$ | $8.17 \times 10^{-4}$ |
| LJP008 HT29 24H-CGP-60474-3.33     | 6/85  | $6.87 \times 10^{-5}$ | $8.29 \times 10^{-4}$ |
| LJP006 MDAMB231 3H-CGP-60474-0.12  | 7/125 | $7.48 \times 10^{-5}$ | $8.86 \times 10^{-4}$ |
| LJP006 HS578T 24H-CGP-60474-1.11   | 6/87  | $7.83 \times 10^{-5}$ | $9.18 \times 10^{-4}$ |
| LJP007 HCC515 24H-CGP-60474-0.12   | 6/87  | $7.83 \times 10^{-5}$ | $9.17 \times 10^{-4}$ |
| LJP005 MDAMB231 3H-CGP-60474-0.37  | 7/129 | $9.12 \times 10^{-5}$ | $1.04 \times 10^{-3}$ |
| LJP006 LNCAP 24H-CGP-60474-1.11    | 7/129 | $9.12 \times 10^{-5}$ | $1.04 \times 10^{-3}$ |
| LJP005 HS578T 3H-CGP-60474-0.04    | 5/56  | $9.23 \times 10^{-5}$ | $1.05 \times 10^{-3}$ |
| LJP006 LNCAP 24H-CGP-60474-0.12    | 7/130 | $9.58 \times 10^{-5}$ | $1.08 \times 10^{-3}$ |
| LJP006 PC3 24H-CGP-60474-10        | 5/57  | $1.01 \times 10^{-4}$ | $1.13 \times 10^{-3}$ |
| LJP005 PC3 24H-CGP-60474-3.33      | 6/92  | $1.07 \times 10^{-4}$ | $1.19 \times 10^{-3}$ |
| LJP006 HA1E 24H-CGP-60474-10       | 5/60  | $1.29 \times 10^{-4}$ | $1.39 \times 10^{-3}$ |
| LJP009 HCC515 24H-CGP-60474-10     | 6/96  | $1.35 \times 10^{-4}$ | $1.46 \times 10^{-3}$ |
| LJP005 HA1E 24H-CGP-60474-0.12     | 6/96  | $1.35 \times 10^{-4}$ | $1.46 \times 10^{-3}$ |
| LJP007 HCC515 24H-CGP-60474-0.04   | 6/96  | $1.35 \times 10^{-4}$ | $1.45 \times 10^{-3}$ |
| LJP008 HA1E 24H-CGP-60474-1.11     | 6/97  | $1.43 \times 10^{-4}$ | $1.53 \times 10^{-3}$ |
| LJP005 SKBR3 24H-CGP-60474-0.12    | 6/97  | $1.43 \times 10^{-4}$ | $1.53 \times 10^{-3}$ |
| LJP006 HME1 24H-CGP-60474-0.37     | 6/97  | $1.43 \times 10^{-4}$ | $1.53 \times 10^{-3}$ |
| LJP007 A549 24H-CGP-60474-3.33     | 4/33  | $1.45 \times 10^{-4}$ | $1.53 \times 10^{-3}$ |
| LJP005 BT20 3H-CGP-60474-0.04      | 4/34  | $1.63 \times 10^{-4}$ | $1.70 \times 10^{-3}$ |
| LJP007 HA1E 24H-CGP-60474-0.37     | 6/100 | $1.69 \times 10^{-4}$ | $1.75 \times 10^{-3}$ |
| LJP006 LNCAP 24H-CGP-60474-0.37    | 7/144 | $1.81 \times 10^{-4}$ | $1.86 \times 10^{-3}$ |
| LJP006 BT20 3H-CGP-60474-0.12      | 4/35  | $1.83 \times 10^{-4}$ | $1.87 \times 10^{-3}$ |
| LJP009 HA1E 24H-CGP-60474-3.33     | 6/107 | $2.45 \times 10^{-4}$ | $2.41 \times 10^{-3}$ |
| LJP006 MCF10A 24H-CGP-60474-0.04   | 5/69  | $2.49 \times 10^{-4}$ | $2.45 \times 10^{-3}$ |



Table S17: (Continued)

|                                    |       |                       |                       |
|------------------------------------|-------|-----------------------|-----------------------|
| LJP006 A375 24H-CGP-60474-10       | 6/108 | $2.58 \times 10^{-4}$ | $2.51 \times 10^{-3}$ |
| LJP005 MCF10A 3H-CGP-60474-0.37    | 7/154 | $2.73 \times 10^{-4}$ | $2.65 \times 10^{-3}$ |
| LJP008 MCF7 24H-CGP-60474-10       | 5/71  | $2.85 \times 10^{-4}$ | $2.73 \times 10^{-3}$ |
| LJP009 A375 24H-CGP-60474-1.11     | 6/112 | $3.14 \times 10^{-4}$ | $2.96 \times 10^{-3}$ |
| LJP005 MCF10A 3H-CGP-60474-3.33    | 5/73  | $3.25 \times 10^{-4}$ | $3.06 \times 10^{-3}$ |
| LJP006 HEPG2 24H-CGP-60474-0.37    | 5/73  | $3.25 \times 10^{-4}$ | $3.06 \times 10^{-3}$ |
| LJP006 PC3 24H-CGP-60474-3.33      | 4/41  | $3.40 \times 10^{-4}$ | $3.16 \times 10^{-3}$ |
| LJP009 HA1E 24H-CGP-60474-1.11     | 5/76  | $3.92 \times 10^{-4}$ | $3.57 \times 10^{-3}$ |
| LJP006 HA1E 24H-CGP-60474-0.04     | 5/76  | $3.92 \times 10^{-4}$ | $3.57 \times 10^{-3}$ |
| LJP008 HEPG2 24H-CGP-60474-0.37    | 6/118 | $4.15 \times 10^{-4}$ | $3.73 \times 10^{-3}$ |
| LJP006 LNCAP 3H-CGP-60474-0.37     | 6/119 | $4.34 \times 10^{-4}$ | $3.88 \times 10^{-3}$ |
| LJP006 SKBR3 3H-CGP-60474-10       | 6/119 | $4.34 \times 10^{-4}$ | $3.88 \times 10^{-3}$ |
| LJP005 HCC515 24H-CGP-60474-0.12   | 5/78  | $4.42 \times 10^{-4}$ | $3.94 \times 10^{-3}$ |
| LJP006 MCF7 3H-CGP-60474-0.37      | 7/167 | $4.46 \times 10^{-4}$ | $3.97 \times 10^{-3}$ |
| LJP006 HT29 24H-CGP-60474-1.11     | 5/80  | $4.97 \times 10^{-4}$ | $4.34 \times 10^{-3}$ |
| LJP006 MDAMB231 3H-CGP-60474-10    | 7/170 | $4.97 \times 10^{-4}$ | $4.34 \times 10^{-3}$ |
| LJP005 HS578T 3H-CGP-60474-0.12    | 5/81  | $5.26 \times 10^{-4}$ | $4.58 \times 10^{-3}$ |
| LJP007 A375 24H-CGP-60474-1.11     | 5/81  | $5.26 \times 10^{-4}$ | $4.57 \times 10^{-3}$ |
| LJP005 A375 24H-CGP-60474-1.11     | 5/82  | $5.56 \times 10^{-4}$ | $4.78 \times 10^{-3}$ |
| LJP006 MCF7 3H-CGP-60474-1.11      | 6/125 | $5.64 \times 10^{-4}$ | $4.83 \times 10^{-3}$ |
| LJP006 BT20 3H-CGP-60474-10        | 4/48  | $6.26 \times 10^{-4}$ | $5.26 \times 10^{-3}$ |
| LJP005 HA1E 24H-CGP-60474-0.37     | 5/86  | $6.92 \times 10^{-4}$ | $5.73 \times 10^{-3}$ |
| LJP008 A375 24H-CGP-60474-10       | 5/88  | $7.68 \times 10^{-4}$ | $6.27 \times 10^{-3}$ |
| LJP008 A549 24H-CGP-60474-0.04     | 6/133 | $7.82 \times 10^{-4}$ | $6.37 \times 10^{-3}$ |
| LJP009 MCF7 24H-CGP-60474-10       | 6/134 | $8.13 \times 10^{-4}$ | $6.57 \times 10^{-3}$ |
| LJP005 MCF7 3H-CGP-60474-3.33      | 5/90  | $8.51 \times 10^{-4}$ | $6.80 \times 10^{-3}$ |
| LJP009 MCF7 24H-CGP-60474-1.11     | 6/136 | $8.78 \times 10^{-4}$ | $7.01 \times 10^{-3}$ |
| LJP005 SKBR3 3H-CGP-60474-0.12     | 4/54  | $9.79 \times 10^{-4}$ | $7.70 \times 10^{-3}$ |
| LJP006 LNCAP 3H-CGP-60474-0.04     | 5/93  | $9.86 \times 10^{-4}$ | $7.71 \times 10^{-3}$ |
| LJP006 BT20 3H-CGP-60474-3.33      | 4/56  | $1.12 \times 10^{-3}$ | $8.61 \times 10^{-3}$ |
| LJP006 HA1E 24H-CGP-60474-0.12     | 5/97  | $1.19 \times 10^{-3}$ | $9.08 \times 10^{-3}$ |
| LJP006 HT29 24H-CGP-60474-0.37     | 5/97  | $1.19 \times 10^{-3}$ | $9.07 \times 10^{-3}$ |
| LJP005 A375 24H-CGP-60474-0.04     | 4/57  | $1.20 \times 10^{-3}$ | $9.12 \times 10^{-3}$ |
| LJP005 BT20 3H-CGP-60474-10        | 4/57  | $1.20 \times 10^{-3}$ | $9.11 \times 10^{-3}$ |
| LJP008 PC3 24H-CGP-60474-0.04      | 6/145 | $1.22 \times 10^{-3}$ | $9.23 \times 10^{-3}$ |
| LJP007 HEPG2 24H-CGP-60474-0.12    | 4/60  | $1.45 \times 10^{-3}$ | $1.07 \times 10^{-2}$ |
| LJP007 MCF7 24H-CGP-60474-10       | 5/103 | $1.56 \times 10^{-3}$ | $1.13 \times 10^{-2}$ |
| LJP005 MCF7 3H-CGP-60474-0.37      | 6/152 | $1.56 \times 10^{-3}$ | $1.13 \times 10^{-2}$ |
| LJP006 HA1E 24H-CGP-60474-1.11     | 4/62  | $1.64 \times 10^{-3}$ | $1.18 \times 10^{-2}$ |
| LJP007 A549 24H-CGP-60474-10       | 3/29  | $1.66 \times 10^{-3}$ | $1.19 \times 10^{-2}$ |
| LJP005 A549 24H-CGP-60474-0.04     | 4/64  | $1.85 \times 10^{-3}$ | $1.30 \times 10^{-2}$ |
| LJP006 A375 24H-CGP-60474-1.11     | 4/64  | $1.85 \times 10^{-3}$ | $1.30 \times 10^{-2}$ |
| LJP006 MCF7 3H-CGP-60474-0.04      | 4/64  | $1.85 \times 10^{-3}$ | $1.30 \times 10^{-2}$ |
| LJP009 MCF7 24H-CGP-60474-0.12     | 6/158 | $1.89 \times 10^{-3}$ | $1.33 \times 10^{-2}$ |
| LJP006 PC3 24H-CGP-60474-1.11      | 4/66  | $2.07 \times 10^{-3}$ | $1.43 \times 10^{-2}$ |
| LJP009 PC3 24H-CGP-60474-10        | 5/110 | $2.08 \times 10^{-3}$ | $1.43 \times 10^{-2}$ |
| LJP005 HS578T 24H-CGP-60474-0.04   | 4/67  | $2.19 \times 10^{-3}$ | $1.50 \times 10^{-2}$ |
| LJP007 HA1E 24H-CGP-60474-3.33     | 4/70  | $2.57 \times 10^{-3}$ | $1.71 \times 10^{-2}$ |
| LJP008 A375 24H-CGP-60474-3.33     | 4/72  | $2.84 \times 10^{-3}$ | $1.87 \times 10^{-2}$ |
| LJP006 MCF7 3H-CGP-60474-10        | 5/119 | $2.93 \times 10^{-3}$ | $1.90 \times 10^{-2}$ |
| LJP006 LNCAP 24H-CGP-60474-10      | 5/122 | $3.26 \times 10^{-3}$ | $2.08 \times 10^{-2}$ |
| LJP006 MCF7 24H-CGP-60474-0.37     | 4/76  | $3.46 \times 10^{-3}$ | $2.18 \times 10^{-2}$ |
| LJP005 HS578T 3H-CGP-60474-10      | 5/125 | $3.62 \times 10^{-3}$ | $2.27 \times 10^{-2}$ |
| LJP005 HT29 24H-CGP-60474-0.12     | 4/78  | $3.80 \times 10^{-3}$ | $2.35 \times 10^{-2}$ |
| LJP008 HT29 24H-CGP-60474-0.04     | 4/79  | $3.98 \times 10^{-3}$ | $2.43 \times 10^{-2}$ |
| LJP006 MDAMB231 24H-CGP-60474-0.12 | 4/79  | $3.98 \times 10^{-3}$ | $2.43 \times 10^{-2}$ |
| LJP007 HA1E 24H-CGP-60474-0.12     | 5/138 | $5.49 \times 10^{-3}$ | $3.17 \times 10^{-2}$ |

Table S17: (Continued)

|                                    |       |                       |                       |
|------------------------------------|-------|-----------------------|-----------------------|
| LJP005 MDAMB231 24H-CGP-60474-0.37 | 3/44  | $5.51 \times 10^{-3}$ | $3.16 \times 10^{-2}$ |
| LJP007 PC3 24H-CGP-60474-3.33      | 4/87  | $5.60 \times 10^{-3}$ | $3.20 \times 10^{-2}$ |
| LJP007 MCF7 24H-CGP-60474-1.11     | 5/139 | $5.66 \times 10^{-3}$ | $3.22 \times 10^{-2}$ |
| LJP005 A375 24H-CGP-60474-3.33     | 4/88  | $5.83 \times 10^{-3}$ | $3.31 \times 10^{-2}$ |
| LJP007 PC3 24H-CGP-60474-10        | 4/88  | $5.83 \times 10^{-3}$ | $3.31 \times 10^{-2}$ |
| LJP006 BT20 3H-CGP-60474-0.37      | 3/49  | $7.44 \times 10^{-3}$ | $3.99 \times 10^{-2}$ |
| LJP007 MCF7 24H-CGP-60474-0.37     | 5/149 | $7.55 \times 10^{-3}$ | $4.04 \times 10^{-2}$ |
| LJP009 MCF7 24H-CGP-60474-3.33     | 5/151 | $7.98 \times 10^{-3}$ | $4.23 \times 10^{-2}$ |
| LJP008 MCF7 24H-CGP-60474-1.11     | 4/98  | $8.49 \times 10^{-3}$ | $4.44 \times 10^{-2}$ |
| LJP005 SKBR3 3H-CGP-60474-3.33     | 4/98  | $8.49 \times 10^{-3}$ | $4.43 \times 10^{-2}$ |
| LJP005 HS578T 3H-CGP-60474-1.11    | 5/159 | $9.84 \times 10^{-3}$ | $5.00 \times 10^{-2}$ |

Table S18: Alvocidib significantly affects the expression of the selected 163 genes as evident in the ‘LINCS L1000 Chem Pert up’ category in Enrichr. The last number after the - is dose density.

| Term                              | Overlap | P-value               | Adjusted P-value      |
|-----------------------------------|---------|-----------------------|-----------------------|
| LINCS L1000 Chem Pert up          |         |                       |                       |
| LJP006 MCF7 3H-alvocidib-10       | 9/87    | $3.79 \times 10^{-8}$ | $1.57 \times 10^{-6}$ |
| LJP006 SKBR3 24H-alvocidib-1.11   | 9/116   | $4.60 \times 10^{-7}$ | $1.29 \times 10^{-5}$ |
| LJP006 HME1 3H-alvocidib-0.12     | 7/82    | $4.78 \times 10^{-6}$ | $9.07 \times 10^{-5}$ |
| LJP006 HS578T 3H-alvocidib-0.37   | 6/61    | $1.02 \times 10^{-5}$ | $1.69 \times 10^{-4}$ |
| LJP006 BT20 24H-alvocidib-3.33    | 7/108   | $2.94 \times 10^{-5}$ | $4.11 \times 10^{-4}$ |
| LJP006 HME1 3H-alvocidib-1.11     | 5/56    | $9.23 \times 10^{-5}$ | $1.07 \times 10^{-3}$ |
| LJP006 BT20 24H-alvocidib-0.04    | 5/57    | $1.01 \times 10^{-4}$ | $1.15 \times 10^{-3}$ |
| LJP006 SKBR3 3H-alvocidib-0.37    | 5/57    | $1.01 \times 10^{-4}$ | $1.15 \times 10^{-3}$ |
| LJP006 BT20 24H-alvocidib-1.11    | 6/98    | $1.52 \times 10^{-4}$ | $1.62 \times 10^{-3}$ |
| LJP006 MCF10A 24H-alvocidib-0.04  | 6/106   | $2.33 \times 10^{-4}$ | $2.31 \times 10^{-3}$ |
| LJP006 MCF10A 24H-alvocidib-10    | 7/150   | $2.33 \times 10^{-4}$ | $2.31 \times 10^{-3}$ |
| LJP006 SKBR3 3H-alvocidib-0.12    | 5/71    | $2.85 \times 10^{-4}$ | $2.74 \times 10^{-3}$ |
| LJP006 BT20 24H-alvocidib-10      | 5/78    | $4.42 \times 10^{-4}$ | $3.96 \times 10^{-3}$ |
| LJP006 LNCAP 24H-alvocidib-3.33   | 5/80    | $4.97 \times 10^{-4}$ | $4.36 \times 10^{-3}$ |
| LJP006 HS578T 3H-alvocidib-0.12   | 5/85    | $6.56 \times 10^{-4}$ | $5.52 \times 10^{-3}$ |
| LJP006 SKBR3 24H-alvocidib-3.33   | 6/129   | $6.66 \times 10^{-4}$ | $5.60 \times 10^{-3}$ |
| LJP006 HME1 3H-alvocidib-0.37     | 4/51    | $7.89 \times 10^{-4}$ | $6.42 \times 10^{-3}$ |
| LJP006 HEPG2 24H-alvocidib-10     | 5/91    | $8.94 \times 10^{-4}$ | $7.15 \times 10^{-3}$ |
| LJP006 LNCAP 24H-alvocidib-0.04   | 6/140   | $1.02 \times 10^{-3}$ | $7.97 \times 10^{-3}$ |
| LJP006 MCF10A 24H-alvocidib-3.33  | 6/146   | $1.27 \times 10^{-3}$ | $9.48 \times 10^{-3}$ |
| LJP006 MCF7 3H-alvocidib-0.37     | 4/60    | $1.45 \times 10^{-3}$ | $1.06 \times 10^{-2}$ |
| LJP006 PC3 24H-alvocidib-10       | 6/152   | $1.56 \times 10^{-3}$ | $1.12 \times 10^{-2}$ |
| LJP006 HS578T 3H-alvocidib-10     | 4/63    | $1.74 \times 10^{-3}$ | $1.23 \times 10^{-2}$ |
| LJP006 LNCAP 3H-alvocidib-0.37    | 4/63    | $1.74 \times 10^{-3}$ | $1.23 \times 10^{-2}$ |
| LJP006 BT20 24H-alvocidib-0.12    | 5/106   | $1.77 \times 10^{-3}$ | $1.24 \times 10^{-2}$ |
| LJP006 HS578T 3H-alvocidib-0.04   | 4/64    | $1.85 \times 10^{-3}$ | $1.28 \times 10^{-2}$ |
| LJP006 MCF7 3H-alvocidib-3.33     | 4/67    | $2.19 \times 10^{-3}$ | $1.48 \times 10^{-2}$ |
| LJP006 MDAMB231 3H-alvocidib-1.11 | 4/67    | $2.19 \times 10^{-3}$ | $1.48 \times 10^{-2}$ |
| LJP006 SKBR3 3H-alvocidib-1.11    | 4/67    | $2.19 \times 10^{-3}$ | $1.48 \times 10^{-2}$ |
| LJP006 HCC515 24H-alvocidib-10    | 7/221   | $2.27 \times 10^{-3}$ | $1.53 \times 10^{-2}$ |
| LJP006 MCF7 3H-alvocidib-0.04     | 3/37    | $3.37 \times 10^{-3}$ | $2.11 \times 10^{-2}$ |
| LJP006 A549 24H-alvocidib-10      | 6/180   | $3.62 \times 10^{-3}$ | $2.24 \times 10^{-2}$ |
| LJP006 MCF7 24H-alvocidib-0.04    | 3/47    | $6.63 \times 10^{-3}$ | $3.57 \times 10^{-2}$ |
| LJP006 MCF7 3H-alvocidib-0.12     | 3/47    | $6.63 \times 10^{-3}$ | $3.56 \times 10^{-2}$ |
| LJP006 MCF10A 24H-alvocidib-0.12  | 5/146   | $6.94 \times 10^{-3}$ | $3.71 \times 10^{-2}$ |
| LJP006 SKBR3 24H-alvocidib-0.37   | 4/93    | $7.08 \times 10^{-3}$ | $3.76 \times 10^{-2}$ |
| LJP006 HA1E 24H-alvocidib-1.11    | 6/218   | $9.03 \times 10^{-3}$ | $4.56 \times 10^{-2}$ |
| LJP006 MCF10A 3H-alvocidib-3.33   | 3/54    | $9.73 \times 10^{-3}$ | $4.82 \times 10^{-2}$ |

Table S19: Alvocidib significantly affects the expression of the selected 163 genes as evident in the ‘LINCS L1000 Chem Pert down’ category in Enrichr. The last number after the - is dose density.

| Term                               | Overlap | P-value                | Adjusted P-value       |
|------------------------------------|---------|------------------------|------------------------|
| LINCS L1000 Chem Pert down         |         |                        |                        |
| LJP006 SKBR3 24H-alvocidib-0.12    | 18/111  | $1.20 \times 10^{-18}$ | $6.61 \times 10^{-15}$ |
| LJP006 MCF10A 24H-alvocidib-3.33   | 12/92   | $1.18 \times 10^{-11}$ | $1.78 \times 10^{-9}$  |
| LJP006 SKBR3 24H-alvocidib-0.37    | 12/92   | $1.18 \times 10^{-11}$ | $1.78 \times 10^{-9}$  |
| LJP006 SKBR3 24H-alvocidib-10      | 12/95   | $1.74 \times 10^{-11}$ | $2.47 \times 10^{-9}$  |
| LJP006 BT20 24H-alvocidib-0.12     | 13/134  | $7.29 \times 10^{-11}$ | $8.13 \times 10^{-9}$  |
| LJP006 HME1 3H-alvocidib-1.11      | 14/166  | $8.78 \times 10^{-11}$ | $9.35 \times 10^{-9}$  |
| LJP006 MCF10A 24H-alvocidib-0.12   | 11/89   | $1.58 \times 10^{-10}$ | $1.52 \times 10^{-8}$  |
| LJP006 SKBR3 24H-alvocidib-3.33    | 12/115  | $1.71 \times 10^{-10}$ | $1.61 \times 10^{-8}$  |
| LJP006 HME1 3H-alvocidib-3.33      | 14/194  | $6.96 \times 10^{-10}$ | $5.20 \times 10^{-8}$  |
| LJP006 MCF10A 3H-alvocidib-0.37    | 12/143  | $2.16 \times 10^{-9}$  | $1.33 \times 10^{-7}$  |
| LJP006 HCC515 24H-alvocidib-10     | 11/118  | $3.39 \times 10^{-9}$  | $1.94 \times 10^{-7}$  |
| LJP006 HME1 3H-alvocidib-0.37      | 13/194  | $7.11 \times 10^{-9}$  | $3.61 \times 10^{-7}$  |
| LJP006 HS578T 3H-alvocidib-10      | 11/143  | $2.57 \times 10^{-8}$  | $1.04 \times 10^{-6}$  |
| LJP006 HA1E 24H-alvocidib-0.04     | 12/188  | $4.72 \times 10^{-8}$  | $1.78 \times 10^{-6}$  |
| LJP006 SKBR3 24H-alvocidib-1.11    | 9/93    | $6.81 \times 10^{-8}$  | $2.41 \times 10^{-6}$  |
| LJP006 LNCAP 3H-alvocidib-10       | 10/131  | $1.21 \times 10^{-7}$  | $3.94 \times 10^{-6}$  |
| LJP006 SKBR3 3H-alvocidib-1.11     | 9/104   | $1.80 \times 10^{-7}$  | $5.53 \times 10^{-6}$  |
| LJP006 MCF10A 3H-alvocidib-10      | 10/146  | $3.35 \times 10^{-7}$  | $9.25 \times 10^{-6}$  |
| LJP006 MCF7 24H-alvocidib-3.33     | 6/35    | $3.57 \times 10^{-7}$  | $9.71 \times 10^{-6}$  |
| LJP006 HME1 3H-alvocidib-10        | 9/114   | $3.97 \times 10^{-7}$  | $1.06 \times 10^{-5}$  |
| LJP006 BT20 24H-alvocidib-3.33     | 9/115   | $4.27 \times 10^{-7}$  | $1.13 \times 10^{-5}$  |
| LJP006 SKBR3 3H-alvocidib-0.37     | 8/86    | $5.07 \times 10^{-7}$  | $1.29 \times 10^{-5}$  |
| LJP006 A549 24H-alvocidib-10       | 8/94    | $1.01 \times 10^{-6}$  | $2.33 \times 10^{-5}$  |
| LJP006 BT20 24H-alvocidib-10       | 8/94    | $1.01 \times 10^{-6}$  | $2.32 \times 10^{-5}$  |
| LJP006 SKBR3 3H-alvocidib-10       | 8/97    | $1.28 \times 10^{-6}$  | $2.85 \times 10^{-5}$  |
| LJP006 HME1 24H-alvocidib-0.12     | 8/99    | $1.50 \times 10^{-6}$  | $3.23 \times 10^{-5}$  |
| LJP006 LNCAP 24H-alvocidib-10      | 8/101   | $1.74 \times 10^{-6}$  | $3.68 \times 10^{-5}$  |
| LJP006 MCF10A 24H-alvocidib-10     | 7/71    | $1.80 \times 10^{-6}$  | $3.77 \times 10^{-5}$  |
| LJP006 HA1E 24H-alvocidib-10       | 7/72    | $1.98 \times 10^{-6}$  | $4.09 \times 10^{-5}$  |
| LJP006 MCF7 3H-alvocidib-1.11      | 7/74    | $2.39 \times 10^{-6}$  | $4.78 \times 10^{-5}$  |
| LJP006 HME1 3H-alvocidib-0.12      | 9/146   | $3.17 \times 10^{-6}$  | $6.04 \times 10^{-5}$  |
| LJP006 MDAMB231 24H-alvocidib-1.11 | 7/82    | $4.78 \times 10^{-6}$  | $8.68 \times 10^{-5}$  |
| LJP006 MCF7 24H-alvocidib-0.37     | 5/31    | $4.84 \times 10^{-6}$  | $8.76 \times 10^{-5}$  |
| LJP006 LNCAP 24H-alvocidib-1.11    | 8/116   | $4.94 \times 10^{-6}$  | $8.92 \times 10^{-5}$  |
| LJP006 HA1E 24H-alvocidib-0.12     | 7/83    | $5.18 \times 10^{-6}$  | $9.29 \times 10^{-5}$  |
| LJP006 HS578T 24H-alvocidib-3.33   | 7/83    | $5.18 \times 10^{-6}$  | $9.28 \times 10^{-5}$  |
| LJP006 MCF10A 3H-alvocidib-0.12    | 8/120   | $6.35 \times 10^{-6}$  | $1.10 \times 10^{-4}$  |
| LJP006 MCF10A 3H-alvocidib-1.11    | 8/122   | $7.18 \times 10^{-6}$  | $1.22 \times 10^{-4}$  |
| LJP006 LNCAP 24H-alvocidib-3.33    | 6/58    | $7.62 \times 10^{-6}$  | $1.29 \times 10^{-4}$  |
| LJP006 HA1E 24H-alvocidib-0.37     | 7/89    | $8.26 \times 10^{-6}$  | $1.37 \times 10^{-4}$  |
| LJP006 MDAMB231 24H-alvocidib-10   | 6/61    | $1.02 \times 10^{-5}$  | $1.65 \times 10^{-4}$  |
| LJP006 SKBR3 24H-alvocidib-0.04    | 7/99    | $1.67 \times 10^{-5}$  | $2.49 \times 10^{-4}$  |
| LJP006 HT29 24H-alvocidib-10       | 6/67    | $1.77 \times 10^{-5}$  | $2.61 \times 10^{-4}$  |
| LJP006 HME1 24H-alvocidib-0.37     | 7/103   | $2.16 \times 10^{-5}$  | $3.12 \times 10^{-4}$  |
| LJP006 HS578T 3H-alvocidib-1.11    | 7/105   | $2.45 \times 10^{-5}$  | $3.49 \times 10^{-4}$  |
| LJP006 HEPG2 24H-alvocidib-10      | 6/75    | $3.38 \times 10^{-5}$  | $4.58 \times 10^{-4}$  |
| LJP006 LNCAP 3H-alvocidib-0.37     | 7/111   | $3.50 \times 10^{-5}$  | $4.73 \times 10^{-4}$  |
| LJP006 LNCAP 24H-alvocidib-0.12    | 7/112   | $3.71 \times 10^{-5}$  | $4.94 \times 10^{-4}$  |
| LJP006 MDAMB231 3H-alvocidib-3.33  | 7/114   | $4.16 \times 10^{-5}$  | $5.44 \times 10^{-4}$  |
| LJP006 HS578T 3H-alvocidib-0.12    | 8/156   | $4.28 \times 10^{-5}$  | $5.56 \times 10^{-4}$  |
| LJP006 MDAMB231 3H-alvocidib-0.12  | 8/156   | $4.28 \times 10^{-5}$  | $5.56 \times 10^{-4}$  |
| LJP006 MDAMB231 3H-alvocidib-0.37  | 7/120   | $5.77 \times 10^{-5}$  | $7.17 \times 10^{-4}$  |
| LJP006 MCF10A 3H-alvocidib-0.04    | 7/123   | $6.75 \times 10^{-5}$  | $8.16 \times 10^{-4}$  |
| LJP006 BT20 24H-alvocidib-0.37     | 7/124   | $7.11 \times 10^{-5}$  | $8.51 \times 10^{-4}$  |

Table S19: (Continued)

|                                    |       |                       |                       |
|------------------------------------|-------|-----------------------|-----------------------|
| LJP006 HA1E 24H-alvocidib-3.33     | 6/86  | $7.33 \times 10^{-5}$ | $8.75 \times 10^{-4}$ |
| LJP006 MCF7 3H-alvocidib-3.33      | 7/125 | $7.48 \times 10^{-5}$ | $8.86 \times 10^{-4}$ |
| LJP006 HS578T 24H-alvocidib-0.37   | 6/89  | $8.89 \times 10^{-5}$ | $1.02 \times 10^{-3}$ |
| LJP006 MCF7 24H-alvocidib-10       | 5/57  | $1.01 \times 10^{-4}$ | $1.13 \times 10^{-3}$ |
| LJP006 HS578T 24H-alvocidib-1.11   | 6/91  | $1.01 \times 10^{-4}$ | $1.12 \times 10^{-3}$ |
| LJP006 MCF7 3H-alvocidib-10        | 7/132 | $1.05 \times 10^{-4}$ | $1.18 \times 10^{-3}$ |
| LJP006 BT20 3H-alvocidib-0.37      | 5/62  | $1.50 \times 10^{-4}$ | $1.59 \times 10^{-3}$ |
| LJP006 LNCAP 24H-alvocidib-0.37    | 7/140 | $1.52 \times 10^{-4}$ | $1.60 \times 10^{-3}$ |
| LJP006 MCF10A 3H-alvocidib-3.33    | 7/143 | $1.74 \times 10^{-4}$ | $1.79 \times 10^{-3}$ |
| LJP006 HS578T 3H-alvocidib-3.33    | 7/148 | $2.14 \times 10^{-4}$ | $2.15 \times 10^{-3}$ |
| LJP006 MDAMB231 3H-alvocidib-1.11  | 7/149 | $2.23 \times 10^{-4}$ | $2.23 \times 10^{-3}$ |
| LJP006 MCF7 3H-alvocidib-0.37      | 6/108 | $2.58 \times 10^{-4}$ | $2.51 \times 10^{-3}$ |
| LJP006 LNCAP 3H-alvocidib-1.11     | 6/112 | $3.14 \times 10^{-4}$ | $2.96 \times 10^{-3}$ |
| LJP006 BT20 24H-alvocidib-0.04     | 5/73  | $3.25 \times 10^{-4}$ | $3.06 \times 10^{-3}$ |
| LJP006 SKBR3 3H-alvocidib-0.12     | 6/113 | $3.29 \times 10^{-4}$ | $3.08 \times 10^{-3}$ |
| LJP006 MCF7 3H-alvocidib-0.12      | 6/121 | $4.75 \times 10^{-4}$ | $4.18 \times 10^{-3}$ |
| LJP006 MDAMB231 24H-alvocidib-3.33 | 5/82  | $5.56 \times 10^{-4}$ | $4.77 \times 10^{-3}$ |
| LJP006 HME1 24H-alvocidib-3.33     | 5/83  | $5.88 \times 10^{-4}$ | $4.99 \times 10^{-3}$ |
| LJP006 LNCAP 3H-alvocidib-0.12     | 6/127 | $6.13 \times 10^{-4}$ | $5.19 \times 10^{-3}$ |
| LJP006 MDAMB231 3H-alvocidib-0.04  | 5/87  | $7.29 \times 10^{-4}$ | $6.01 \times 10^{-3}$ |
| LJP006 LNCAP 24H-alvocidib-0.04    | 8/238 | $7.64 \times 10^{-4}$ | $6.24 \times 10^{-3}$ |
| LJP006 HS578T 24H-alvocidib-0.04   | 4/51  | $7.89 \times 10^{-4}$ | $6.40 \times 10^{-3}$ |
| LJP006 HS578T 24H-alvocidib-0.12   | 5/89  | $8.09 \times 10^{-4}$ | $6.54 \times 10^{-3}$ |
| LJP006 MDAMB231 3H-alvocidib-10    | 6/139 | $9.84 \times 10^{-4}$ | $7.70 \times 10^{-3}$ |
| LJP006 HS578T 3H-alvocidib-0.37    | 6/141 | $1.06 \times 10^{-3}$ | $8.19 \times 10^{-3}$ |
| LJP006 BT20 24H-alvocidib-1.11     | 5/95  | $1.09 \times 10^{-3}$ | $8.35 \times 10^{-3}$ |
| LJP006 HME1 3H-alvocidib-0.04      | 6/142 | $1.10 \times 10^{-3}$ | $8.44 \times 10^{-3}$ |
| LJP006 SKBR3 3H-alvocidib-0.04     | 4/59  | $1.37 \times 10^{-3}$ | $1.01 \times 10^{-2}$ |
| LJP006 HME1 24H-alvocidib-0.04     | 5/108 | $1.92 \times 10^{-3}$ | $1.35 \times 10^{-2}$ |
| LJP006 A375 24H-alvocidib-10       | 5/109 | $2.00 \times 10^{-3}$ | $1.39 \times 10^{-2}$ |
| LJP006 BT20 3H-alvocidib-10        | 3/40  | $4.21 \times 10^{-3}$ | $2.55 \times 10^{-2}$ |
| LJP006 HS578T 24H-alvocidib-10     | 4/86  | $5.38 \times 10^{-3}$ | $3.10 \times 10^{-2}$ |
| LJP006 HME1 24H-alvocidib-1.11     | 4/88  | $5.83 \times 10^{-3}$ | $3.31 \times 10^{-2}$ |
| LJP006 HA1E 24H-alvocidib-1.11     | 4/89  | $6.07 \times 10^{-3}$ | $3.40 \times 10^{-2}$ |
| LJP006 MDAMB231 24H-alvocidib-0.37 | 4/92  | $6.82 \times 10^{-3}$ | $3.73 \times 10^{-2}$ |
| LJP006 MDAMB231 24H-alvocidib-0.04 | 3/48  | $7.03 \times 10^{-3}$ | $3.82 \times 10^{-2}$ |
| LJP006 MCF7 24H-alvocidib-0.12     | 2/17  | $8.29 \times 10^{-3}$ | $4.36 \times 10^{-2}$ |
| LJP006 HS578T 3H-alvocidib-0.04    | 4/99  | $8.79 \times 10^{-3}$ | $4.55 \times 10^{-2}$ |
| LJP006 LNCAP 3H-alvocidib-3.33     | 5/155 | $8.87 \times 10^{-3}$ | $4.59 \times 10^{-2}$ |
| LJP006 BT20 3H-alvocidib-0.12      | 3/53  | $9.24 \times 10^{-3}$ | $4.75 \times 10^{-2}$ |

Table S20: Mitoxantrone significantly affects the expression of the selected 163 genes as evident in the ‘LINCS L1000 Chem Pert up’ category in Enrichr. The last number after the - is dose density.

| Term                                  | Overlap | P-value                | Adjusted P-value       |
|---------------------------------------|---------|------------------------|------------------------|
| LINCS L1000 Chem Pert up              |         |                        |                        |
| LJP005 HEPG2 24H-mitoxantrone-0.37    | 19/142  | $5.43 \times 10^{-18}$ | $1.06 \times 10^{-14}$ |
| LJP005 HEPG2 24H-mitoxantrone-0.12    | 14/110  | $3.03 \times 10^{-13}$ | $9.65 \times 10^{-11}$ |
| LJP006 MCF7 24H-mitoxantrone-0.37     | 12/91   | $1.03 \times 10^{-11}$ | $1.81 \times 10^{-9}$  |
| LJP006 MCF7 24H-mitoxantrone-3.33     | 13/122  | $2.20 \times 10^{-11}$ | $3.30 \times 10^{-9}$  |
| LJP005 HEPG2 24H-mitoxantrone-1.11    | 13/130  | $4.96 \times 10^{-11}$ | $6.44 \times 10^{-9}$  |
| LJP006 SKBR3 24H-mitoxantrone-0.04    | 10/71   | $2.95 \times 10^{-10}$ | $2.72 \times 10^{-8}$  |
| LJP006 MCF10A 24H-mitoxantrone-3.33   | 12/155  | $5.43 \times 10^{-9}$  | $3.04 \times 10^{-7}$  |
| LJP005 MCF7 24H-mitoxantrone-0.12     | 8/60    | $2.92 \times 10^{-8}$  | $1.27 \times 10^{-6}$  |
| LJP006 HEPG2 24H-mitoxantrone-0.37    | 9/94    | $7.48 \times 10^{-8}$  | $2.82 \times 10^{-6}$  |
| LJP005 SKBR3 24H-mitoxantrone-0.12    | 8/78    | $2.37 \times 10^{-7}$  | $7.36 \times 10^{-6}$  |
| LJP006 A375 24H-mitoxantrone-10       | 9/108   | $2.50 \times 10^{-7}$  | $7.71 \times 10^{-6}$  |
| LJP005 MCF10A 24H-mitoxantrone-1.11   | 9/111   | $3.16 \times 10^{-7}$  | $9.41 \times 10^{-6}$  |
| LJP005 MDAMB231 3H-mitoxantrone-1.11  | 7/56    | $3.48 \times 10^{-7}$  | $1.02 \times 10^{-5}$  |
| LJP006 HEPG2 24H-mitoxantrone-3.33    | 11/189  | $4.41 \times 10^{-7}$  | $1.24 \times 10^{-5}$  |
| LJP006 MCF7 24H-mitoxantrone-1.11     | 9/123   | $7.57 \times 10^{-7}$  | $1.97 \times 10^{-5}$  |
| LJP006 SKBR3 24H-mitoxantrone-1.11    | 9/124   | $8.10 \times 10^{-7}$  | $2.08 \times 10^{-5}$  |
| LJP006 SKBR3 24H-mitoxantrone-0.12    | 8/92    | $8.53 \times 10^{-7}$  | $2.17 \times 10^{-5}$  |
| LJP006 HA1E 24H-mitoxantrone-0.12     | 10/163  | $9.26 \times 10^{-7}$  | $2.33 \times 10^{-5}$  |
| LJP006 SKBR3 24H-mitoxantrone-0.37    | 8/94    | $1.01 \times 10^{-6}$  | $2.48 \times 10^{-5}$  |
| LJP006 BT20 24H-mitoxantrone-0.37     | 10/165  | $1.04 \times 10^{-6}$  | $2.55 \times 10^{-5}$  |
| LJP006 SKBR3 3H-mitoxantrone-1.11     | 7/66    | $1.09 \times 10^{-6}$  | $2.66 \times 10^{-5}$  |
| LJP006 MDAMB231 3H-mitoxantrone-1.11  | 6/43    | $1.27 \times 10^{-6}$  | $3.01 \times 10^{-5}$  |
| LJP005 MCF10A 24H-mitoxantrone-10     | 8/102   | $1.88 \times 10^{-6}$  | $4.16 \times 10^{-5}$  |
| LJP007 MCF7 24H-mitoxantrone-10       | 8/103   | $2.02 \times 10^{-6}$  | $4.39 \times 10^{-5}$  |
| LJP005 MCF7 24H-mitoxantrone-1.11     | 8/110   | $3.32 \times 10^{-6}$  | $6.67 \times 10^{-5}$  |
| LJP006 SKBR3 3H-mitoxantrone-0.37     | 7/79    | $3.72 \times 10^{-6}$  | $7.29 \times 10^{-5}$  |
| LJP005 HEPG2 24H-mitoxantrone-3.33    | 10/194  | $4.46 \times 10^{-6}$  | $8.52 \times 10^{-5}$  |
| LJP006 PC3 24H-mitoxantrone-0.37      | 6/53    | $4.47 \times 10^{-6}$  | $8.52 \times 10^{-5}$  |
| LJP005 HA1E 24H-mitoxantrone-0.37     | 9/155   | $5.17 \times 10^{-6}$  | $9.71 \times 10^{-5}$  |
| LJP006 HCC515 24H-mitoxantrone-1.11   | 9/156   | $5.45 \times 10^{-6}$  | $1.02 \times 10^{-4}$  |
| LJP006 BT20 24H-mitoxantrone-1.11     | 9/157   | $5.74 \times 10^{-6}$  | $1.06 \times 10^{-4}$  |
| LJP005 HCC515 24H-mitoxantrone-0.37   | 8/123   | $7.63 \times 10^{-6}$  | $1.34 \times 10^{-4}$  |
| LJP006 BT20 24H-mitoxantrone-3.33     | 8/137   | $1.68 \times 10^{-5}$  | $2.55 \times 10^{-4}$  |
| LJP006 PC3 24H-mitoxantrone-10        | 8/139   | $1.87 \times 10^{-5}$  | $2.78 \times 10^{-4}$  |
| LJP005 MCF7 24H-mitoxantrone-10       | 6/68    | $1.93 \times 10^{-5}$  | $2.86 \times 10^{-4}$  |
| LJP005 HA1E 24H-mitoxantrone-0.04     | 6/70    | $2.28 \times 10^{-5}$  | $3.31 \times 10^{-4}$  |
| LJP006 MCF7 24H-mitoxantrone-0.12     | 6/71    | $2.47 \times 10^{-5}$  | $3.55 \times 10^{-4}$  |
| LJP005 SKBR3 3H-mitoxantrone-0.12     | 5/45    | $3.17 \times 10^{-5}$  | $4.41 \times 10^{-4}$  |
| LJP006 A549 24H-mitoxantrone-3.33     | 8/152   | $3.56 \times 10^{-5}$  | $4.84 \times 10^{-4}$  |
| LJP007 PC3 24H-mitoxantrone-10        | 7/115   | $4.40 \times 10^{-5}$  | $5.80 \times 10^{-4}$  |
| LJP005 HCC515 24H-mitoxantrone-3.33   | 8/158   | $4.68 \times 10^{-5}$  | $6.13 \times 10^{-4}$  |
| LJP005 MCF10A 3H-mitoxantrone-3.33    | 5/49    | $4.83 \times 10^{-5}$  | $6.29 \times 10^{-4}$  |
| LJP006 A549 24H-mitoxantrone-1.11     | 7/119   | $5.47 \times 10^{-5}$  | $6.99 \times 10^{-4}$  |
| LJP009 PC3 24H-mitoxantrone-10        | 8/162   | $5.59 \times 10^{-5}$  | $7.11 \times 10^{-4}$  |
| LJP008 A375 24H-mitoxantrone-10       | 7/120   | $5.77 \times 10^{-5}$  | $7.32 \times 10^{-4}$  |
| LJP005 SKBR3 24H-mitoxantrone-3.33    | 7/120   | $5.77 \times 10^{-5}$  | $7.31 \times 10^{-4}$  |
| LJP006 HEPG2 24H-mitoxantrone-1.11    | 7/120   | $5.77 \times 10^{-5}$  | $7.30 \times 10^{-4}$  |
| LJP005 HA1E 24H-mitoxantrone-0.12     | 7/121   | $6.09 \times 10^{-5}$  | $7.60 \times 10^{-4}$  |
| LJP005 MDAMB231 24H-mitoxantrone-0.37 | 5/52    | $6.45 \times 10^{-5}$  | $7.92 \times 10^{-4}$  |
| LJP005 PC3 24H-mitoxantrone-0.37      | 5/52    | $6.45 \times 10^{-5}$  | $7.91 \times 10^{-4}$  |
| LJP005 SKBR3 3H-mitoxantrone-1.11     | 6/85    | $6.87 \times 10^{-5}$  | $8.38 \times 10^{-4}$  |
| LJP006 LNCAP 24H-mitoxantrone-0.37    | 6/86    | $7.33 \times 10^{-5}$  | $8.85 \times 10^{-4}$  |
| LJP006 HME1 24H-mitoxantrone-1.11     | 7/125   | $7.48 \times 10^{-5}$  | $8.99 \times 10^{-4}$  |
| LJP006 SKBR3 3H-mitoxantrone-0.12     | 5/54    | $7.75 \times 10^{-5}$  | $9.26 \times 10^{-4}$  |

Table S20: (Continued)

|                                                   |       |                       |                       |
|---------------------------------------------------|-------|-----------------------|-----------------------|
| LJP005 HCC515 24H-mitoxantrone-1.11               | 7/126 | $7.87 \times 10^{-5}$ | $9.37 \times 10^{-4}$ |
| CPC020 PC3 6H-mitoxantrone dihydrochloride-10.0   | 6/89  | $8.89 \times 10^{-5}$ | $1.04 \times 10^{-3}$ |
| LJP005 SKBR3 3H-mitoxantrone-0.37                 | 5/56  | $9.23 \times 10^{-5}$ | $1.07 \times 10^{-3}$ |
| LJP005 A549 24H-mitoxantrone-3.33                 | 8/182 | $1.26 \times 10^{-4}$ | $1.40 \times 10^{-3}$ |
| LJP006 HA1E 24H-mitoxantrone-0.37                 | 8/183 | $1.31 \times 10^{-4}$ | $1.43 \times 10^{-3}$ |
| CPC020 PC3 24H-mitoxantrone dihydrochloride-10.0  | 8/189 | $1.64 \times 10^{-4}$ | $1.72 \times 10^{-3}$ |
| LJP005 A375 24H-mitoxantrone-0.12                 | 7/145 | $1.89 \times 10^{-4}$ | $1.93 \times 10^{-3}$ |
| LJP005 MCF10A 24H-mitoxantrone-0.37               | 6/106 | $2.33 \times 10^{-4}$ | $2.31 \times 10^{-3}$ |
| LJP006 HME1 3H-mitoxantrone-3.33                  | 5/70  | $2.67 \times 10^{-4}$ | $2.60 \times 10^{-3}$ |
| LJP006 A549 24H-mitoxantrone-0.12                 | 6/109 | $2.71 \times 10^{-4}$ | $2.63 \times 10^{-3}$ |
| LJP006 HT29 24H-mitoxantrone-0.37                 | 4/39  | $2.80 \times 10^{-4}$ | $2.71 \times 10^{-3}$ |
| LJP006 SKBR3 3H-mitoxantrone-3.33                 | 4/39  | $2.80 \times 10^{-4}$ | $2.71 \times 10^{-3}$ |
| LJP006 MCF10A 3H-mitoxantrone-0.12                | 4/40  | $3.09 \times 10^{-4}$ | $2.93 \times 10^{-3}$ |
| LJP006 A549 24H-mitoxantrone-0.37                 | 6/112 | $3.14 \times 10^{-4}$ | $2.97 \times 10^{-3}$ |
| LJP006 HCC515 24H-mitoxantrone-3.33               | 7/160 | $3.45 \times 10^{-4}$ | $3.22 \times 10^{-3}$ |
| LJP006 MDAMB231 3H-mitoxantrone-0.37              | 5/74  | $3.46 \times 10^{-4}$ | $3.21 \times 10^{-3}$ |
| LJP006 MCF10A 3H-mitoxantrone-0.37                | 4/42  | $3.74 \times 10^{-4}$ | $3.44 \times 10^{-3}$ |
| LJP005 SKBR3 24H-mitoxantrone-1.11                | 6/117 | $3.97 \times 10^{-4}$ | $3.62 \times 10^{-3}$ |
| LJP006 PC3 24H-mitoxantrone-1.11                  | 6/117 | $3.97 \times 10^{-4}$ | $3.62 \times 10^{-3}$ |
| LJP005 MCF10A 3H-mitoxantrone-1.11                | 4/43  | $4.10 \times 10^{-4}$ | $3.72 \times 10^{-3}$ |
| LJP006 HCC515 24H-mitoxantrone-0.37               | 6/121 | $4.75 \times 10^{-4}$ | $4.20 \times 10^{-3}$ |
| LJP007 HT29 24H-mitoxantrone-10                   | 6/123 | $5.18 \times 10^{-4}$ | $4.53 \times 10^{-3}$ |
| LJP006 MDAMB231 3H-mitoxantrone-3.33              | 4/46  | $5.31 \times 10^{-4}$ | $4.62 \times 10^{-3}$ |
| LJP005 HT29 24H-mitoxantrone-0.37                 | 5/82  | $5.56 \times 10^{-4}$ | $4.82 \times 10^{-3}$ |
| LJP005 MCF7 24H-mitoxantrone-0.37                 | 5/82  | $5.56 \times 10^{-4}$ | $4.82 \times 10^{-3}$ |
| LJP005 A549 24H-mitoxantrone-10                   | 7/175 | $5.90 \times 10^{-4}$ | $5.03 \times 10^{-3}$ |
| LJP006 HA1E 24H-mitoxantrone-0.04                 | 6/127 | $6.13 \times 10^{-4}$ | $5.22 \times 10^{-3}$ |
| LJP005 HS578T 3H-mitoxantrone-0.37                | 4/49  | $6.77 \times 10^{-4}$ | $5.68 \times 10^{-3}$ |
| CPC020 A375 6H-mitoxantrone dihydrochloride-10.0  | 5/86  | $6.92 \times 10^{-4}$ | $5.79 \times 10^{-3}$ |
| CPC005 HA1E 24H-mitoxantrone dihydrochloride-10.0 | 6/131 | $7.22 \times 10^{-4}$ | $6.02 \times 10^{-3}$ |
| LJP005 MCF7 24H-mitoxantrone-3.33                 | 6/131 | $7.22 \times 10^{-4}$ | $6.01 \times 10^{-3}$ |
| LJP006 A375 24H-mitoxantrone-3.33                 | 5/87  | $7.29 \times 10^{-4}$ | $6.06 \times 10^{-3}$ |
| LJP006 A549 24H-mitoxantrone-10                   | 7/183 | $7.69 \times 10^{-4}$ | $6.28 \times 10^{-3}$ |
| LJP005 SKBR3 3H-mitoxantrone-3.33                 | 4/55  | $1.05 \times 10^{-3}$ | $8.15 \times 10^{-3}$ |
| LJP005 HS578T 24H-mitoxantrone-3.33               | 6/141 | $1.06 \times 10^{-3}$ | $8.20 \times 10^{-3}$ |
| LJP006 HEPG2 24H-mitoxantrone-0.12                | 4/60  | $1.45 \times 10^{-3}$ | $1.06 \times 10^{-2}$ |
| LJP006 HS578T 24H-mitoxantrone-0.12               | 4/60  | $1.45 \times 10^{-3}$ | $1.06 \times 10^{-2}$ |
| CPC005 A375 24H-mitoxantrone dihydrochloride-10.0 | 7/209 | $1.66 \times 10^{-3}$ | $1.18 \times 10^{-2}$ |
| LJP009 MCF7 24H-mitoxantrone-10                   | 4/63  | $1.74 \times 10^{-3}$ | $1.23 \times 10^{-2}$ |
| LJP008 MCF7 24H-mitoxantrone-10                   | 4/63  | $1.74 \times 10^{-3}$ | $1.23 \times 10^{-2}$ |
| LJP006 A375 24H-mitoxantrone-1.11                 | 5/107 | $1.84 \times 10^{-3}$ | $1.29 \times 10^{-2}$ |
| CPC005 PC3 24H-mitoxantrone dihydrochloride-10.0  | 6/158 | $1.89 \times 10^{-3}$ | $1.32 \times 10^{-2}$ |
| LJP005 SKBR3 24H-mitoxantrone-0.04                | 4/65  | $1.96 \times 10^{-3}$ | $1.35 \times 10^{-2}$ |
| LJP006 SKBR3 24H-mitoxantrone-10                  | 5/109 | $2.00 \times 10^{-3}$ | $1.38 \times 10^{-2}$ |
| LJP006 HT29 24H-mitoxantrone-3.33                 | 6/167 | $2.50 \times 10^{-3}$ | $1.66 \times 10^{-2}$ |
| LJP005 BT20 24H-mitoxantrone-10                   | 4/70  | $2.57 \times 10^{-3}$ | $1.70 \times 10^{-2}$ |
| CPD001 PC3 24H-mitoxantrone dihydrochloride-10.0  | 6/169 | $2.65 \times 10^{-3}$ | $1.74 \times 10^{-2}$ |
| LJP005 A549 24H-mitoxantrone-1.11                 | 5/117 | $2.72 \times 10^{-3}$ | $1.78 \times 10^{-2}$ |
| LJP006 LNCAP 24H-mitoxantrone-0.04                | 4/72  | $2.84 \times 10^{-3}$ | $1.85 \times 10^{-2}$ |
| LJP006 HEPG2 24H-mitoxantrone-10                  | 6/172 | $2.90 \times 10^{-3}$ | $1.87 \times 10^{-2}$ |
| LJP006 HME1 3H-mitoxantrone-0.37                  | 3/36  | $3.11 \times 10^{-3}$ | $1.98 \times 10^{-2}$ |

Table S20: (Continued)

|                                                  |       |                       |                       |
|--------------------------------------------------|-------|-----------------------|-----------------------|
| LJP006 SKBR3 24H-mitoxantrone-3.33               | 5/121 | $3.15 \times 10^{-3}$ | $1.99 \times 10^{-2}$ |
| LJP005 HA1E 24H-mitoxantrone-3.33                | 5/125 | $3.62 \times 10^{-3}$ | $2.24 \times 10^{-2}$ |
| LJP009 A375 24H-mitoxantrone-10                  | 4/77  | $3.63 \times 10^{-3}$ | $2.24 \times 10^{-2}$ |
| LJP005 MCF7 3H-mitoxantrone-3.33                 | 4/78  | $3.80 \times 10^{-3}$ | $2.32 \times 10^{-2}$ |
| LJP007 A375 24H-mitoxantrone-10                  | 5/127 | $3.87 \times 10^{-3}$ | $2.35 \times 10^{-2}$ |
| LJP005 HS578T 3H-mitoxantrone-3.33               | 3/39  | $3.92 \times 10^{-3}$ | $2.38 \times 10^{-2}$ |
| LJP008 A549 24H-mitoxantrone-10                  | 5/129 | $4.14 \times 10^{-3}$ | $2.49 \times 10^{-2}$ |
| LJP006 LNCAP 24H-mitoxantrone-1.11               | 5/131 | $4.41 \times 10^{-3}$ | $2.61 \times 10^{-2}$ |
| LJP005 HT29 24H-mitoxantrone-10                  | 5/134 | $4.86 \times 10^{-3}$ | $2.80 \times 10^{-2}$ |
| CPC020 HT29 6H-mitoxantrone dihydrochloride-10.0 | 3/43  | $5.16 \times 10^{-3}$ | $2.94 \times 10^{-2}$ |
| LJP006 MCF7 24H-mitoxantrone-10                  | 4/87  | $5.60 \times 10^{-3}$ | $3.13 \times 10^{-2}$ |
| LJP006 BT20 24H-mitoxantrone-0.12                | 4/88  | $5.83 \times 10^{-3}$ | $3.24 \times 10^{-2}$ |
| LJP006 HS578T 3H-mitoxantrone-10                 | 3/46  | $6.24 \times 10^{-3}$ | $3.40 \times 10^{-2}$ |
| LJP006 MCF10A 3H-mitoxantrone-3.33               | 3/50  | $7.87 \times 10^{-3}$ | $4.09 \times 10^{-2}$ |
| LJP006 MDAMB231 24H-mitoxantrone-0.12            | 3/50  | $7.87 \times 10^{-3}$ | $4.09 \times 10^{-2}$ |
| CPC005 MCF7 6H-mitoxantrone dihydrochloride-10.0 | 4/96  | $7.90 \times 10^{-3}$ | $4.10 \times 10^{-2}$ |
| LJP005 HT29 24H-mitoxantrone-1.11                | 4/96  | $7.90 \times 10^{-3}$ | $4.09 \times 10^{-2}$ |
| LJP005 HS578T 24H-mitoxantrone-0.37              | 5/152 | $8.19 \times 10^{-3}$ | $4.22 \times 10^{-2}$ |
| LJP005 MDAMB231 3H-mitoxantrone-3.33             | 2/17  | $8.29 \times 10^{-3}$ | $4.26 \times 10^{-2}$ |
| LJP006 HT29 24H-mitoxantrone-10                  | 4/98  | $8.49 \times 10^{-3}$ | $4.32 \times 10^{-2}$ |
| LJP006 MCF10A 3H-mitoxantrone-1.11               | 3/52  | $8.77 \times 10^{-3}$ | $4.44 \times 10^{-2}$ |
| LJP005 MCF10A 24H-mitoxantrone-3.33              | 4/100 | $9.10 \times 10^{-3}$ | $4.58 \times 10^{-2}$ |



Table S21: Mitoxantrone significantly affects the expression of the selected 163 genes as evident in the ‘LINCS L1000 Chem Pert down’ category in Enrichr. The last number after the - is dose density.

| Term                                | Overlap | P-value                | Adjusted P-value       |
|-------------------------------------|---------|------------------------|------------------------|
| LINCS L1000 Chem Pert down          |         |                        |                        |
| LJP005 HCC515 24H-mitoxantrone-0.12 | 17/120  | $1.22 \times 10^{-16}$ | $2.02 \times 10^{-13}$ |
| LJP007 HT29 24H-mitoxantrone-10     | 15/123  | $7.94 \times 10^{-14}$ | $3.13 \times 10^{-11}$ |
| LJP005 HEPG2 24H-mitoxantrone-10    | 13/82   | $1.18 \times 10^{-13}$ | $4.40 \times 10^{-11}$ |
| LJP005 SKBR3 24H-mitoxantrone-10    | 12/70   | $4.03 \times 10^{-13}$ | $1.24 \times 10^{-10}$ |
| LJP005 BT20 3H-mitoxantrone-3.33    | 10/40   | $6.72 \times 10^{-13}$ | $1.89 \times 10^{-10}$ |
| LJP008 PC3 24H-mitoxantrone-10      | 15/146  | $1.02 \times 10^{-12}$ | $2.69 \times 10^{-10}$ |
| LJP006 SKBR3 24H-mitoxantrone-3.33  | 14/120  | $1.03 \times 10^{-12}$ | $2.68 \times 10^{-10}$ |
| LJP005 A549 24H-mitoxantrone-3.33   | 16/185  | $2.53 \times 10^{-12}$ | $5.42 \times 10^{-10}$ |
| LJP006 HCC515 24H-mitoxantrone-0.12 | 11/82   | $6.38 \times 10^{-11}$ | $7.36 \times 10^{-9}$  |
| LJP006 HEPG2 24H-mitoxantrone-10    | 11/87   | $1.23 \times 10^{-10}$ | $1.24 \times 10^{-8}$  |
| LJP005 SKBR3 24H-mitoxantrone-3.33  | 12/115  | $1.71 \times 10^{-10}$ | $1.63 \times 10^{-8}$  |
| LJP006 HCC515 24H-mitoxantrone-0.37 | 11/92   | $2.28 \times 10^{-10}$ | $2.08 \times 10^{-8}$  |
| LJP005 SKBR3 3H-mitoxantrone-10     | 9/52    | $3.46 \times 10^{-10}$ | $2.94 \times 10^{-8}$  |
| LJP005 HA1E 24H-mitoxantrone-10     | 11/98   | $4.56 \times 10^{-10}$ | $3.66 \times 10^{-8}$  |
| LJP006 BT20 24H-mitoxantrone-10     | 10/75   | $5.15 \times 10^{-10}$ | $4.03 \times 10^{-8}$  |
| LJP007 A549 24H-mitoxantrone-10     | 7/25    | $8.91 \times 10^{-10}$ | $6.36 \times 10^{-8}$  |
| LJP007 HCC515 24H-mitoxantrone-10   | 10/82   | $1.27 \times 10^{-9}$  | $8.48 \times 10^{-8}$  |
| LJP005 HT29 24H-mitoxantrone-10     | 11/110  | $1.60 \times 10^{-9}$  | $1.03 \times 10^{-7}$  |
| LJP005 HCC515 24H-mitoxantrone-10   | 11/111  | $1.76 \times 10^{-9}$  | $1.11 \times 10^{-7}$  |
| LJP006 HS578T 24H-mitoxantrone-10   | 10/86   | $2.04 \times 10^{-9}$  | $1.27 \times 10^{-7}$  |
| LJP005 PC3 24H-mitoxantrone-10      | 11/114  | $2.34 \times 10^{-9}$  | $1.43 \times 10^{-7}$  |
| LJP006 HS578T 24H-mitoxantrone-3.33 | 11/115  | $2.57 \times 10^{-9}$  | $1.54 \times 10^{-7}$  |
| LJP009 A375 24H-mitoxantrone-10     | 10/93   | $4.43 \times 10^{-9}$  | $2.44 \times 10^{-7}$  |
| LJP006 HCC515 24H-mitoxantrone-10   | 10/94   | $4.92 \times 10^{-9}$  | $2.65 \times 10^{-7}$  |
| LJP006 HS578T 3H-mitoxantrone-1.11  | 9/74    | $8.93 \times 10^{-9}$  | $4.42 \times 10^{-7}$  |
| LJP009 HCC515 24H-mitoxantrone-10   | 9/75    | $1.01 \times 10^{-8}$  | $4.87 \times 10^{-7}$  |
| LJP009 HT29 24H-mitoxantrone-10     | 10/104  | $1.32 \times 10^{-8}$  | $6.08 \times 10^{-7}$  |
| LJP008 HCC515 24H-mitoxantrone-10   | 9/78    | $1.43 \times 10^{-8}$  | $6.50 \times 10^{-7}$  |
| LJP009 HEPG2 24H-mitoxantrone-10    | 10/108  | $1.91 \times 10^{-8}$  | $8.23 \times 10^{-7}$  |
| LJP006 MCF10A 3H-mitoxantrone-10    | 9/81    | $2.01 \times 10^{-8}$  | $8.50 \times 10^{-7}$  |
| LJP006 MCF7 24H-mitoxantrone-10     | 8/61    | $3.34 \times 10^{-8}$  | $1.31 \times 10^{-6}$  |
| LJP005 HS578T 24H-mitoxantrone-0.37 | 11/152  | $4.83 \times 10^{-8}$  | $1.82 \times 10^{-6}$  |
| LJP008 HEPG2 24H-mitoxantrone-10    | 9/90    | $5.11 \times 10^{-8}$  | $1.91 \times 10^{-6}$  |
| LJP006 HS578T 24H-mitoxantrone-0.37 | 10/122  | $6.17 \times 10^{-8}$  | $2.24 \times 10^{-6}$  |
| LJP008 A549 24H-mitoxantrone-10     | 9/93    | $6.81 \times 10^{-8}$  | $2.42 \times 10^{-6}$  |
| LJP005 HS578T 3H-mitoxantrone-3.33  | 9/93    | $6.81 \times 10^{-8}$  | $2.42 \times 10^{-6}$  |
| LJP005 HCC515 24H-mitoxantrone-3.33 | 9/96    | $8.99 \times 10^{-8}$  | $3.05 \times 10^{-6}$  |
| LJP005 BT20 24H-mitoxantrone-10     | 9/101   | $1.40 \times 10^{-7}$  | $4.48 \times 10^{-6}$  |
| LJP005 HCC515 24H-mitoxantrone-1.11 | 9/101   | $1.40 \times 10^{-7}$  | $4.47 \times 10^{-6}$  |
| LJP006 A375 24H-mitoxantrone-10     | 10/134  | $1.50 \times 10^{-7}$  | $4.75 \times 10^{-6}$  |
| LJP005 HS578T 3H-mitoxantrone-1.11  | 9/102   | $1.52 \times 10^{-7}$  | $4.81 \times 10^{-6}$  |
| LJP005 MCF7 24H-mitoxantrone-10     | 7/50    | $1.56 \times 10^{-7}$  | $4.92 \times 10^{-6}$  |
| LJP008 HA1E 24H-mitoxantrone-10     | 9/103   | $1.66 \times 10^{-7}$  | $5.19 \times 10^{-6}$  |
| LJP006 SKBR3 24H-mitoxantrone-10    | 8/78    | $2.37 \times 10^{-7}$  | $6.96 \times 10^{-6}$  |
| LJP006 LNCAP 3H-mitoxantrone-3.33   | 7/54    | $2.69 \times 10^{-7}$  | $7.74 \times 10^{-6}$  |
| LJP005 HA1E 24H-mitoxantrone-0.37   | 9/109   | $2.70 \times 10^{-7}$  | $7.75 \times 10^{-6}$  |
| LJP005 A549 24H-mitoxantrone-10     | 10/143  | $2.76 \times 10^{-7}$  | $7.88 \times 10^{-6}$  |
| LJP006 HT29 24H-mitoxantrone-10     | 8/80    | $2.89 \times 10^{-7}$  | $8.18 \times 10^{-6}$  |
| LJP006 PC3 24H-mitoxantrone-10      | 9/110   | $2.92 \times 10^{-7}$  | $8.24 \times 10^{-6}$  |
| LJP005 BT20 3H-mitoxantrone-1.11    | 7/55    | $3.07 \times 10^{-7}$  | $8.58 \times 10^{-6}$  |
| LJP006 HA1E 24H-mitoxantrone-1.11   | 9/113   | $3.68 \times 10^{-7}$  | $9.95 \times 10^{-6}$  |
| LJP005 HS578T 24H-mitoxantrone-0.12 | 8/85    | $4.63 \times 10^{-7}$  | $1.21 \times 10^{-5}$  |
| LJP006 HS578T 3H-mitoxantrone-3.33  | 8/92    | $8.53 \times 10^{-7}$  | $2.02 \times 10^{-5}$  |
| LJP005 MCF10A 3H-mitoxantrone-1.11  | 7/65    | $9.82 \times 10^{-7}$  | $2.28 \times 10^{-5}$  |

Table S21: (Continued)

|                                       |        |                       |                       |
|---------------------------------------|--------|-----------------------|-----------------------|
| LJP006 LNCAP 24H-mitoxantrone-1.11    | 11/207 | $1.09 \times 10^{-6}$ | $2.49 \times 10^{-5}$ |
| LJP006 LNCAP 24H-mitoxantrone-10      | 8/95   | $1.09 \times 10^{-6}$ | $2.50 \times 10^{-5}$ |
| LJP006 SKBR3 3H-mitoxantrone-10       | 7/70   | $1.63 \times 10^{-6}$ | $3.50 \times 10^{-5}$ |
| LJP006 HME1 24H-mitoxantrone-0.37     | 6/46   | $1.91 \times 10^{-6}$ | $3.97 \times 10^{-5}$ |
| LJP005 MDAMB231 3H-mitoxantrone-3.33  | 7/72   | $1.98 \times 10^{-6}$ | $4.10 \times 10^{-5}$ |
| LJP006 MCF10A 3H-mitoxantrone-0.12    | 6/48   | $2.47 \times 10^{-6}$ | $4.92 \times 10^{-5}$ |
| LJP005 HA1E 24H-mitoxantrone-0.12     | 7/77   | $3.13 \times 10^{-6}$ | $6.01 \times 10^{-5}$ |
| LJP006 HCC515 24H-mitoxantrone-3.33   | 6/51   | $3.55 \times 10^{-6}$ | $6.66 \times 10^{-5}$ |
| LJP006 MCF7 3H-mitoxantrone-10        | 6/52   | $3.99 \times 10^{-6}$ | $7.40 \times 10^{-5}$ |
| LJP006 PC3 24H-mitoxantrone-3.33      | 9/152  | $4.41 \times 10^{-6}$ | $8.06 \times 10^{-5}$ |
| LJP009 MCF7 24H-mitoxantrone-10       | 8/117  | $5.26 \times 10^{-6}$ | $9.40 \times 10^{-5}$ |
| LJP005 HA1E 24H-mitoxantrone-3.33     | 7/86   | $6.57 \times 10^{-6}$ | $1.13 \times 10^{-4}$ |
| LJP005 A375 24H-mitoxantrone-10       | 8/121  | $6.76 \times 10^{-6}$ | $1.16 \times 10^{-4}$ |
| LJP008 MCF7 24H-mitoxantrone-10       | 6/57   | $6.88 \times 10^{-6}$ | $1.18 \times 10^{-4}$ |
| LJP009 PC3 24H-mitoxantrone-10        | 9/163  | $7.79 \times 10^{-6}$ | $1.30 \times 10^{-4}$ |
| LJP006 MDAMB231 24H-mitoxantrone-3.33 | 8/124  | $8.10 \times 10^{-6}$ | $1.35 \times 10^{-4}$ |
| LJP007 A375 24H-mitoxantrone-10       | 7/89   | $8.26 \times 10^{-6}$ | $1.37 \times 10^{-4}$ |
| LJP006 A375 24H-mitoxantrone-3.33     | 6/59   | $8.42 \times 10^{-6}$ | $1.40 \times 10^{-4}$ |
| LJP005 HT29 24H-mitoxantrone-0.37     | 6/60   | $9.30 \times 10^{-6}$ | $1.52 \times 10^{-4}$ |
| LJP006 MDAMB231 3H-mitoxantrone-3.33  | 8/127  | $9.66 \times 10^{-6}$ | $1.57 \times 10^{-4}$ |
| LJP005 HS578T 24H-mitoxantrone-1.11   | 7/92   | $1.03 \times 10^{-5}$ | $1.66 \times 10^{-4}$ |
| LJP006 HME1 24H-mitoxantrone-1.11     | 6/62   | $1.13 \times 10^{-5}$ | $1.79 \times 10^{-4}$ |
| LJP005 HEPG2 24H-mitoxantrone-3.33    | 8/132  | $1.28 \times 10^{-5}$ | $2.00 \times 10^{-4}$ |
| LJP006 HA1E 24H-mitoxantrone-0.12     | 8/133  | $1.35 \times 10^{-5}$ | $2.11 \times 10^{-4}$ |
| LJP006 BT20 24H-mitoxantrone-0.12     | 6/64   | $1.36 \times 10^{-5}$ | $2.11 \times 10^{-4}$ |
| LJP005 MCF10A 3H-mitoxantrone-10      | 6/65   | $1.48 \times 10^{-5}$ | $2.27 \times 10^{-4}$ |
| LJP005 HT29 24H-mitoxantrone-1.11     | 7/98   | $1.56 \times 10^{-5}$ | $2.36 \times 10^{-4}$ |
| LJP006 HA1E 24H-mitoxantrone-10       | 5/40   | $1.77 \times 10^{-5}$ | $2.63 \times 10^{-4}$ |
| LJP006 MCF7 3H-mitoxantrone-1.11      | 5/40   | $1.77 \times 10^{-5}$ | $2.63 \times 10^{-4}$ |
| LJP005 A549 24H-mitoxantrone-1.11     | 9/183  | $1.97 \times 10^{-5}$ | $2.88 \times 10^{-4}$ |
| LJP006 MCF10A 24H-mitoxantrone-0.12   | 7/103  | $2.16 \times 10^{-5}$ | $3.12 \times 10^{-4}$ |
| LJP005 MDAMB231 3H-mitoxantrone-1.11  | 6/72   | $2.68 \times 10^{-5}$ | $3.77 \times 10^{-4}$ |
| LJP006 MDAMB231 3H-mitoxantrone-1.11  | 6/73   | $2.90 \times 10^{-5}$ | $4.01 \times 10^{-4}$ |
| LJP005 MDAMB231 3H-mitoxantrone-10    | 6/75   | $3.38 \times 10^{-5}$ | $4.59 \times 10^{-4}$ |
| LJP005 SKBR3 24H-mitoxantrone-1.11    | 6/77   | $3.93 \times 10^{-5}$ | $5.20 \times 10^{-4}$ |
| LJP006 MDAMB231 3H-mitoxantrone-10    | 7/114  | $4.16 \times 10^{-5}$ | $5.43 \times 10^{-4}$ |
| LJP006 HEPG2 24H-mitoxantrone-3.33    | 7/117  | $4.91 \times 10^{-5}$ | $6.23 \times 10^{-4}$ |
| LJP006 BT20 24H-mitoxantrone-1.11     | 6/81   | $5.24 \times 10^{-5}$ | $6.61 \times 10^{-4}$ |
| LJP006 MCF10A 3H-mitoxantrone-3.33    | 6/82   | $5.61 \times 10^{-5}$ | $6.99 \times 10^{-4}$ |
| LJP006 HS578T 24H-mitoxantrone-1.11   | 6/84   | $6.43 \times 10^{-5}$ | $7.85 \times 10^{-4}$ |
| LJP005 HCC515 24H-mitoxantrone-0.37   | 6/85   | $6.87 \times 10^{-5}$ | $8.30 \times 10^{-4}$ |
| LJP006 A549 24H-mitoxantrone-3.33     | 8/167  | $6.93 \times 10^{-5}$ | $8.34 \times 10^{-4}$ |
| LJP007 HA1E 24H-mitoxantrone-10       | 6/87   | $7.83 \times 10^{-5}$ | $9.17 \times 10^{-4}$ |
| LJP005 HA1E 24H-mitoxantrone-0.04     | 5/55   | $8.46 \times 10^{-5}$ | $9.85 \times 10^{-4}$ |
| LJP005 HS578T 3H-mitoxantrone-10      | 5/55   | $8.46 \times 10^{-5}$ | $9.84 \times 10^{-4}$ |
| LJP006 LNCAP 3H-mitoxantrone-10       | 5/57   | $1.01 \times 10^{-4}$ | $1.13 \times 10^{-3}$ |
| LJP005 A375 24H-mitoxantrone-3.33     | 6/92   | $1.07 \times 10^{-4}$ | $1.19 \times 10^{-3}$ |
| LJP006 MDAMB231 24H-mitoxantrone-10   | 4/31   | $1.13 \times 10^{-4}$ | $1.24 \times 10^{-3}$ |
| LJP005 MCF7 3H-mitoxantrone-10        | 6/93   | $1.13 \times 10^{-4}$ | $1.25 \times 10^{-3}$ |
| LJP006 MDAMB231 24H-mitoxantrone-0.37 | 5/59   | $1.19 \times 10^{-4}$ | $1.30 \times 10^{-3}$ |
| LJP005 PC3 24H-mitoxantrone-1.11      | 6/94   | $1.20 \times 10^{-4}$ | $1.32 \times 10^{-3}$ |
| LJP006 A549 24H-mitoxantrone-10       | 6/94   | $1.20 \times 10^{-4}$ | $1.31 \times 10^{-3}$ |
| LJP005 HS578T 24H-mitoxantrone-3.33   | 6/96   | $1.35 \times 10^{-4}$ | $1.46 \times 10^{-3}$ |
| LJP005 BT20 3H-mitoxantrone-10        | 5/61   | $1.39 \times 10^{-4}$ | $1.49 \times 10^{-3}$ |
| LJP006 HME1 24H-mitoxantrone-10       | 5/61   | $1.39 \times 10^{-4}$ | $1.49 \times 10^{-3}$ |
| LJP006 HA1E 24H-mitoxantrone-3.33     | 6/97   | $1.43 \times 10^{-4}$ | $1.53 \times 10^{-3}$ |
| LJP006 HME1 24H-mitoxantrone-3.33     | 5/63   | $1.62 \times 10^{-4}$ | $1.70 \times 10^{-3}$ |

Table S21: (Continued)

|                                                  |       |                       |                       |
|--------------------------------------------------|-------|-----------------------|-----------------------|
| LJP006 MCF10A 3H-mitoxantrone-1.11               | 5/63  | $1.62 \times 10^{-4}$ | $1.70 \times 10^{-3}$ |
| LJP007 HEPG2 24H-mitoxantrone-10                 | 5/64  | $1.75 \times 10^{-4}$ | $1.80 \times 10^{-3}$ |
| LJP006 LNCAP 24H-mitoxantrone-3.33               | 6/101 | $1.79 \times 10^{-4}$ | $1.84 \times 10^{-3}$ |
| LJP006 LNCAP 24H-mitoxantrone-0.37               | 8/195 | $2.03 \times 10^{-4}$ | $2.04 \times 10^{-3}$ |
| LJP005 MDAMB231 3H-mitoxantrone-0.04             | 4/37  | $2.28 \times 10^{-4}$ | $2.27 \times 10^{-3}$ |
| LJP006 HT29 24H-mitoxantrone-3.33                | 7/150 | $2.33 \times 10^{-4}$ | $2.31 \times 10^{-3}$ |
| LJP005 MCF10A 3H-mitoxantrone-3.33               | 4/38  | $2.53 \times 10^{-4}$ | $2.48 \times 10^{-3}$ |
| LJP006 HEPG2 24H-mitoxantrone-1.11               | 6/108 | $2.58 \times 10^{-4}$ | $2.51 \times 10^{-3}$ |
| LJP006 HS578T 3H-mitoxantrone-10                 | 5/71  | $2.85 \times 10^{-4}$ | $2.73 \times 10^{-3}$ |
| LJP005 MDAMB231 24H-mitoxantrone-10              | 3/17  | $3.32 \times 10^{-4}$ | $3.11 \times 10^{-3}$ |
| LJP005 PC3 24H-mitoxantrone-0.12                 | 4/41  | $3.40 \times 10^{-4}$ | $3.17 \times 10^{-3}$ |
| LJP005 PC3 24H-mitoxantrone-3.33                 | 6/116 | $3.79 \times 10^{-4}$ | $3.45 \times 10^{-3}$ |
| LJP007 MCF7 24H-mitoxantrone-10                  | 6/120 | $4.54 \times 10^{-4}$ | $4.02 \times 10^{-3}$ |
| LJP006 MCF7 24H-mitoxantrone-1.11                | 6/121 | $4.75 \times 10^{-4}$ | $4.18 \times 10^{-3}$ |
| LJP006 HME1 3H-mitoxantrone-3.33                 | 5/81  | $5.26 \times 10^{-4}$ | $4.57 \times 10^{-3}$ |
| LJP005 HA1E 24H-mitoxantrone-1.11                | 5/82  | $5.56 \times 10^{-4}$ | $4.78 \times 10^{-3}$ |
| LJP005 HT29 24H-mitoxantrone-3.33                | 7/177 | $6.32 \times 10^{-4}$ | $5.30 \times 10^{-3}$ |
| LJP006 A549 24H-mitoxantrone-1.11                | 6/130 | $6.93 \times 10^{-4}$ | $5.73 \times 10^{-3}$ |
| LJP006 MCF7 3H-mitoxantrone-3.33                 | 4/50  | $7.31 \times 10^{-4}$ | $5.98 \times 10^{-3}$ |
| LJP008 HT29 24H-mitoxantrone-10                  | 4/55  | $1.05 \times 10^{-3}$ | $8.16 \times 10^{-3}$ |
| LJP006 HS578T 24H-mitoxantrone-0.12              | 4/56  | $1.12 \times 10^{-3}$ | $8.61 \times 10^{-3}$ |
| LJP005 MDAMB231 24H-mitoxantrone-3.33            | 3/28  | $1.50 \times 10^{-3}$ | $1.10 \times 10^{-2}$ |
| LJP006 SKBR3 3H-mitoxantrone-3.33                | 4/61  | $1.55 \times 10^{-3}$ | $1.12 \times 10^{-2}$ |
| LJP008 A375 24H-mitoxantrone-10                  | 5/103 | $1.56 \times 10^{-3}$ | $1.13 \times 10^{-2}$ |
| LJP005 MCF10A 24H-mitoxantrone-0.04              | 4/62  | $1.64 \times 10^{-3}$ | $1.18 \times 10^{-2}$ |
| LJP005 BT20 24H-mitoxantrone-3.33                | 4/64  | $1.85 \times 10^{-3}$ | $1.30 \times 10^{-2}$ |
| LJP006 HME1 3H-mitoxantrone-10                   | 4/64  | $1.85 \times 10^{-3}$ | $1.30 \times 10^{-2}$ |
| LJP006 PC3 24H-mitoxantrone-0.37                 | 4/64  | $1.85 \times 10^{-3}$ | $1.30 \times 10^{-2}$ |
| LJP006 MDAMB231 24H-mitoxantrone-0.12            | 3/31  | $2.02 \times 10^{-3}$ | $1.40 \times 10^{-2}$ |
| LJP005 MCF7 3H-mitoxantrone-1.11                 | 4/66  | $2.07 \times 10^{-3}$ | $1.43 \times 10^{-2}$ |
| LJP006 HA1E 24H-mitoxantrone-0.37                | 5/111 | $2.16 \times 10^{-3}$ | $1.49 \times 10^{-2}$ |
| LJP006 BT20 24H-mitoxantrone-0.37                | 4/69  | $2.44 \times 10^{-3}$ | $1.63 \times 10^{-2}$ |
| LJP005 SKBR3 24H-mitoxantrone-0.37               | 4/72  | $2.84 \times 10^{-3}$ | $1.86 \times 10^{-2}$ |
| LJP005 HS578T 3H-mitoxantrone-0.37               | 3/36  | $3.11 \times 10^{-3}$ | $2.01 \times 10^{-2}$ |
| LJP006 HEPG2 24H-mitoxantrone-0.37               | 5/125 | $3.62 \times 10^{-3}$ | $2.27 \times 10^{-2}$ |
| LJP006 A549 24H-mitoxantrone-0.12                | 5/129 | $4.14 \times 10^{-3}$ | $2.52 \times 10^{-2}$ |
| LJP006 MCF7 24H-mitoxantrone-3.33                | 4/81  | $4.35 \times 10^{-3}$ | $2.61 \times 10^{-2}$ |
| CPC020 HT29 6H-mitoxantrone dihydrochloride-10.0 | 6/190 | $4.71 \times 10^{-3}$ | $2.80 \times 10^{-2}$ |
| LJP005 A375 24H-mitoxantrone-1.11                | 4/83  | $4.74 \times 10^{-3}$ | $2.81 \times 10^{-2}$ |
| LJP006 HME1 3H-mitoxantrone-1.11                 | 3/43  | $5.16 \times 10^{-3}$ | $2.99 \times 10^{-2}$ |
| LJP006 HT29 24H-mitoxantrone-0.37                | 3/43  | $5.16 \times 10^{-3}$ | $2.99 \times 10^{-2}$ |
| LJP006 BT20 24H-mitoxantrone-3.33                | 4/86  | $5.38 \times 10^{-3}$ | $3.10 \times 10^{-2}$ |
| LJP006 LNCAP 3H-mitoxantrone-1.11                | 3/46  | $6.24 \times 10^{-3}$ | $3.47 \times 10^{-2}$ |
| LJP006 HCC515 24H-mitoxantrone-1.11              | 4/91  | $6.56 \times 10^{-3}$ | $3.62 \times 10^{-2}$ |
| LJP006 MDAMB231 3H-mitoxantrone-0.37             | 3/47  | $6.63 \times 10^{-3}$ | $3.64 \times 10^{-2}$ |
| LJP006 SKBR3 3H-mitoxantrone-1.11                | 3/47  | $6.63 \times 10^{-3}$ | $3.64 \times 10^{-2}$ |
| CPC020 PC3 6H-mitoxantrone dihydrochloride-10.0  | 6/205 | $6.77 \times 10^{-3}$ | $3.71 \times 10^{-2}$ |
| LJP005 BT20 24H-mitoxantrone-1.11                | 3/48  | $7.03 \times 10^{-3}$ | $3.84 \times 10^{-2}$ |
| LJP009 A549 24H-mitoxantrone-10                  | 3/48  | $7.03 \times 10^{-3}$ | $3.83 \times 10^{-2}$ |
| LJP005 SKBR3 3H-mitoxantrone-3.33                | 3/48  | $7.03 \times 10^{-3}$ | $3.83 \times 10^{-2}$ |
| LJP006 SKBR3 24H-mitoxantrone-1.11               | 4/94  | $7.35 \times 10^{-3}$ | $3.97 \times 10^{-2}$ |
| LJP005 SKBR3 24H-mitoxantrone-0.04               | 3/49  | $7.44 \times 10^{-3}$ | $4.00 \times 10^{-2}$ |
| LJP005 MCF10A 24H-mitoxantrone-1.11              | 5/149 | $7.55 \times 10^{-3}$ | $4.04 \times 10^{-2}$ |
| LJP007 PC3 24H-mitoxantrone-10                   | 4/97  | $8.19 \times 10^{-3}$ | $4.33 \times 10^{-2}$ |

Table S22: QL-XII-47 significantly affects the expression of the selected 163 genes as evident in the ‘LINCS L1000 Chem Pert up’ category in Enrichr. The last number after the - is dose density.

| Term                               | Overlap | P-value                | Adjusted P-value       |
|------------------------------------|---------|------------------------|------------------------|
| LINCS L1000 Chem Pert up           |         |                        |                        |
| LJP006 MCF7 24H-QL-XII-47-3.33     | 18/163  | $1.37 \times 10^{-15}$ | $1.13 \times 10^{-12}$ |
| LJP006 A549 24H-QL-XII-47-10       | 19/219  | $1.89 \times 10^{-14}$ | $9.96 \times 10^{-12}$ |
| LJP006 HME1 24H-QL-XII-47-1.11     | 15/153  | $2.04 \times 10^{-12}$ | $5.07 \times 10^{-10}$ |
| LJP006 MCF7 24H-QL-XII-47-1.11     | 14/131  | $3.49 \times 10^{-12}$ | $7.65 \times 10^{-10}$ |
| LJP006 LNCAP 24H-QL-XII-47-0.37    | 13/122  | $2.20 \times 10^{-11}$ | $3.32 \times 10^{-9}$  |
| LJP006 SKBR3 24H-QL-XII-47-0.37    | 12/99   | $2.86 \times 10^{-11}$ | $4.12 \times 10^{-9}$  |
| LJP006 MCF10A 3H-QL-XII-47-10      | 12/103  | $4.60 \times 10^{-11}$ | $6.10 \times 10^{-9}$  |
| LJP006 HME1 24H-QL-XII-47-0.37     | 12/106  | $6.49 \times 10^{-11}$ | $7.87 \times 10^{-9}$  |
| LJP006 HCC515 24H-QL-XII-47-10     | 13/143  | $1.66 \times 10^{-10}$ | $1.68 \times 10^{-8}$  |
| LJP006 A375 24H-QL-XII-47-0.12     | 8/38    | $6.51 \times 10^{-10}$ | $5.27 \times 10^{-8}$  |
| LJP006 BT20 24H-QL-XII-47-0.04     | 9/56    | $6.93 \times 10^{-10}$ | $5.58 \times 10^{-8}$  |
| LJP006 HT29 24H-QL-XII-47-10       | 11/107  | $1.18 \times 10^{-9}$  | $8.48 \times 10^{-8}$  |
| LJP006 MCF7 24H-QL-XII-47-10       | 14/204  | $1.34 \times 10^{-9}$  | $9.34 \times 10^{-8}$  |
| LJP006 MDAMB231 3H-QL-XII-47-10    | 11/130  | $9.46 \times 10^{-9}$  | $4.91 \times 10^{-7}$  |
| LJP006 MCF7 24H-QL-XII-47-0.37     | 10/103  | $1.21 \times 10^{-8}$  | $6.00 \times 10^{-7}$  |
| LJP006 HEPG2 24H-QL-XII-47-1.11    | 11/134  | $1.30 \times 10^{-8}$  | $6.37 \times 10^{-7}$  |
| LJP006 HME1 3H-QL-XII-47-3.33      | 11/135  | $1.41 \times 10^{-8}$  | $6.81 \times 10^{-7}$  |
| LJP006 BT20 24H-QL-XII-47-0.12     | 12/172  | $1.76 \times 10^{-8}$  | $8.21 \times 10^{-7}$  |
| LJP006 A549 24H-QL-XII-47-3.33     | 7/49    | $1.35 \times 10^{-7}$  | $4.65 \times 10^{-6}$  |
| LJP006 HME1 3H-QL-XII-47-1.11      | 10/135  | $1.61 \times 10^{-7}$  | $5.37 \times 10^{-6}$  |
| LJP006 A375 24H-QL-XII-47-3.33     | 11/172  | $1.71 \times 10^{-7}$  | $5.64 \times 10^{-6}$  |
| LJP006 MCF7 3H-QL-XII-47-10        | 9/111   | $3.16 \times 10^{-7}$  | $9.38 \times 10^{-6}$  |
| LJP006 LNCAP 24H-QL-XII-47-1.11    | 12/227  | $3.67 \times 10^{-7}$  | $1.07 \times 10^{-5}$  |
| LJP006 HME1 3H-QL-XII-47-0.37      | 9/113   | $3.68 \times 10^{-7}$  | $1.07 \times 10^{-5}$  |
| LJP006 HEPG2 24H-QL-XII-47-0.12    | 6/37    | $5.04 \times 10^{-7}$  | $1.39 \times 10^{-5}$  |
| LJP006 MCF7 3H-QL-XII-47-3.33      | 8/86    | $5.07 \times 10^{-7}$  | $1.39 \times 10^{-5}$  |
| LJP006 HEPG2 24H-QL-XII-47-3.33    | 9/120   | $6.14 \times 10^{-7}$  | $1.65 \times 10^{-5}$  |
| LJP006 MCF10A 24H-QL-XII-47-3.33   | 9/121   | $6.59 \times 10^{-7}$  | $1.75 \times 10^{-5}$  |
| LJP006 MCF7 3H-QL-XII-47-1.11      | 7/62    | $7.08 \times 10^{-7}$  | $1.86 \times 10^{-5}$  |
| LJP006 MDAMB231 3H-QL-XII-47-0.37  | 7/64    | $8.83 \times 10^{-7}$  | $2.23 \times 10^{-5}$  |
| LJP006 MDAMB231 3H-QL-XII-47-1.11  | 8/99    | $1.50 \times 10^{-6}$  | $3.44 \times 10^{-5}$  |
| LJP006 BT20 3H-QL-XII-47-1.11      | 7/71    | $1.80 \times 10^{-6}$  | $4.02 \times 10^{-5}$  |
| LJP006 HT29 24H-QL-XII-47-0.12     | 5/27    | $2.36 \times 10^{-6}$  | $5.04 \times 10^{-5}$  |
| LJP006 SKBR3 24H-QL-XII-47-10      | 10/191  | $3.88 \times 10^{-6}$  | $7.56 \times 10^{-5}$  |
| LJP006 BT20 3H-QL-XII-47-0.12      | 4/16    | $7.17 \times 10^{-6}$  | $1.27 \times 10^{-4}$  |
| LJP006 BT20 3H-QL-XII-47-3.33      | 6/59    | $8.42 \times 10^{-6}$  | $1.44 \times 10^{-4}$  |
| LJP006 MDAMB231 3H-QL-XII-47-3.33  | 8/127   | $9.66 \times 10^{-6}$  | $1.61 \times 10^{-4}$  |
| LJP006 BT20 3H-QL-XII-47-0.37      | 6/64    | $1.36 \times 10^{-5}$  | $2.14 \times 10^{-4}$  |
| LJP006 SKBR3 3H-QL-XII-47-10       | 6/66    | $1.62 \times 10^{-5}$  | $2.47 \times 10^{-4}$  |
| LJP006 HME1 24H-QL-XII-47-3.33     | 8/146   | $2.66 \times 10^{-5}$  | $3.79 \times 10^{-4}$  |
| LJP006 MCF10A 3H-QL-XII-47-3.33    | 6/76    | $3.65 \times 10^{-5}$  | $4.95 \times 10^{-4}$  |
| LJP006 BT20 3H-QL-XII-47-0.04      | 4/24    | $3.98 \times 10^{-5}$  | $5.33 \times 10^{-4}$  |
| LJP006 LNCAP 24H-QL-XII-47-3.33    | 9/203   | $4.45 \times 10^{-5}$  | $5.87 \times 10^{-4}$  |
| LJP006 SKBR3 24H-QL-XII-47-3.33    | 9/203   | $4.45 \times 10^{-5}$  | $5.87 \times 10^{-4}$  |
| LJP006 MCF10A 24H-QL-XII-47-10     | 8/158   | $4.68 \times 10^{-5}$  | $6.12 \times 10^{-4}$  |
| LJP006 SKBR3 24H-QL-XII-47-1.11    | 8/163   | $5.84 \times 10^{-5}$  | $7.38 \times 10^{-4}$  |
| LJP006 HME1 3H-QL-XII-47-0.12      | 5/52    | $6.45 \times 10^{-5}$  | $7.91 \times 10^{-4}$  |
| LJP006 MDAMB231 24H-QL-XII-47-1.11 | 4/28    | $7.47 \times 10^{-5}$  | $8.99 \times 10^{-4}$  |
| LJP006 SKBR3 3H-QL-XII-47-3.33     | 6/92    | $1.07 \times 10^{-4}$  | $1.21 \times 10^{-3}$  |
| LJP006 BT20 24H-QL-XII-47-0.37     | 8/180   | $1.17 \times 10^{-4}$  | $1.30 \times 10^{-3}$  |
| LJP006 HEPG2 24H-QL-XII-47-10      | 6/95    | $1.28 \times 10^{-4}$  | $1.41 \times 10^{-3}$  |
| LJP006 SKBR3 3H-QL-XII-47-1.11     | 6/95    | $1.28 \times 10^{-4}$  | $1.41 \times 10^{-3}$  |
| LJP006 HS578T 24H-QL-XII-47-10     | 9/233   | $1.28 \times 10^{-4}$  | $1.40 \times 10^{-3}$  |
| LJP006 MCF7 3H-QL-XII-47-0.04      | 4/33    | $1.45 \times 10^{-4}$  | $1.56 \times 10^{-3}$  |

Table S22: (Continued)

|                                    |       |                       |                       |
|------------------------------------|-------|-----------------------|-----------------------|
| LJP006 A375 24H-QL-XII-47-1.11     | 6/103 | $1.99 \times 10^{-4}$ | $2.03 \times 10^{-3}$ |
| LJP006 MCF7 24H-QL-XII-47-0.12     | 4/36  | $2.04 \times 10^{-4}$ | $2.07 \times 10^{-3}$ |
| LJP006 MCF7 3H-QL-XII-47-0.37      | 4/37  | $2.28 \times 10^{-4}$ | $2.27 \times 10^{-3}$ |
| LJP006 LNCAP 24H-QL-XII-47-0.12    | 5/83  | $5.88 \times 10^{-4}$ | $5.02 \times 10^{-3}$ |
| LJP006 HS578T 3H-QL-XII-47-1.11    | 4/48  | $6.26 \times 10^{-4}$ | $5.30 \times 10^{-3}$ |
| LJP006 A375 24H-QL-XII-47-10       | 6/131 | $7.22 \times 10^{-4}$ | $6.01 \times 10^{-3}$ |
| LJP006 LNCAP 3H-QL-XII-47-1.11     | 4/51  | $7.89 \times 10^{-4}$ | $6.42 \times 10^{-3}$ |
| LJP006 MDAMB231 24H-QL-XII-47-3.33 | 4/51  | $7.89 \times 10^{-4}$ | $6.41 \times 10^{-3}$ |
| LJP006 BT20 24H-QL-XII-47-10       | 7/199 | $1.25 \times 10^{-3}$ | $9.39 \times 10^{-3}$ |
| LJP006 HS578T 3H-QL-XII-47-3.33    | 4/59  | $1.37 \times 10^{-3}$ | $1.00 \times 10^{-2}$ |
| LJP006 LNCAP 24H-QL-XII-47-10      | 7/212 | $1.80 \times 10^{-3}$ | $1.26 \times 10^{-2}$ |
| LJP006 LNCAP 3H-QL-XII-47-3.33     | 4/66  | $2.07 \times 10^{-3}$ | $1.41 \times 10^{-2}$ |
| LJP006 A549 24H-QL-XII-47-0.37     | 3/35  | $2.87 \times 10^{-3}$ | $1.85 \times 10^{-2}$ |
| LJP006 LNCAP 3H-QL-XII-47-10       | 4/78  | $3.80 \times 10^{-3}$ | $2.32 \times 10^{-2}$ |
| LJP006 BT20 24H-QL-XII-47-1.11     | 6/195 | $5.34 \times 10^{-3}$ | $3.02 \times 10^{-2}$ |
| LJP006 HME1 24H-QL-XII-47-0.12     | 3/45  | $5.87 \times 10^{-3}$ | $3.24 \times 10^{-2}$ |
| LJP006 MDAMB231 24H-QL-XII-47-10   | 4/95  | $7.62 \times 10^{-3}$ | $3.99 \times 10^{-2}$ |
| LJP006 SKBR3 24H-QL-XII-47-0.12    | 3/53  | $9.24 \times 10^{-3}$ | $4.62 \times 10^{-2}$ |

Table S23: QL-XII-47 significantly affects the expression of the selected 163 genes as evident in the ‘LINCS L1000 Chem Pert down’ category in Enrichr. The last number after the - is dose density.

| Term                               | Overlap | P-value                | Adjusted P-value       |
|------------------------------------|---------|------------------------|------------------------|
| LINCS L1000 Chem Pert down         |         |                        |                        |
| LJP006 BT20 24H-QL-XII-47-10       | 19/169  | $1.52 \times 10^{-16}$ | $2.29 \times 10^{-13}$ |
| LJP006 SKBR3 24H-QL-XII-47-3.33    | 19/180  | $4.98 \times 10^{-16}$ | $5.69 \times 10^{-13}$ |
| LJP006 HA1E 24H-QL-XII-47-1.11     | 16/178  | $1.40 \times 10^{-12}$ | $3.48 \times 10^{-10}$ |
| LJP006 HS578T 24H-QL-XII-47-10     | 15/184  | $2.95 \times 10^{-11}$ | $3.91 \times 10^{-9}$  |
| LJP006 HA1E 24H-QL-XII-47-0.37     | 12/106  | $6.49 \times 10^{-11}$ | $7.46 \times 10^{-9}$  |
| LJP006 HA1E 24H-QL-XII-47-3.33     | 15/195  | $6.76 \times 10^{-11}$ | $7.72 \times 10^{-9}$  |
| LJP006 LNCAP 24H-QL-XII-47-10      | 13/151  | $3.28 \times 10^{-10}$ | $2.80 \times 10^{-8}$  |
| LJP006 SKBR3 24H-QL-XII-47-1.11    | 14/185  | $3.72 \times 10^{-10}$ | $3.10 \times 10^{-8}$  |
| LJP006 LNCAP 24H-QL-XII-47-3.33    | 13/168  | $1.23 \times 10^{-9}$  | $8.37 \times 10^{-8}$  |
| LJP006 HS578T 24H-QL-XII-47-3.33   | 13/175  | $2.03 \times 10^{-9}$  | $1.27 \times 10^{-7}$  |
| LJP006 BT20 24H-QL-XII-47-0.37     | 12/164  | $1.03 \times 10^{-8}$  | $4.95 \times 10^{-7}$  |
| LJP006 HME1 3H-QL-XII-47-10        | 9/90    | $5.11 \times 10^{-8}$  | $1.91 \times 10^{-6}$  |
| LJP006 BT20 24H-QL-XII-47-3.33     | 11/165  | $1.12 \times 10^{-7}$  | $3.71 \times 10^{-6}$  |
| LJP006 HME1 24H-QL-XII-47-0.12     | 7/52    | $2.06 \times 10^{-7}$  | $6.21 \times 10^{-6}$  |
| LJP006 A549 24H-QL-XII-47-10       | 10/146  | $3.35 \times 10^{-7}$  | $9.26 \times 10^{-6}$  |
| LJP006 MCF7 24H-QL-XII-47-3.33     | 9/116   | $4.60 \times 10^{-7}$  | $1.20 \times 10^{-5}$  |
| LJP006 LNCAP 3H-QL-XII-47-0.37     | 6/43    | $1.27 \times 10^{-6}$  | $2.83 \times 10^{-5}$  |
| LJP006 HA1E 24H-QL-XII-47-10       | 8/98    | $1.38 \times 10^{-6}$  | $3.03 \times 10^{-5}$  |
| LJP006 BT20 24H-QL-XII-47-1.11     | 9/135   | $1.65 \times 10^{-6}$  | $3.53 \times 10^{-5}$  |
| LJP006 HEPG2 24H-QL-XII-47-3.33    | 10/176  | $1.86 \times 10^{-6}$  | $3.89 \times 10^{-5}$  |
| LJP006 MCF10A 24H-QL-XII-47-10     | 8/107   | $2.69 \times 10^{-6}$  | $5.29 \times 10^{-5}$  |
| LJP006 HS578T 24H-QL-XII-47-1.11   | 6/49    | $2.80 \times 10^{-6}$  | $5.47 \times 10^{-5}$  |
| LJP006 HME1 24H-QL-XII-47-1.11     | 9/152   | $4.41 \times 10^{-6}$  | $8.07 \times 10^{-5}$  |
| LJP006 LNCAP 3H-QL-XII-47-1.11     | 5/32    | $5.70 \times 10^{-6}$  | $1.00 \times 10^{-4}$  |
| LJP006 HCC515 24H-QL-XII-47-10     | 8/123   | $7.63 \times 10^{-6}$  | $1.28 \times 10^{-4}$  |
| LJP006 MDAMB231 24H-QL-XII-47-3.33 | 6/60    | $9.30 \times 10^{-6}$  | $1.52 \times 10^{-4}$  |
| LJP006 LNCAP 24H-QL-XII-47-1.11    | 9/170   | $1.09 \times 10^{-5}$  | $1.75 \times 10^{-4}$  |
| LJP006 HEPG2 24H-QL-XII-47-1.11    | 10/219  | $1.29 \times 10^{-5}$  | $2.02 \times 10^{-4}$  |
| LJP006 MCF7 24H-QL-XII-47-0.12     | 5/38    | $1.37 \times 10^{-5}$  | $2.11 \times 10^{-4}$  |
| LJP006 LNCAP 3H-QL-XII-47-10       | 5/41    | $2.00 \times 10^{-5}$  | $2.92 \times 10^{-4}$  |
| LJP006 HME1 24H-QL-XII-47-10       | 7/113   | $3.93 \times 10^{-5}$  | $5.18 \times 10^{-4}$  |
| LJP006 HME1 24H-QL-XII-47-0.37     | 8/157   | $4.48 \times 10^{-5}$  | $5.77 \times 10^{-4}$  |
| LJP006 LNCAP 3H-QL-XII-47-3.33     | 4/27    | $6.45 \times 10^{-5}$  | $7.86 \times 10^{-4}$  |
| LJP006 SKBR3 24H-QL-XII-47-10      | 8/167   | $6.93 \times 10^{-5}$  | $8.34 \times 10^{-4}$  |
| LJP006 HME1 24H-QL-XII-47-3.33     | 7/125   | $7.48 \times 10^{-5}$  | $8.86 \times 10^{-4}$  |
| LJP006 HEPG2 24H-QL-XII-47-0.12    | 6/90    | $9.46 \times 10^{-5}$  | $1.07 \times 10^{-3}$  |
| LJP006 HME1 3H-QL-XII-47-0.37      | 5/58    | $1.09 \times 10^{-4}$  | $1.21 \times 10^{-3}$  |
| LJP006 MCF7 24H-QL-XII-47-0.37     | 5/58    | $1.09 \times 10^{-4}$  | $1.21 \times 10^{-3}$  |
| LJP006 MCF7 24H-QL-XII-47-1.11     | 6/94    | $1.20 \times 10^{-4}$  | $1.31 \times 10^{-3}$  |
| LJP006 LNCAP 3H-QL-XII-47-0.12     | 4/32    | $1.28 \times 10^{-4}$  | $1.39 \times 10^{-3}$  |
| LJP006 BT20 3H-QL-XII-47-0.37      | 4/33    | $1.45 \times 10^{-4}$  | $1.53 \times 10^{-3}$  |
| LJP006 HS578T 3H-QL-XII-47-1.11    | 4/41    | $3.40 \times 10^{-4}$  | $3.17 \times 10^{-3}$  |
| LJP006 LNCAP 24H-QL-XII-47-0.37    | 6/115   | $3.62 \times 10^{-4}$  | $3.33 \times 10^{-3}$  |
| LJP006 SKBR3 24H-QL-XII-47-0.12    | 4/60    | $1.45 \times 10^{-3}$  | $1.07 \times 10^{-2}$  |
| LJP006 HS578T 3H-QL-XII-47-3.33    | 3/30    | $1.84 \times 10^{-3}$  | $1.30 \times 10^{-2}$  |
| LJP006 MDAMB231 24H-QL-XII-47-10   | 4/65    | $1.96 \times 10^{-3}$  | $1.37 \times 10^{-2}$  |
| LJP006 SKBR3 3H-QL-XII-47-1.11     | 4/72    | $2.84 \times 10^{-3}$  | $1.86 \times 10^{-2}$  |
| LJP006 MCF7 24H-QL-XII-47-10       | 5/124   | $3.49 \times 10^{-3}$  | $2.19 \times 10^{-2}$  |
| LJP006 BT20 24H-QL-XII-47-0.12     | 5/141   | $6.01 \times 10^{-3}$  | $3.38 \times 10^{-2}$  |
| LJP006 BT20 3H-QL-XII-47-0.04      | 2/15    | $6.47 \times 10^{-3}$  | $3.57 \times 10^{-2}$  |
| LJP006 A549 24H-QL-XII-47-0.37     | 4/98    | $8.49 \times 10^{-3}$  | $4.43 \times 10^{-2}$  |
| LJP006 MCF10A 24H-QL-XII-47-1.11   | 3/53    | $9.24 \times 10^{-3}$  | $4.75 \times 10^{-2}$  |
| LJP006 SKBR3 24H-QL-XII-47-0.37    | 4/101   | $9.42 \times 10^{-3}$  | $4.81 \times 10^{-2}$  |

Table S24: Geldanamycin significantly affects the expression of the selected 163 genes as evident in the ‘LINCS L1000 Chem Pert up’ category in Enrichr. The last number after the - is dose density.

| Term                                 | Overlap | P-value                | Adjusted P-value      |
|--------------------------------------|---------|------------------------|-----------------------|
| LINCS L1000 Chem Pert up             |         |                        |                       |
| LJP006 LNCAP 3H-geldanamycin-0.12    | 9/34    | $5.59 \times 10^{-12}$ | $1.10 \times 10^{-9}$ |
| LJP006 HS578T 3H-geldanamycin-10     | 10/63   | $8.63 \times 10^{-11}$ | $1.01 \times 10^{-8}$ |
| LJP005 PC3 24H-geldanamycin-1.11     | 11/86   | $1.08 \times 10^{-10}$ | $1.22 \times 10^{-8}$ |
| LJP006 MCF7 24H-geldanamycin-0.12    | 10/73   | $3.91 \times 10^{-10}$ | $3.44 \times 10^{-8}$ |
| LJP006 PC3 24H-geldanamycin-0.37     | 8/45    | $2.73 \times 10^{-9}$  | $1.69 \times 10^{-7}$ |
| LJP005 BT20 3H-geldanamycin-10       | 9/65    | $2.75 \times 10^{-9}$  | $1.69 \times 10^{-7}$ |
| LJP006 HME1 24H-geldanamycin-1.11    | 13/185  | $4.00 \times 10^{-9}$  | $2.31 \times 10^{-7}$ |
| LJP006 MCF10A 24H-geldanamycin-10    | 12/157  | $6.28 \times 10^{-9}$  | $3.46 \times 10^{-7}$ |
| LJP005 MCF7 3H-geldanamycin-0.37     | 9/72    | $6.97 \times 10^{-9}$  | $3.80 \times 10^{-7}$ |
| LJP006 HME1 3H-geldanamycin-3.33     | 9/76    | $1.13 \times 10^{-8}$  | $5.70 \times 10^{-7}$ |
| LJP005 MCF7 3H-geldanamycin-1.11     | 8/56    | $1.67 \times 10^{-8}$  | $7.88 \times 10^{-7}$ |
| LJP005 HS578T 3H-geldanamycin-0.12   | 7/41    | $3.74 \times 10^{-8}$  | $1.56 \times 10^{-6}$ |
| LJP006 HME1 3H-geldanamycin-1.11     | 9/90    | $5.11 \times 10^{-8}$  | $2.04 \times 10^{-6}$ |
| LJP005 PC3 24H-geldanamycin-3.33     | 9/95    | $8.20 \times 10^{-8}$  | $3.04 \times 10^{-6}$ |
| LJP005 HS578T 3H-geldanamycin-3.33   | 8/78    | $2.37 \times 10^{-7}$  | $7.37 \times 10^{-6}$ |
| LJP006 BT20 3H-geldanamycin-10       | 7/54    | $2.69 \times 10^{-7}$  | $8.26 \times 10^{-6}$ |
| LJP006 MCF10A 3H-geldanamycin-10     | 9/113   | $3.68 \times 10^{-7}$  | $1.07 \times 10^{-5}$ |
| LJP006 HS578T 3H-geldanamycin-3.33   | 8/84    | $4.22 \times 10^{-7}$  | $1.20 \times 10^{-5}$ |
| LJP005 HS578T 3H-geldanamycin-0.37   | 7/58    | $4.45 \times 10^{-7}$  | $1.25 \times 10^{-5}$ |
| LJP006 LNCAP 3H-geldanamycin-1.11    | 7/59    | $5.02 \times 10^{-7}$  | $1.39 \times 10^{-5}$ |
| LJP005 MCF10A 3H-geldanamycin-10     | 8/86    | $5.07 \times 10^{-7}$  | $1.40 \times 10^{-5}$ |
| LJP005 MDAMB231 3H-geldanamycin-10   | 8/88    | $6.06 \times 10^{-7}$  | $1.63 \times 10^{-5}$ |
| LJP005 MCF7 24H-geldanamycin-3.33    | 10/158  | $6.96 \times 10^{-7}$  | $1.84 \times 10^{-5}$ |
| LJP006 MCF7 24H-geldanamycin-0.37    | 9/125   | $8.67 \times 10^{-7}$  | $2.20 \times 10^{-5}$ |
| LJP006 LNCAP 24H-geldanamycin-1.11   | 8/97    | $1.28 \times 10^{-6}$  | $3.02 \times 10^{-5}$ |
| LJP006 MCF7 24H-geldanamycin-1.11    | 9/135   | $1.65 \times 10^{-6}$  | $3.74 \times 10^{-5}$ |
| LJP005 MDAMB231 3H-geldanamycin-0.37 | 6/47    | $2.18 \times 10^{-6}$  | $4.69 \times 10^{-5}$ |
| LJP006 MDAMB231 3H-geldanamycin-0.12 | 6/47    | $2.18 \times 10^{-6}$  | $4.68 \times 10^{-5}$ |
| LJP006 MCF10A 3H-geldanamycin-0.37   | 8/107   | $2.69 \times 10^{-6}$  | $5.62 \times 10^{-5}$ |
| LJP006 HME1 3H-geldanamycin-0.37     | 7/77    | $3.13 \times 10^{-6}$  | $6.34 \times 10^{-5}$ |
| LJP006 HME1 3H-geldanamycin-10       | 7/78    | $3.41 \times 10^{-6}$  | $6.81 \times 10^{-5}$ |
| LJP005 BT20 3H-geldanamycin-0.04     | 5/31    | $4.84 \times 10^{-6}$  | $9.18 \times 10^{-5}$ |
| LJP006 BT20 24H-geldanamycin-0.37    | 7/83    | $5.18 \times 10^{-6}$  | $9.69 \times 10^{-5}$ |
| LJP005 A549 24H-geldanamycin-3.33    | 8/119   | $5.97 \times 10^{-6}$  | $1.10 \times 10^{-4}$ |
| LJP005 SKBR3 3H-geldanamycin-0.37    | 6/56    | $6.19 \times 10^{-6}$  | $1.13 \times 10^{-4}$ |
| LJP005 SKBR3 3H-geldanamycin-10      | 6/56    | $6.19 \times 10^{-6}$  | $1.13 \times 10^{-4}$ |
| LJP005 MCF10A 24H-geldanamycin-10    | 8/121   | $6.76 \times 10^{-6}$  | $1.21 \times 10^{-4}$ |
| LJP005 MCF7 24H-geldanamycin-10      | 6/57    | $6.88 \times 10^{-6}$  | $1.23 \times 10^{-4}$ |
| LJP006 MCF7 3H-geldanamycin-0.37     | 6/57    | $6.88 \times 10^{-6}$  | $1.23 \times 10^{-4}$ |
| LJP005 MCF7 24H-geldanamycin-1.11    | 8/122   | $7.18 \times 10^{-6}$  | $1.27 \times 10^{-4}$ |
| LJP005 HS578T 24H-geldanamycin-0.12  | 7/88    | $7.66 \times 10^{-6}$  | $1.33 \times 10^{-4}$ |
| LJP005 HS578T 3H-geldanamycin-0.04   | 5/34    | $7.77 \times 10^{-6}$  | $1.35 \times 10^{-4}$ |
| LJP005 SKBR3 3H-geldanamycin-0.12    | 5/34    | $7.77 \times 10^{-6}$  | $1.34 \times 10^{-4}$ |
| LJP006 A549 24H-geldanamycin-10      | 8/125   | $8.59 \times 10^{-6}$  | $1.47 \times 10^{-4}$ |
| LJP005 HS578T 3H-geldanamycin-1.11   | 6/60    | $9.30 \times 10^{-6}$  | $1.57 \times 10^{-4}$ |
| LJP006 LNCAP 24H-geldanamycin-3.33   | 9/168   | $9.95 \times 10^{-6}$  | $1.66 \times 10^{-4}$ |
| LJP006 MDAMB231 3H-geldanamycin-3.33 | 6/61    | $1.02 \times 10^{-5}$  | $1.69 \times 10^{-4}$ |
| LJP006 MCF10A 24H-geldanamycin-3.33  | 9/175   | $1.38 \times 10^{-5}$  | $2.16 \times 10^{-4}$ |
| LJP006 BT20 24H-geldanamycin-10      | 8/134   | $1.43 \times 10^{-5}$  | $2.24 \times 10^{-4}$ |
| LJP005 MCF7 24H-geldanamycin-0.37    | 6/65    | $1.48 \times 10^{-5}$  | $2.31 \times 10^{-4}$ |
| LJP005 BT20 3H-geldanamycin-3.33     | 5/39    | $1.56 \times 10^{-5}$  | $2.40 \times 10^{-4}$ |
| CPC015 A375 6H-geldanamycin-10.0     | 8/139   | $1.87 \times 10^{-5}$  | $2.79 \times 10^{-4}$ |
| LJP006 HS578T 24H-geldanamycin-0.37  | 8/141   | $2.07 \times 10^{-5}$  | $3.04 \times 10^{-4}$ |
| LJP005 HS578T 3H-geldanamycin-10     | 6/70    | $2.28 \times 10^{-5}$  | $3.31 \times 10^{-4}$ |

Table S24: (Continued)

|                                       |       |                       |                       |
|---------------------------------------|-------|-----------------------|-----------------------|
| LJP006 MCF10A 24H-geldanamycin-0.37   | 9/191 | $2.76 \times 10^{-5}$ | $3.91 \times 10^{-4}$ |
| LJP006 SKBR3 3H-geldanamycin-1.11     | 5/45  | $3.17 \times 10^{-5}$ | $4.41 \times 10^{-4}$ |
| LJP006 MDAMB231 24H-geldanamycin-3.33 | 7/112 | $3.71 \times 10^{-5}$ | $5.03 \times 10^{-4}$ |
| LJP005 MCF10A 24H-geldanamycin-0.12   | 9/202 | $4.29 \times 10^{-5}$ | $5.69 \times 10^{-4}$ |
| LJP006 LNCAP 3H-geldanamycin-0.37     | 5/48  | $4.36 \times 10^{-5}$ | $5.77 \times 10^{-4}$ |
| LJP006 MDAMB231 24H-geldanamycin-0.37 | 6/79  | $4.54 \times 10^{-5}$ | $5.96 \times 10^{-4}$ |
| LJP006 HME1 24H-geldanamycin-0.12     | 9/204 | $4.63 \times 10^{-5}$ | $6.05 \times 10^{-4}$ |
| CPC011 HT29 6H-geldanamycin-10.0      | 6/83  | $6.01 \times 10^{-5}$ | $7.52 \times 10^{-4}$ |
| LJP006 MDAMB231 3H-geldanamycin-10    | 5/52  | $6.45 \times 10^{-5}$ | $7.90 \times 10^{-4}$ |
| LJP006 HT29 24H-geldanamycin-3.33     | 6/85  | $6.87 \times 10^{-5}$ | $8.37 \times 10^{-4}$ |
| LJP006 BT20 24H-geldanamycin-0.12     | 6/86  | $7.33 \times 10^{-5}$ | $8.85 \times 10^{-4}$ |
| LJP006 MCF10A 3H-geldanamycin-0.04    | 5/54  | $7.75 \times 10^{-5}$ | $9.26 \times 10^{-4}$ |
| LJP005 HS578T 24H-geldanamycin-1.11   | 7/128 | $8.69 \times 10^{-5}$ | $1.02 \times 10^{-3}$ |
| LJP006 MDAMB231 3H-geldanamycin-1.11  | 5/57  | $1.01 \times 10^{-4}$ | $1.15 \times 10^{-3}$ |
| CPC006 DV90 6H-geldanamycin-10.0      | 6/91  | $1.01 \times 10^{-4}$ | $1.15 \times 10^{-3}$ |
| LJP006 MDAMB231 24H-geldanamycin-1.11 | 6/91  | $1.01 \times 10^{-4}$ | $1.15 \times 10^{-3}$ |
| LJP006 HME1 24H-geldanamycin-10       | 8/177 | $1.04 \times 10^{-4}$ | $1.18 \times 10^{-3}$ |
| LJP005 SKBR3 24H-geldanamycin-1.11    | 6/93  | $1.13 \times 10^{-4}$ | $1.27 \times 10^{-3}$ |
| LJP006 MCF10A 3H-geldanamycin-1.11    | 6/95  | $1.28 \times 10^{-4}$ | $1.41 \times 10^{-3}$ |
| LJP006 HME1 3H-geldanamycin-0.04      | 4/32  | $1.28 \times 10^{-4}$ | $1.41 \times 10^{-3}$ |
| LJP005 HCC515 24H-geldanamycin-3.33   | 6/99  | $1.60 \times 10^{-4}$ | $1.70 \times 10^{-3}$ |
| LJP005 BT20 24H-geldanamycin-1.11     | 5/68  | $2.33 \times 10^{-4}$ | $2.31 \times 10^{-3}$ |
| LJP006 BT20 24H-geldanamycin-1.11     | 5/68  | $2.33 \times 10^{-4}$ | $2.30 \times 10^{-3}$ |
| LJP006 MCF10A 3H-geldanamycin-3.33    | 6/108 | $2.58 \times 10^{-4}$ | $2.51 \times 10^{-3}$ |
| LJP005 HS578T 24H-geldanamycin-0.37   | 6/109 | $2.71 \times 10^{-4}$ | $2.63 \times 10^{-3}$ |
| LJP006 HCC515 24H-geldanamycin-1.11   | 6/109 | $2.71 \times 10^{-4}$ | $2.63 \times 10^{-3}$ |
| LJP005 MCF10A 24H-geldanamycin-0.37   | 8/205 | $2.84 \times 10^{-4}$ | $2.74 \times 10^{-3}$ |
| LJP006 A549 24H-geldanamycin-3.33     | 6/110 | $2.85 \times 10^{-4}$ | $2.74 \times 10^{-3}$ |
| LJP006 PC3 24H-geldanamycin-10        | 5/73  | $3.25 \times 10^{-4}$ | $3.06 \times 10^{-3}$ |
| LJP005 PC3 24H-geldanamycin-10        | 4/41  | $3.40 \times 10^{-4}$ | $3.19 \times 10^{-3}$ |
| LJP005 BT20 24H-geldanamycin-10       | 5/74  | $3.46 \times 10^{-4}$ | $3.22 \times 10^{-3}$ |
| LJP005 MCF10A 3H-geldanamycin-0.12    | 5/74  | $3.46 \times 10^{-4}$ | $3.22 \times 10^{-3}$ |
| LJP005 HEPG2 24H-geldanamycin-1.11    | 6/115 | $3.62 \times 10^{-4}$ | $3.35 \times 10^{-3}$ |
| LJP005 MCF10A 3H-geldanamycin-3.33    | 6/117 | $3.97 \times 10^{-4}$ | $3.63 \times 10^{-3}$ |
| LJP006 MCF7 3H-geldanamycin-10        | 4/43  | $4.10 \times 10^{-4}$ | $3.72 \times 10^{-3}$ |
| CPC019 VCAP 6H-geldanamycin-10.0      | 6/120 | $4.54 \times 10^{-4}$ | $4.05 \times 10^{-3}$ |
| LJP006 HME1 24H-geldanamycin-3.33     | 7/168 | $4.63 \times 10^{-4}$ | $4.12 \times 10^{-3}$ |
| LJP005 HCC515 24H-geldanamycin-1.11   | 5/81  | $5.26 \times 10^{-4}$ | $4.60 \times 10^{-3}$ |
| LJP006 SKBR3 3H-geldanamycin-0.04     | 4/46  | $5.31 \times 10^{-4}$ | $4.62 \times 10^{-3}$ |
| LJP006 LNCAP 24H-geldanamycin-10      | 6/125 | $5.64 \times 10^{-4}$ | $4.86 \times 10^{-3}$ |
| LJP006 HME1 3H-geldanamycin-0.12      | 4/47  | $5.77 \times 10^{-4}$ | $4.96 \times 10^{-3}$ |
| LJP006 MDAMB231 24H-geldanamycin-0.12 | 5/84  | $6.21 \times 10^{-4}$ | $5.28 \times 10^{-3}$ |
| LJP005 HA1E 24H-geldanamycin-0.12     | 4/48  | $6.26 \times 10^{-4}$ | $5.31 \times 10^{-3}$ |
| CPC020 HA1E 6H-geldanamycin-10.0      | 5/85  | $6.56 \times 10^{-4}$ | $5.53 \times 10^{-3}$ |
| LJP005 HS578T 24H-geldanamycin-3.33   | 5/85  | $6.56 \times 10^{-4}$ | $5.52 \times 10^{-3}$ |
| LJP006 HCC515 24H-geldanamycin-0.12   | 4/49  | $6.77 \times 10^{-4}$ | $5.68 \times 10^{-3}$ |
| CPC009 A549 6H-geldanamycin-10.0      | 5/87  | $7.29 \times 10^{-4}$ | $6.06 \times 10^{-3}$ |
| LJP006 HS578T 24H-geldanamycin-0.12   | 5/89  | $8.09 \times 10^{-4}$ | $6.56 \times 10^{-3}$ |
| LJP006 HT29 24H-geldanamycin-1.11     | 5/91  | $8.94 \times 10^{-4}$ | $7.15 \times 10^{-3}$ |
| LJP005 MCF10A 24H-geldanamycin-3.33   | 7/188 | $9.01 \times 10^{-4}$ | $7.19 \times 10^{-3}$ |
| CPC016 A375 6H-geldanamycin-10.0      | 4/53  | $9.12 \times 10^{-4}$ | $7.27 \times 10^{-3}$ |
| LJP005 MCF7 3H-geldanamycin-10        | 4/54  | $9.79 \times 10^{-4}$ | $7.69 \times 10^{-3}$ |
| LJP006 MDAMB231 24H-geldanamycin-10   | 5/93  | $9.86 \times 10^{-4}$ | $7.71 \times 10^{-3}$ |
| CPC005 HT29 6H-geldanamycin-10.0      | 5/94  | $1.04 \times 10^{-3}$ | $8.08 \times 10^{-3}$ |
| LJP005 SKBR3 3H-geldanamycin-0.04     | 3/25  | $1.07 \times 10^{-3}$ | $8.27 \times 10^{-3}$ |
| LJP006 SKBR3 24H-geldanamycin-0.37    | 5/95  | $1.09 \times 10^{-3}$ | $8.35 \times 10^{-3}$ |
| LJP006 HME1 24H-geldanamycin-0.04     | 6/145 | $1.22 \times 10^{-3}$ | $9.20 \times 10^{-3}$ |



Table S24: (Continued)

|                                      |       |                       |                       |
|--------------------------------------|-------|-----------------------|-----------------------|
| LJP006 HA1E 24H-geldanamycin-0.12    | 4/58  | $1.28 \times 10^{-3}$ | $9.54 \times 10^{-3}$ |
| LJP006 PC3 24H-geldanamycin-1.11     | 4/58  | $1.28 \times 10^{-3}$ | $9.53 \times 10^{-3}$ |
| CPC010 A375 6H-geldanamycin-10.0     | 5/99  | $1.31 \times 10^{-3}$ | $9.70 \times 10^{-3}$ |
| CPC006 NOMO1 6H-geldanamycin-10.0    | 5/100 | $1.37 \times 10^{-3}$ | $1.01 \times 10^{-2}$ |
| LJP006 LNCAP 3H-geldanamycin-3.33    | 4/59  | $1.37 \times 10^{-3}$ | $1.00 \times 10^{-2}$ |
| LJP006 HS578T 24H-geldanamycin-10    | 6/154 | $1.66 \times 10^{-3}$ | $1.18 \times 10^{-2}$ |
| LJP006 HT29 24H-geldanamycin-10      | 5/105 | $1.70 \times 10^{-3}$ | $1.20 \times 10^{-2}$ |
| CPC019 HCC515 6H-geldanamycin-10.0   | 5/106 | $1.77 \times 10^{-3}$ | $1.24 \times 10^{-2}$ |
| LJP005 MDAMB231 3H-geldanamycin-1.11 | 4/64  | $1.85 \times 10^{-3}$ | $1.29 \times 10^{-2}$ |
| LJP006 HCC515 24H-geldanamycin-10    | 4/64  | $1.85 \times 10^{-3}$ | $1.29 \times 10^{-2}$ |
| CPC006 SW620 6H-geldanamycin-10.0    | 4/65  | $1.96 \times 10^{-3}$ | $1.36 \times 10^{-2}$ |
| LJP005 SKBR3 3H-geldanamycin-3.33    | 4/67  | $2.19 \times 10^{-3}$ | $1.48 \times 10^{-2}$ |
| LJP006 HME1 24H-geldanamycin-0.37    | 6/163 | $2.22 \times 10^{-3}$ | $1.49 \times 10^{-2}$ |
| LJP005 A375 24H-geldanamycin-3.33    | 5/112 | $2.25 \times 10^{-3}$ | $1.52 \times 10^{-2}$ |
| LJP006 MCF7 24H-geldanamycin-3.33    | 4/70  | $2.57 \times 10^{-3}$ | $1.70 \times 10^{-2}$ |
| LJP006 SKBR3 24H-geldanamycin-0.04   | 4/72  | $2.84 \times 10^{-3}$ | $1.84 \times 10^{-2}$ |
| LJP006 MCF7 3H-geldanamycin-1.11     | 3/37  | $3.37 \times 10^{-3}$ | $2.11 \times 10^{-2}$ |
| LJP006 MCF10A 24H-geldanamycin-0.12  | 6/182 | $3.82 \times 10^{-3}$ | $2.33 \times 10^{-2}$ |
| CPC006 VCAP 6H-geldanamycin-10.0     | 7/244 | $3.93 \times 10^{-3}$ | $2.38 \times 10^{-2}$ |
| CPC004 VCAP 6H-geldanamycin-10.0     | 4/80  | $4.16 \times 10^{-3}$ | $2.50 \times 10^{-2}$ |
| LJP006 HT29 24H-geldanamycin-0.37    | 3/40  | $4.21 \times 10^{-3}$ | $2.50 \times 10^{-2}$ |
| CPC001 PC3 6H-geldanamycin-10.0      | 5/130 | $4.27 \times 10^{-3}$ | $2.54 \times 10^{-2}$ |
| LJP006 SKBR3 3H-geldanamycin-3.33    | 3/41  | $4.51 \times 10^{-3}$ | $2.65 \times 10^{-2}$ |
| LJP005 SKBR3 24H-geldanamycin-0.12   | 4/82  | $4.54 \times 10^{-3}$ | $2.66 \times 10^{-2}$ |
| LJP006 HCC515 24H-geldanamycin-3.33  | 4/84  | $4.95 \times 10^{-3}$ | $2.84 \times 10^{-2}$ |
| CPC008 A549 6H-geldanamycin-10.0     | 5/137 | $5.33 \times 10^{-3}$ | $3.02 \times 10^{-2}$ |
| LJP006 SKBR3 3H-geldanamycin-0.37    | 3/44  | $5.51 \times 10^{-3}$ | $3.08 \times 10^{-2}$ |
| CPC004 HT29 6H-geldanamycin-10.0     | 4/87  | $5.60 \times 10^{-3}$ | $3.13 \times 10^{-2}$ |
| LJP006 BT20 24H-geldanamycin-3.33    | 4/88  | $5.83 \times 10^{-3}$ | $3.24 \times 10^{-2}$ |
| LJP005 SKBR3 24H-geldanamycin-0.04   | 3/46  | $6.24 \times 10^{-3}$ | $3.40 \times 10^{-2}$ |
| LJP006 MCF7 24H-geldanamycin-10      | 3/46  | $6.24 \times 10^{-3}$ | $3.40 \times 10^{-2}$ |
| CPC006 SKLU1 6H-geldanamycin-10.0    | 4/90  | $6.31 \times 10^{-3}$ | $3.43 \times 10^{-2}$ |
| LJP005 MCF10A 3H-geldanamycin-0.37   | 4/90  | $6.31 \times 10^{-3}$ | $3.43 \times 10^{-2}$ |
| LJP006 HA1E 24H-geldanamycin-10      | 4/90  | $6.31 \times 10^{-3}$ | $3.43 \times 10^{-2}$ |
| LJP006 SKBR3 3H-geldanamycin-10      | 3/49  | $7.44 \times 10^{-3}$ | $3.91 \times 10^{-2}$ |
| LJP006 A549 24H-geldanamycin-1.11    | 4/95  | $7.62 \times 10^{-3}$ | $3.99 \times 10^{-2}$ |
| LJP005 MCF10A 3H-geldanamycin-0.04   | 3/50  | $7.87 \times 10^{-3}$ | $4.10 \times 10^{-2}$ |
| LJP005 A549 24H-geldanamycin-1.11    | 4/99  | $8.79 \times 10^{-3}$ | $4.45 \times 10^{-2}$ |
| CPC019 HA1E 6H-geldanamycin-10.0     | 4/100 | $9.10 \times 10^{-3}$ | $4.58 \times 10^{-2}$ |
| LJP006 LNCAP 24H-geldanamycin-0.37   | 4/101 | $9.42 \times 10^{-3}$ | $4.68 \times 10^{-2}$ |

Table S25: Geldanamycin significantly affects the expression of the selected 163 genes as evident in the ‘LINCS L1000 Chem Pert down’ category in Enrichr. The last number after the - is dose density.

| Term                                  | Overlap | P-value                | Adjusted P-value       |
|---------------------------------------|---------|------------------------|------------------------|
| LINCS L1000 Chem Pert down            |         |                        |                        |
| LJP005 HA1E 24H-geldanamycin-3.33     | 18/148  | $2.41 \times 10^{-16}$ | $3.06 \times 10^{-13}$ |
| LJP005 HS578T 24H-geldanamycin-10     | 16/131  | $1.11 \times 10^{-14}$ | $6.92 \times 10^{-12}$ |
| LJP006 SKBR3 24H-geldanamycin-0.37    | 14/91   | $2.01 \times 10^{-14}$ | $1.07 \times 10^{-11}$ |
| LJP006 HA1E 24H-geldanamycin-3.33     | 16/138  | $2.55 \times 10^{-14}$ | $1.26 \times 10^{-11}$ |
| LJP005 HS578T 24H-geldanamycin-3.33   | 15/118  | $4.24 \times 10^{-14}$ | $1.98 \times 10^{-11}$ |
| LJP006 HA1E 24H-geldanamycin-0.37     | 15/121  | $6.20 \times 10^{-14}$ | $2.53 \times 10^{-11}$ |
| LJP006 HA1E 24H-geldanamycin-1.11     | 16/157  | $1.97 \times 10^{-13}$ | $6.87 \times 10^{-11}$ |
| LJP006 MDAMB231 24H-geldanamycin-1.11 | 14/123  | $1.45 \times 10^{-12}$ | $3.54 \times 10^{-10}$ |
| LJP006 SKBR3 24H-geldanamycin-0.12    | 12/78   | $1.56 \times 10^{-12}$ | $3.71 \times 10^{-10}$ |
| LJP005 A375 24H-geldanamycin-3.33     | 16/183  | $2.14 \times 10^{-12}$ | $4.73 \times 10^{-10}$ |
| LJP005 HA1E 24H-geldanamycin-10       | 14/137  | $6.46 \times 10^{-12}$ | $1.14 \times 10^{-9}$  |
| LJP006 A375 24H-geldanamycin-0.37     | 15/166  | $6.69 \times 10^{-12}$ | $1.16 \times 10^{-9}$  |
| LJP005 HA1E 24H-geldanamycin-1.11     | 14/142  | $1.06 \times 10^{-11}$ | $1.68 \times 10^{-9}$  |
| LJP005 SKBR3 24H-geldanamycin-0.37    | 11/82   | $6.38 \times 10^{-11}$ | $7.41 \times 10^{-9}$  |
| LJP005 SKBR3 24H-geldanamycin-1.11    | 10/63   | $8.63 \times 10^{-11}$ | $9.22 \times 10^{-9}$  |
| LJP005 HS578T 24H-geldanamycin-1.11   | 12/109  | $9.04 \times 10^{-11}$ | $9.60 \times 10^{-9}$  |
| LJP005 BT20 24H-geldanamycin-0.12     | 10/64   | $1.02 \times 10^{-10}$ | $1.05 \times 10^{-8}$  |
| LJP005 HA1E 24H-geldanamycin-0.37     | 13/141  | $1.39 \times 10^{-10}$ | $1.37 \times 10^{-8}$  |
| LJP006 A375 24H-geldanamycin-1.11     | 14/182  | $3.00 \times 10^{-10}$ | $2.60 \times 10^{-8}$  |
| LJP006 MDAMB231 24H-geldanamycin-0.37 | 11/96   | $3.64 \times 10^{-10}$ | $3.05 \times 10^{-8}$  |
| LJP006 BT20 24H-geldanamycin-1.11     | 10/75   | $5.15 \times 10^{-10}$ | $4.04 \times 10^{-8}$  |
| LJP005 HEPG2 24H-geldanamycin-3.33    | 13/159  | $6.23 \times 10^{-10}$ | $4.77 \times 10^{-8}$  |
| LJP006 HS578T 24H-geldanamycin-10     | 12/132  | $8.57 \times 10^{-10}$ | $6.20 \times 10^{-8}$  |
| LJP005 MCF10A 3H-geldanamycin-0.04    | 9/61    | $1.53 \times 10^{-9}$  | $9.92 \times 10^{-8}$  |
| LJP006 SKBR3 24H-geldanamycin-0.04    | 10/89   | $2.86 \times 10^{-9}$  | $1.68 \times 10^{-7}$  |
| LJP006 HS578T 24H-geldanamycin-0.37   | 12/148  | $3.20 \times 10^{-9}$  | $1.85 \times 10^{-7}$  |
| LJP006 SKBR3 24H-geldanamycin-1.11    | 8/50    | $6.57 \times 10^{-9}$  | $3.39 \times 10^{-7}$  |
| LJP006 HEPG2 24H-geldanamycin-3.33    | 10/98   | $7.41 \times 10^{-9}$  | $3.75 \times 10^{-7}$  |
| LJP006 BT20 24H-geldanamycin-0.12     | 9/74    | $8.93 \times 10^{-9}$  | $4.44 \times 10^{-7}$  |
| LJP005 SKBR3 24H-geldanamycin-0.04    | 9/78    | $1.43 \times 10^{-8}$  | $6.49 \times 10^{-7}$  |
| LJP005 A375 24H-geldanamycin-0.04     | 9/81    | $2.01 \times 10^{-8}$  | $8.55 \times 10^{-7}$  |
| LJP006 HS578T 24H-geldanamycin-1.11   | 11/145  | $2.97 \times 10^{-8}$  | $1.18 \times 10^{-6}$  |
| LJP006 HA1E 24H-geldanamycin-10       | 9/86    | $3.42 \times 10^{-8}$  | $1.34 \times 10^{-6}$  |
| LJP006 SKBR3 24H-geldanamycin-3.33    | 9/86    | $3.42 \times 10^{-8}$  | $1.33 \times 10^{-6}$  |
| LJP006 HME1 24H-geldanamycin-0.04     | 10/121  | $5.70 \times 10^{-8}$  | $2.08 \times 10^{-6}$  |
| LJP006 HS578T 24H-geldanamycin-3.33   | 10/122  | $6.17 \times 10^{-8}$  | $2.24 \times 10^{-6}$  |
| LJP006 MCF10A 3H-geldanamycin-0.37    | 8/66    | $6.30 \times 10^{-8}$  | $2.25 \times 10^{-6}$  |
| LJP005 MDAMB231 24H-geldanamycin-3.33 | 7/46    | $8.60 \times 10^{-8}$  | $2.95 \times 10^{-6}$  |
| LJP006 A549 24H-geldanamycin-0.37     | 6/28    | $8.68 \times 10^{-8}$  | $2.96 \times 10^{-6}$  |
| LJP006 HS578T 24H-geldanamycin-0.12   | 9/97    | $9.84 \times 10^{-8}$  | $3.31 \times 10^{-6}$  |
| LJP006 HME1 24H-geldanamycin-3.33     | 11/164  | $1.05 \times 10^{-7}$  | $3.51 \times 10^{-6}$  |
| LJP006 A375 24H-geldanamycin-0.04     | 9/104   | $1.80 \times 10^{-7}$  | $5.55 \times 10^{-6}$  |
| LJP005 SKBR3 24H-geldanamycin-3.33    | 8/78    | $2.37 \times 10^{-7}$  | $6.98 \times 10^{-6}$  |
| LJP006 MCF10A 3H-geldanamycin-3.33    | 8/80    | $2.89 \times 10^{-7}$  | $8.17 \times 10^{-6}$  |
| LJP006 MDAMB231 24H-geldanamycin-3.33 | 8/84    | $4.22 \times 10^{-7}$  | $1.12 \times 10^{-5}$  |
| LJP005 MCF10A 3H-geldanamycin-0.37    | 8/85    | $4.63 \times 10^{-7}$  | $1.20 \times 10^{-5}$  |
| LJP005 MCF10A 3H-geldanamycin-0.12    | 8/86    | $5.07 \times 10^{-7}$  | $1.29 \times 10^{-5}$  |
| LJP006 HME1 24H-geldanamycin-10       | 10/153  | $5.17 \times 10^{-7}$  | $1.31 \times 10^{-5}$  |
| LJP006 HEPG2 24H-geldanamycin-1.11    | 8/88    | $6.06 \times 10^{-7}$  | $1.50 \times 10^{-5}$  |
| LJP005 HS578T 24H-geldanamycin-0.12   | 8/89    | $6.61 \times 10^{-7}$  | $1.62 \times 10^{-5}$  |
| LJP006 MDAMB231 24H-geldanamycin-0.12 | 8/89    | $6.61 \times 10^{-7}$  | $1.61 \times 10^{-5}$  |
| LJP006 MCF10A 3H-geldanamycin-0.04    | 7/62    | $7.08 \times 10^{-7}$  | $1.72 \times 10^{-5}$  |
| LJP006 BT20 24H-geldanamycin-3.33     | 8/94    | $1.01 \times 10^{-6}$  | $2.32 \times 10^{-5}$  |

Table S25: (Continued)

|                                       |       |                       |                       |
|---------------------------------------|-------|-----------------------|-----------------------|
| LJP006 MDAMB231 24H-geldanamycin-10   | 8/94  | $1.01 \times 10^{-6}$ | $2.32 \times 10^{-5}$ |
| LJP005 BT20 24H-geldanamycin-0.37     | 8/96  | $1.18 \times 10^{-6}$ | $2.67 \times 10^{-5}$ |
| LJP006 PC3 24H-geldanamycin-10        | 8/96  | $1.18 \times 10^{-6}$ | $2.67 \times 10^{-5}$ |
| LJP005 BT20 24H-geldanamycin-1.11     | 7/67  | $1.21 \times 10^{-6}$ | $2.73 \times 10^{-5}$ |
| LJP006 MCF10A 3H-geldanamycin-0.12    | 7/67  | $1.21 \times 10^{-6}$ | $2.72 \times 10^{-5}$ |
| LJP005 HEPG2 24H-geldanamycin-1.11    | 9/131 | $1.29 \times 10^{-6}$ | $2.85 \times 10^{-5}$ |
| LJP006 A375 24H-geldanamycin-3.33     | 9/131 | $1.29 \times 10^{-6}$ | $2.85 \times 10^{-5}$ |
| LJP005 MCF10A 3H-geldanamycin-3.33    | 7/68  | $1.34 \times 10^{-6}$ | $2.96 \times 10^{-5}$ |
| LJP005 MCF7 3H-geldanamycin-10        | 6/45  | $1.67 \times 10^{-6}$ | $3.56 \times 10^{-5}$ |
| LJP006 HA1E 24H-geldanamycin-0.12     | 6/45  | $1.67 \times 10^{-6}$ | $3.56 \times 10^{-5}$ |
| LJP005 HCC515 24H-geldanamycin-3.33   | 9/140 | $2.24 \times 10^{-6}$ | $4.54 \times 10^{-5}$ |
| LJP006 HCC515 24H-geldanamycin-1.11   | 9/144 | $2.83 \times 10^{-6}$ | $5.51 \times 10^{-5}$ |
| LJP006 LNCAP 24H-geldanamycin-3.33    | 9/163 | $7.79 \times 10^{-6}$ | $1.30 \times 10^{-4}$ |
| LJP006 HME1 24H-geldanamycin-0.12     | 9/164 | $8.19 \times 10^{-6}$ | $1.37 \times 10^{-4}$ |
| LJP006 MCF10A 3H-geldanamycin-1.11    | 7/89  | $8.26 \times 10^{-6}$ | $1.37 \times 10^{-4}$ |
| LJP006 PC3 24H-geldanamycin-3.33      | 7/90  | $8.89 \times 10^{-6}$ | $1.46 \times 10^{-4}$ |
| LJP005 SKBR3 24H-geldanamycin-10      | 7/92  | $1.03 \times 10^{-5}$ | $1.66 \times 10^{-4}$ |
| LJP005 HS578T 3H-geldanamycin-0.37    | 5/36  | $1.04 \times 10^{-5}$ | $1.67 \times 10^{-4}$ |
| LJP006 MCF7 3H-geldanamycin-1.11      | 5/38  | $1.37 \times 10^{-5}$ | $2.10 \times 10^{-4}$ |
| LJP006 BT20 24H-geldanamycin-10       | 7/97  | $1.46 \times 10^{-5}$ | $2.24 \times 10^{-4}$ |
| LJP005 SKBR3 24H-geldanamycin-0.12    | 6/69  | $2.10 \times 10^{-5}$ | $3.05 \times 10^{-4}$ |
| LJP006 BT20 24H-geldanamycin-0.37     | 6/69  | $2.10 \times 10^{-5}$ | $3.04 \times 10^{-4}$ |
| LJP006 HME1 3H-geldanamycin-1.11      | 5/42  | $2.25 \times 10^{-5}$ | $3.24 \times 10^{-4}$ |
| LJP005 MCF10A 3H-geldanamycin-10      | 5/43  | $2.53 \times 10^{-5}$ | $3.59 \times 10^{-4}$ |
| LJP005 MCF10A 3H-geldanamycin-1.11    | 6/72  | $2.68 \times 10^{-5}$ | $3.77 \times 10^{-4}$ |
| LJP006 HCC515 24H-geldanamycin-3.33   | 7/110 | $3.31 \times 10^{-5}$ | $4.51 \times 10^{-4}$ |
| LJP006 LNCAP 24H-geldanamycin-1.11    | 7/110 | $3.31 \times 10^{-5}$ | $4.51 \times 10^{-4}$ |
| LJP006 A549 24H-geldanamycin-1.11     | 6/76  | $3.65 \times 10^{-5}$ | $4.88 \times 10^{-4}$ |
| LJP006 HME1 24H-geldanamycin-0.37     | 8/154 | $3.90 \times 10^{-5}$ | $5.18 \times 10^{-4}$ |
| LJP006 SKBR3 24H-geldanamycin-10      | 6/77  | $3.93 \times 10^{-5}$ | $5.19 \times 10^{-4}$ |
| LJP005 A549 24H-geldanamycin-1.11     | 6/78  | $4.23 \times 10^{-5}$ | $5.52 \times 10^{-4}$ |
| LJP005 MDAMB231 24H-geldanamycin-0.12 | 6/78  | $4.23 \times 10^{-5}$ | $5.51 \times 10^{-4}$ |
| LJP006 A375 24H-geldanamycin-0.12     | 8/163 | $5.84 \times 10^{-5}$ | $7.25 \times 10^{-4}$ |
| LJP006 HS578T 3H-geldanamycin-1.11    | 5/52  | $6.45 \times 10^{-5}$ | $7.82 \times 10^{-4}$ |
| LJP005 A549 24H-geldanamycin-3.33     | 7/123 | $6.75 \times 10^{-5}$ | $8.18 \times 10^{-4}$ |
| LJP006 MDAMB231 3H-geldanamycin-1.11  | 5/53  | $7.07 \times 10^{-5}$ | $8.48 \times 10^{-4}$ |
| LJP005 BT20 24H-geldanamycin-0.04     | 6/87  | $7.83 \times 10^{-5}$ | $9.20 \times 10^{-4}$ |
| LJP006 A549 24H-geldanamycin-3.33     | 6/87  | $7.83 \times 10^{-5}$ | $9.19 \times 10^{-4}$ |
| LJP005 PC3 24H-geldanamycin-3.33      | 6/89  | $8.89 \times 10^{-5}$ | $1.02 \times 10^{-3}$ |
| LJP006 HEPG2 24H-geldanamycin-10      | 6/94  | $1.20 \times 10^{-4}$ | $1.31 \times 10^{-3}$ |
| LJP005 HS578T 3H-geldanamycin-1.11    | 4/32  | $1.28 \times 10^{-4}$ | $1.39 \times 10^{-3}$ |
| LJP006 HME1 24H-geldanamycin-1.11     | 7/145 | $1.89 \times 10^{-4}$ | $1.92 \times 10^{-3}$ |
| LJP005 HS578T 3H-geldanamycin-3.33    | 4/36  | $2.04 \times 10^{-4}$ | $2.06 \times 10^{-3}$ |
| LJP005 MCF10A 24H-geldanamycin-10     | 5/67  | $2.17 \times 10^{-4}$ | $2.17 \times 10^{-3}$ |
| LJP006 MDAMB231 3H-geldanamycin-0.12  | 3/16  | $2.75 \times 10^{-4}$ | $2.66 \times 10^{-3}$ |
| LJP006 PC3 24H-geldanamycin-1.11      | 5/72  | $3.05 \times 10^{-4}$ | $2.90 \times 10^{-3}$ |
| LJP005 HS578T 3H-geldanamycin-10      | 4/40  | $3.09 \times 10^{-4}$ | $2.93 \times 10^{-3}$ |
| LJP005 BT20 24H-geldanamycin-3.33     | 5/73  | $3.25 \times 10^{-4}$ | $3.06 \times 10^{-3}$ |
| LJP005 HCC515 24H-geldanamycin-1.11   | 6/113 | $3.29 \times 10^{-4}$ | $3.09 \times 10^{-3}$ |
| LJP006 BT20 3H-geldanamycin-10        | 4/44  | $4.48 \times 10^{-4}$ | $3.98 \times 10^{-3}$ |
| LJP006 HEPG2 24H-geldanamycin-0.37    | 4/44  | $4.48 \times 10^{-4}$ | $3.97 \times 10^{-3}$ |
| LJP005 MDAMB231 24H-geldanamycin-1.11 | 4/46  | $5.31 \times 10^{-4}$ | $4.61 \times 10^{-3}$ |
| LJP006 SKBR3 3H-geldanamycin-0.12     | 3/20  | $5.47 \times 10^{-4}$ | $4.71 \times 10^{-3}$ |
| LJP006 LNCAP 24H-geldanamycin-10      | 7/173 | $5.51 \times 10^{-4}$ | $4.74 \times 10^{-3}$ |
| LJP006 HT29 24H-geldanamycin-1.11     | 5/85  | $6.56 \times 10^{-4}$ | $5.47 \times 10^{-3}$ |
| LJP005 SKBR3 3H-geldanamycin-0.04     | 4/49  | $6.77 \times 10^{-4}$ | $5.62 \times 10^{-3}$ |
| LJP005 HS578T 3H-geldanamycin-0.04    | 3/22  | $7.30 \times 10^{-4}$ | $6.01 \times 10^{-3}$ |

Table S25: (Continued)

|                                       |       |                       |                       |
|---------------------------------------|-------|-----------------------|-----------------------|
| LJP006 SKBR3 3H-geldanamycin-1.11     | 4/51  | $7.89 \times 10^{-4}$ | $6.39 \times 10^{-3}$ |
| LJP005 MCF10A 24H-geldanamycin-3.33   | 6/134 | $8.13 \times 10^{-4}$ | $6.56 \times 10^{-3}$ |
| LJP005 BT20 24H-geldanamycin-10       | 4/52  | $8.49 \times 10^{-4}$ | $6.82 \times 10^{-3}$ |
| LJP006 MCF10A 24H-geldanamycin-0.12   | 6/137 | $9.12 \times 10^{-4}$ | $7.26 \times 10^{-3}$ |
| LJP005 SKBR3 3H-geldanamycin-3.33     | 4/53  | $9.12 \times 10^{-4}$ | $7.25 \times 10^{-3}$ |
| LJP006 HS578T 3H-geldanamycin-3.33    | 4/53  | $9.12 \times 10^{-4}$ | $7.24 \times 10^{-3}$ |
| LJP005 MDAMB231 24H-geldanamycin-0.37 | 4/54  | $9.79 \times 10^{-4}$ | $7.70 \times 10^{-3}$ |
| CPC014 NPC 24H-geldanamycin-10.0      | 6/139 | $9.84 \times 10^{-4}$ | $7.71 \times 10^{-3}$ |
| LJP006 HS578T 3H-geldanamycin-0.37    | 4/56  | $1.12 \times 10^{-3}$ | $8.60 \times 10^{-3}$ |
| LJP006 MCF10A 24H-geldanamycin-0.37   | 6/144 | $1.18 \times 10^{-3}$ | $9.01 \times 10^{-3}$ |
| LJP005 MCF10A 24H-geldanamycin-0.12   | 6/147 | $1.31 \times 10^{-3}$ | $9.80 \times 10^{-3}$ |
| LJP006 MCF10A 24H-geldanamycin-0.04   | 5/102 | $1.49 \times 10^{-3}$ | $1.09 \times 10^{-2}$ |
| LJP005 SKBR3 3H-geldanamycin-0.12     | 3/28  | $1.50 \times 10^{-3}$ | $1.09 \times 10^{-2}$ |
| CPC018 A549 24H-geldanamycin-10.0     | 5/104 | $1.62 \times 10^{-3}$ | $1.17 \times 10^{-2}$ |
| CPC009 MCF7 24H-geldanamycin-10.0     | 5/108 | $1.92 \times 10^{-3}$ | $1.35 \times 10^{-2}$ |
| LJP005 MDAMB231 3H-geldanamycin-3.33  | 3/31  | $2.02 \times 10^{-3}$ | $1.40 \times 10^{-2}$ |
| LJP005 MCF10A 24H-geldanamycin-1.11   | 5/110 | $2.08 \times 10^{-3}$ | $1.43 \times 10^{-2}$ |
| LJP006 MCF7 24H-geldanamycin-0.04     | 3/33  | $2.42 \times 10^{-3}$ | $1.63 \times 10^{-2}$ |
| LJP005 MDAMB231 3H-geldanamycin-1.11  | 3/34  | $2.64 \times 10^{-3}$ | $1.75 \times 10^{-2}$ |
| LJP006 MDAMB231 3H-geldanamycin-3.33  | 3/34  | $2.64 \times 10^{-3}$ | $1.75 \times 10^{-2}$ |
| LJP005 MCF10A 24H-geldanamycin-0.04   | 5/119 | $2.93 \times 10^{-3}$ | $1.90 \times 10^{-2}$ |
| CPC006 SNUC4 6H-geldanamycin-10.0     | 4/75  | $3.30 \times 10^{-3}$ | $2.10 \times 10^{-2}$ |
| LJP006 HT29 24H-geldanamycin-0.37     | 3/37  | $3.37 \times 10^{-3}$ | $2.13 \times 10^{-2}$ |
| LJP005 MDAMB231 3H-geldanamycin-0.04  | 3/38  | $3.64 \times 10^{-3}$ | $2.27 \times 10^{-2}$ |
| LJP005 MDAMB231 3H-geldanamycin-10    | 3/38  | $3.64 \times 10^{-3}$ | $2.27 \times 10^{-2}$ |
| LJP006 MCF10A 24H-geldanamycin-1.11   | 5/129 | $4.14 \times 10^{-3}$ | $2.52 \times 10^{-2}$ |
| LJP005 MCF7 24H-geldanamycin-1.11     | 5/130 | $4.27 \times 10^{-3}$ | $2.58 \times 10^{-2}$ |
| LJP006 MCF10A 24H-geldanamycin-3.33   | 5/130 | $4.27 \times 10^{-3}$ | $2.58 \times 10^{-2}$ |
| LJP006 HCC515 24H-geldanamycin-10     | 4/83  | $4.74 \times 10^{-3}$ | $2.81 \times 10^{-2}$ |
| LJP006 HME1 3H-geldanamycin-0.12      | 3/42  | $4.83 \times 10^{-3}$ | $2.84 \times 10^{-2}$ |
| LJP006 LNCAP 3H-geldanamycin-1.11     | 3/43  | $5.16 \times 10^{-3}$ | $2.99 \times 10^{-2}$ |
| CPC006 NCIH1694 6H-geldanamycin-10.0  | 3/44  | $5.51 \times 10^{-3}$ | $3.17 \times 10^{-2}$ |
| LJP006 HME1 3H-geldanamycin-0.37      | 3/44  | $5.51 \times 10^{-3}$ | $3.16 \times 10^{-2}$ |
| LJP005 HS578T 24H-geldanamycin-0.37   | 4/88  | $5.83 \times 10^{-3}$ | $3.31 \times 10^{-2}$ |
| CPC006 THP1 6H-geldanamycin-10.0      | 4/90  | $6.31 \times 10^{-3}$ | $3.51 \times 10^{-2}$ |
| CPC013 A549 6H-geldanamycin-10.0      | 4/93  | $7.08 \times 10^{-3}$ | $3.84 \times 10^{-2}$ |
| LJP005 PC3 24H-geldanamycin-1.11      | 4/93  | $7.08 \times 10^{-3}$ | $3.84 \times 10^{-2}$ |
| CPC005 HT29 24H-geldanamycin-10.0     | 5/147 | $7.14 \times 10^{-3}$ | $3.87 \times 10^{-2}$ |
| CPC004 A375 6H-geldanamycin-10.0      | 3/49  | $7.44 \times 10^{-3}$ | $4.01 \times 10^{-2}$ |
| CPC004 VCAP 24H-geldanamycin-10.0     | 4/95  | $7.62 \times 10^{-3}$ | $4.07 \times 10^{-2}$ |
| CPC016 MCF7 24H-geldanamycin-10.0     | 5/150 | $7.76 \times 10^{-3}$ | $4.14 \times 10^{-2}$ |
| LJP005 HT29 24H-geldanamycin-3.33     | 5/150 | $7.76 \times 10^{-3}$ | $4.14 \times 10^{-2}$ |
| CPC018 ASC 24H-geldanamycin-10.0      | 3/51  | $8.31 \times 10^{-3}$ | $4.37 \times 10^{-2}$ |
| LJP006 BT20 24H-geldanamycin-0.04     | 3/51  | $8.31 \times 10^{-3}$ | $4.36 \times 10^{-2}$ |
| CPC006 U937 6H-geldanamycin-10.0      | 4/98  | $8.49 \times 10^{-3}$ | $4.44 \times 10^{-2}$ |
| LJP005 MDAMB231 3H-geldanamycin-0.37  | 3/52  | $8.77 \times 10^{-3}$ | $4.56 \times 10^{-2}$ |
| CPC005 A549 24H-geldanamycin-10.0     | 5/156 | $9.11 \times 10^{-3}$ | $4.70 \times 10^{-2}$ |
| LJP005 BT20 3H-geldanamycin-3.33      | 2/18  | $9.27 \times 10^{-3}$ | $4.75 \times 10^{-2}$ |

Table S26: Genes whose expression is altered by SARS-CoV-2-related viruses that significantly interact with the 163 genes selected by TD-based unsupervised FE and enriched by “Drug Perturbations from GEO up/down” in Enrichr

| Term                                                                     | Overlap | P-value                | Adjusted P-value       |
|--------------------------------------------------------------------------|---------|------------------------|------------------------|
| Drug Perturbations from GEO up                                           |         |                        |                        |
| MK-886 CID 3651377 human GSE3202 sample 3193                             | 54/368  | $3.90 \times 10^{-53}$ | $3.53 \times 10^{-50}$ |
| fluticasone 5311101 human GSE15823 sample 3090                           | 53/351  | $8.70 \times 10^{-53}$ | $3.94 \times 10^{-50}$ |
| 1-Naphthyl isothiocyanate 11080 rat GSE5509 sample 3568                  | 50/301  | $7.71 \times 10^{-52}$ | $2.33 \times 10^{-49}$ |
| quercetin 5280343 human GSE7259 sample 3416                              | 50/327  | $6.03 \times 10^{-50}$ | $1.36 \times 10^{-47}$ |
| N-METHYLFORMAMIDE 31254 rat GSE5509 sample 3570                          | 46/283  | $4.37 \times 10^{-47}$ | $7.93 \times 10^{-45}$ |
| NICKEL 935 human GSE6907 sample 3531                                     | 46/288  | $1.02 \times 10^{-46}$ | $1.54 \times 10^{-44}$ |
| apratoxin A 6326668 human GSE2742 sample 3070                            | 43/246  | $2.30 \times 10^{-45}$ | $2.98 \times 10^{-43}$ |
| quercetin 5280343 human GSE7259 sample 3415                              | 47/336  | $6.05 \times 10^{-45}$ | $6.85 \times 10^{-43}$ |
| sapphyrin PCI-2050 (1.25 &frac{14}{M}) 9855235 human GSE6400 sample 3101 | 48/367  | $1.71 \times 10^{-44}$ | $1.72 \times 10^{-42}$ |
| rosiglitazone DB00412 human GSE7035 sample 2810                          | 43/281  | $9.52 \times 10^{-43}$ | $8.63 \times 10^{-41}$ |
| Drug Perturbations from GEO down                                         |         |                        |                        |
| gatifloxacin 5379 human GSE9166 sample 2626                              | 48/266  | $1.61 \times 10^{-51}$ | $1.46 \times 10^{-48}$ |
| atorvastatin DB01076 human GSE2450 sample 2484                           | 46/250  | $1.02 \times 10^{-49}$ | $4.62 \times 10^{-47}$ |
| bexarotene DB00307 human GSE12791 sample 2681                            | 46/253  | $1.84 \times 10^{-49}$ | $5.54 \times 10^{-47}$ |
| clinafloxacin 60063 human GSE9166 sample 2625                            | 55/470  | $1.30 \times 10^{-48}$ | $2.95 \times 10^{-46}$ |
| motexafin gadolinium (12 h) DB05428 human GSE2189 sample 3127            | 48/320  | $1.89 \times 10^{-47}$ | $3.41 \times 10^{-45}$ |
| BPDE 41322 human GSE19510 sample 3379                                    | 47/300  | $2.36 \times 10^{-47}$ | $3.55 \times 10^{-45}$ |
| trovafloxacin 62959 human GSE9166 sample 2629                            | 53/459  | $1.98 \times 10^{-46}$ | $2.55 \times 10^{-44}$ |
| HYPOCHLOROUS ACID 24341 human GSE11630 sample 3199                       | 40/204  | $2.85 \times 10^{-44}$ | $3.21 \times 10^{-42}$ |
| trovafloxacin DB00685 human GSE9166 sample 3036                          | 51/451  | $4.05 \times 10^{-44}$ | $4.06 \times 10^{-42}$ |
| doxycycline DB00254 human GSE2624 sample 3077                            | 48/391  | $3.82 \times 10^{-43}$ | $3.45 \times 10^{-41}$ |

Table S27: Genes whose expression is altered by SARS-CoV-2-related viruses that significantly interact with the 163 genes selected by TD-based unsupervised FE and enriched by “Drug Matrix” in Enrichr

| Term                                                                    | Overlap | P-value                | Adjusted P-value       |
|-------------------------------------------------------------------------|---------|------------------------|------------------------|
| 2-Amino-4-Nitrophenol-625 mg/kg in CMC-Rat-Kidney-1d-up                 | 26/300  | $2.01 \times 10^{-19}$ | $1.59 \times 10^{-15}$ |
| Allyl Alcohol-32 mg/kg in Saline-Rat-Liver-1d-up                        | 25/291  | $1.30 \times 10^{-18}$ | $5.12 \times 10^{-15}$ |
| Meloxicam-33 mg/kg in Corn Oil-Rat-Kidney-5d-up                         | 23/261  | $1.96 \times 10^{-17}$ | $5.14 \times 10^{-14}$ |
| Lipopolysaccharide E. Coli O55:B5-1.25 mg/kg in Saline-Rat-Kidney-1d-up | 24/295  | $2.36 \times 10^{-17}$ | $4.64 \times 10^{-14}$ |
| 44'-Methylenedianiline-81 mg/kg in Corn Oil-Rat-Liver-3d-up             | 25/333  | $3.27 \times 10^{-17}$ | $5.16 \times 10^{-14}$ |
| Gentamicin-40 mg/kg in Saline-Rat-Kidney-14d-up                         | 24/309  | $6.83 \times 10^{-17}$ | $8.96 \times 10^{-14}$ |
| Lead(IV) Acetate-600 mg/kg in Saline-Rat-Kidney-5d-up                   | 24/309  | $6.83 \times 10^{-17}$ | $7.68 \times 10^{-14}$ |
| Dibromochloromethane-325 mg/kg in CMC-Rat-Kidney-3d-up                  | 24/312  | $8.51 \times 10^{-17}$ | $8.38 \times 10^{-14}$ |
| Allopurinol-175 mg/kg in Corn Oil-Rat-Kidney-3d-up                      | 24/329  | $2.84 \times 10^{-16}$ | $2.49 \times 10^{-13}$ |
| Benzyl Acetate-1868 mg/kg in CMC-Rat-Kidney-3d-up                       | 24/330  | $3.05 \times 10^{-16}$ | $2.40 \times 10^{-13}$ |

Table S28: List of *in silico* screened drugs [3] whose target genes were also enriched in the 163 genes selected by TD-based unsupervised FE.

| Term                                              | Overlap | P-value                | Adjusted P-value       |
|---------------------------------------------------|---------|------------------------|------------------------|
| Drug Perturbations from GEO up                    |         |                        |                        |
| doxycycline DB00254 human GSE2624 sample 3076     | 38/272  | $3.93 \times 10^{-36}$ | $1.32 \times 10^{-34}$ |
| doxycycline DB00254 human GSE2624 sample 3075     | 28/242  | $2.49 \times 10^{-24}$ | $2.02 \times 10^{-23}$ |
| doxycycline DB00254 human GSE2624 sample 3077     | 23/209  | $1.30 \times 10^{-19}$ | $6.43 \times 10^{-19}$ |
| doxycycline DB00254 mouse GSE29848 sample 3208    | 25/291  | $1.30 \times 10^{-18}$ | $5.84 \times 10^{-18}$ |
| doxycycline DB00254 mouse GSE29848 sample 3209    | 24/267  | $2.35 \times 10^{-18}$ | $1.03 \times 10^{-17}$ |
| doxycycline DB00254 human GSE2624 sample 3074     | 16/175  | $1.07 \times 10^{-12}$ | $2.89 \times 10^{-12}$ |
| doxycycline DB00254 mouse GSE29848 sample 3207    | 17/225  | $4.54 \times 10^{-12}$ | $1.16 \times 10^{-11}$ |
| ascorbic acid 54670067 human GSE11919 sample 3190 | 15/313  | $4.42 \times 10^{-8}$  | $8.64 \times 10^{-8}$  |
| isotretinoin DB00982 human GSE10432 sample 2772   | 19/308  | $8.45 \times 10^{-12}$ | $2.10 \times 10^{-11}$ |
| isotretinoin 5282379 human GSE10433 sample 2498   | 10/245  | $3.39 \times 10^{-5}$  | $5.51 \times 10^{-5}$  |
| pioglitazone DB01132 rat GSE21329 sample 2843     | 40/400  | $3.44 \times 10^{-32}$ | $7.08 \times 10^{-31}$ |
| pioglitazone DB01132 rat GSE21329 sample 2842     | 20/349  | $8.84 \times 10^{-12}$ | $2.18 \times 10^{-11}$ |
| pioglitazone 4829 mouse GSE1458 sample 2587       | 19/318  | $1.47 \times 10^{-11}$ | $3.55 \times 10^{-11}$ |
| pioglitazone DB01132 rat GSE20219 sample 2794     | 18/292  | $3.13 \times 10^{-11}$ | $7.40 \times 10^{-11}$ |
| pioglitazone DB01132 human GSE8157 sample 2796    | 13/331  | $3.36 \times 10^{-6}$  | $5.89 \times 10^{-6}$  |
| pioglitazone DB01132 rat GSE21329 sample 2841     | 11/279  | $1.88 \times 10^{-5}$  | $3.11 \times 10^{-5}$  |
| pioglitazone DB01132 rat GSE20219 sample 2795     | 9/330   | $1.58 \times 10^{-3}$  | $2.31 \times 10^{-3}$  |
| Drug Perturbations from GEO down                  |         |                        |                        |
| doxycycline DB00254 human GSE2624 sample 3077     | 48/391  | $3.82 \times 10^{-43}$ | $3.45 \times 10^{-41}$ |
| doxycycline DB00254 human GSE2624 sample 3074     | 39/425  | $6.14 \times 10^{-30}$ | $9.09 \times 10^{-29}$ |
| doxycycline DB00254 human GSE2624 sample 3076     | 30/328  | $5.30 \times 10^{-23}$ | $4.02 \times 10^{-22}$ |
| doxycycline DB00254 human GSE2624 sample 3075     | 27/358  | $1.40 \times 10^{-18}$ | $6.83 \times 10^{-18}$ |
| doxycycline DB00254 mouse GSE29848 sample 3207    | 21/375  | $3.98 \times 10^{-12}$ | $1.21 \times 10^{-11}$ |
| doxycycline DB00254 mouse GSE29848 sample 3208    | 16/309  | $5.14 \times 10^{-9}$  | $1.21 \times 10^{-8}$  |
| doxycycline DB00254 mouse GSE29848 sample 3209    | 14/333  | $6.21 \times 10^{-7}$  | $1.28 \times 10^{-6}$  |
| ascorbic acid 54670067 human GSE11919 sample 3190 | 40/287  | $5.09 \times 10^{-38}$ | $1.84 \times 10^{-36}$ |
| isotretinoin DB00982 human GSE10432 sample 2772   | 7/292   | $1.02 \times 10^{-2}$  | $1.57 \times 10^{-2}$  |
| pioglitazone DB01132 rat GSE21329 sample 2841     | 43/321  | $3.57 \times 10^{-40}$ | $1.90 \times 10^{-38}$ |
| pioglitazone 4829 mouse GSE1458 sample 2587       | 24/282  | $8.34 \times 10^{-18}$ | $3.77 \times 10^{-17}$ |
| pioglitazone DB01132 rat GSE21329 sample 2842     | 18/251  | $2.50 \times 10^{-12}$ | $7.64 \times 10^{-12}$ |
| pioglitazone DB01132 rat GSE20219 sample 2794     | 17/308  | $6.28 \times 10^{-10}$ | $1.62 \times 10^{-9}$  |
| pioglitazone DB01132 human GSE8157 sample 2796    | 14/269  | $4.58 \times 10^{-8}$  | $1.02 \times 10^{-7}$  |
| pioglitazone DB01132 rat GSE20219 sample 2795     | 12/270  | $2.29 \times 10^{-6}$  | $4.52 \times 10^{-6}$  |
| pioglitazone DB01132 rat GSE21329 sample 2843     | 7/200   | $1.29 \times 10^{-3}$  | $2.14 \times 10^{-3}$  |
| tibolone 444008 human GSE12446 sample 3204        | 30/313  | $1.34 \times 10^{-23}$ | $1.14 \times 10^{-22}$ |

Table S29: List of *in silico* screened drugs [2] whose target genes are also among the 163 genes selected by TD based unsupervised FE.

| Term                                         | Overlap | P-value                | Adjusted P-value       |
|----------------------------------------------|---------|------------------------|------------------------|
| Drug Perturbations from GEO up               |         |                        |                        |
| quercetin 5280343 human GSE7259 sample 3416  | 50/327  | $6.03 \times 10^{-50}$ | $1.36 \times 10^{-47}$ |
| quercetin 5280343 human GSE7259 sample 3415  | 47/336  | $6.05 \times 10^{-45}$ | $6.85 \times 10^{-43}$ |
| quercetin 5280343 rat GSE7479 sample 3409    | 38/394  | $5.73 \times 10^{-30}$ | $9.80 \times 10^{-29}$ |
| quercetin 5280343 human GSE13899 sample 3182 | 19/307  | $7.99 \times 10^{-12}$ | $1.99 \times 10^{-11}$ |
| quercetin DB04216 mouse GSE38136 sample 3436 | 17/297  | $3.59 \times 10^{-10}$ | $7.85 \times 10^{-10}$ |
| quercetin DB04216 mouse GSE38141 sample 3435 | 16/280  | $1.25 \times 10^{-9}$  | $2.67 \times 10^{-9}$  |
| quercetin DB04216 mouse GSE38136 sample 3438 | 15/254  | $2.69 \times 10^{-9}$  | $5.66 \times 10^{-9}$  |
| quercetin DB04216 mouse GSE38067 sample 3440 | 13/227  | $4.62 \times 10^{-8}$  | $9.01 \times 10^{-8}$  |
| quercetin DB04216 mouse GSE38136 sample 3437 | 16/472  | $1.66 \times 10^{-6}$  | $2.96 \times 10^{-6}$  |
| quercetin DB04216 mouse GSE38067 sample 3441 | 7/114   | $4.16 \times 10^{-5}$  | $6.73 \times 10^{-5}$  |
| quercetin DB04216 mouse GSE4262 sample 3428  | 11/360  | $1.85 \times 10^{-4}$  | $2.86 \times 10^{-4}$  |
| quercetin DB04216 mouse GSE4262 sample 3429  | 8/229   | $5.94 \times 10^{-4}$  | $8.90 \times 10^{-4}$  |
| quercetin DB04216 mouse GSE4262 sample 3427  | 9/360   | $2.84 \times 10^{-3}$  | $4.06 \times 10^{-3}$  |
| quercetin DB04216 mouse GSE4262 sample 3433  | 8/323   | $5.09 \times 10^{-3}$  | $7.12 \times 10^{-3}$  |
| quercetin DB04216 human GSE15162 sample 3444 | 7/323   | $1.69 \times 10^{-2}$  | $2.25 \times 10^{-2}$  |
| quercetin DB04216 mouse GSE4262 sample 3434  | 7/324   | $1.71 \times 10^{-2}$  | $2.27 \times 10^{-2}$  |
| Drug Perturbations from GEO down             |         |                        |                        |
| quercetin DB04216 mouse GSE38067 sample 3441 | 35/486  | $2.68 \times 10^{-23}$ | $2.11 \times 10^{-22}$ |
| quercetin 5280343 human GSE13899 sample 3182 | 28/293  | $5.05 \times 10^{-22}$ | $3.40 \times 10^{-21}$ |
| quercetin 5280343 rat GSE7479 sample 3409    | 16/206  | $1.31 \times 10^{-11}$ | $3.90 \times 10^{-11}$ |
| quercetin DB04216 mouse GSE38141 sample 3435 | 17/320  | $1.13 \times 10^{-9}$  | $2.79 \times 10^{-9}$  |
| quercetin DB04216 mouse GSE38136 sample 3436 | 16/303  | $3.89 \times 10^{-9}$  | $9.26 \times 10^{-9}$  |
| quercetin DB04216 mouse GSE38067 sample 3440 | 15/373  | $4.27 \times 10^{-7}$  | $8.83 \times 10^{-7}$  |
| quercetin 5280343 human GSE7259 sample 3415  | 12/264  | $1.81 \times 10^{-6}$  | $3.59 \times 10^{-6}$  |
| quercetin DB04216 mouse GSE38136 sample 3438 | 13/346  | $5.44 \times 10^{-6}$  | $1.05 \times 10^{-5}$  |
| quercetin DB04216 mouse GSE38136 sample 3437 | 8/128   | $1.02 \times 10^{-5}$  | $1.92 \times 10^{-5}$  |
| quercetin DB04216 mouse GSE4262 sample 3430  | 11/312  | $5.22 \times 10^{-5}$  | $9.45 \times 10^{-5}$  |
| quercetin DB04216 mouse GSE4262 sample 3431  | 10/348  | $5.87 \times 10^{-4}$  | $9.96 \times 10^{-4}$  |
| quercetin 5280343 human GSE7259 sample 3416  | 8/273   | $1.83 \times 10^{-3}$  | $3.02 \times 10^{-3}$  |
| quercetin DB04216 mouse GSE4262 sample 3428  | 7/240   | $3.59 \times 10^{-3}$  | $5.74 \times 10^{-3}$  |
| quercetin DB04216 mouse GSE4262 sample 3429  | 7/371   | $3.27 \times 10^{-2}$  | $4.73 \times 10^{-2}$  |

Table S30: Five Drugs ranked within top 10 in the previous study but not in the present study in “DrugMatrix” category in Enrichr. They were still significantly enriched for the selected 163 genes. If there were more than ten hits, they were omitted.

| Term                                                    | Overlap | P-value                | Adjusted P-value       |
|---------------------------------------------------------|---------|------------------------|------------------------|
| Primaquine-45 mg/kg in CMC-Rat-Liver-5d-up              | 18/315  | $1.09 \times 10^{-10}$ | $3.34 \times 10^{-9}$  |
| Primaquine-45 mg/kg in CMC-Rat-Liver-1d-up              | 15/337  | $1.16 \times 10^{-7}$  | $7.37 \times 10^{-7}$  |
| Primaquine-45 mg/kg in CMC-Rat-Liver-3d-up              | 14/316  | $3.31 \times 10^{-7}$  | $1.66 \times 10^{-6}$  |
| Primaquine-45 mg/kg in CMC-Rat-Liver-3d-dn              | 9/284   | $5.51 \times 10^{-4}$  | $8.62 \times 10^{-4}$  |
| Primaquine-45 mg/kg in CMC-Rat-Liver-5d-dn              | 7/285   | $8.98 \times 10^{-3}$  | $1.06 \times 10^{-2}$  |
| Cytarabine-487 mg/kg in Saline-Rat-Bone marrow-1d-up    | 17/326  | $1.49 \times 10^{-9}$  | $2.47 \times 10^{-8}$  |
| Cytarabine-23 mg/kg in Saline-Rat-Liver-0.25d-up        | 16/313  | $6.17 \times 10^{-9}$  | $7.17 \times 10^{-8}$  |
| Cytarabine-487 mg/kg in Saline-Rat-Liver-1d-dn          | 14/237  | $9.28 \times 10^{-9}$  | $9.81 \times 10^{-8}$  |
| Cytarabine-23 mg/kg in Saline-Rat-Bone marrow-0.25d-up  | 17/385  | $1.79 \times 10^{-8}$  | $1.66 \times 10^{-7}$  |
| Cytarabine-23 mg/kg in Saline-Rat-Spleen-3d-up          | 15/299  | $2.42 \times 10^{-8}$  | $2.12 \times 10^{-7}$  |
| Cytarabine-487 mg/kg in Saline-Rat-Liver-5d-dn          | 14/291  | $1.21 \times 10^{-7}$  | $7.59 \times 10^{-7}$  |
| Cytarabine-23 mg/kg in Saline-Rat-Liver-5d-dn           | 14/307  | $2.33 \times 10^{-7}$  | $1.26 \times 10^{-6}$  |
| Cytarabine-487 mg/kg in Saline-Rat-Kidney-5d-dn         | 14/319  | $3.71 \times 10^{-7}$  | $1.84 \times 10^{-6}$  |
| Cytarabine-487 mg/kg in Saline-Rat-Kidney-3d-dn         | 14/327  | $4.99 \times 10^{-7}$  | $2.35 \times 10^{-6}$  |
| Cytarabine-487 mg/kg in Saline-Rat-Spleen-1d-up         | 14/329  | $5.37 \times 10^{-7}$  | $2.49 \times 10^{-6}$  |
| Cytarabine-23 mg/kg in Saline-Rat-Spleen-0.25d-up       | 14/344  | $9.14 \times 10^{-7}$  | $3.83 \times 10^{-6}$  |
| (additional 31 hits with less significance are omitted) |         |                        |                        |
| Pyrogallol-1000 mg/kg in Water-Rat-Liver-5d-up          | 14/304  | $2.07 \times 10^{-7}$  | $1.14 \times 10^{-6}$  |
| Pyrogallol-1000 mg/kg in Water-Rat-Liver-1d-up          | 15/409  | $1.35 \times 10^{-6}$  | $5.23 \times 10^{-6}$  |
| Pyrogallol-1000 mg/kg in Water-Rat-Liver-5d-dn          | 12/296  | $5.88 \times 10^{-6}$  | $1.76 \times 10^{-5}$  |
| Pyrogallol-1000 mg/kg in Water-Rat-Liver-3d-up          | 13/349  | $5.97 \times 10^{-6}$  | $1.78 \times 10^{-5}$  |
| Pyrogallol-1000 mg/kg in Water-Rat-Liver-3d-dn          | 7/251   | $4.59 \times 10^{-3}$  | $5.69 \times 10^{-3}$  |
| Pyrogallol-1000 mg/kg in Water-Rat-Liver-1d-dn          | 5/191   | $2.03 \times 10^{-2}$  | $2.26 \times 10^{-2}$  |
| Catechol-195 mg/kg in Saline-Rat-Liver-0.25d-up         | 19/290  | $2.94 \times 10^{-12}$ | $2.41 \times 10^{-10}$ |
| Catechol-40 mg/kg in Saline-Rat-Liver-0.25d-up          | 19/305  | $7.13 \times 10^{-12}$ | $4.16 \times 10^{-10}$ |
| Catechol-195 mg/kg in Saline-Rat-Bone marrow-1d-dn      | 16/305  | $4.27 \times 10^{-9}$  | $5.49 \times 10^{-8}$  |
| Catechol-40 mg/kg in Saline-Rat-Kidney-0.25d-dn         | 16/319  | $8.08 \times 10^{-9}$  | $8.82 \times 10^{-8}$  |
| Catechol-40 mg/kg in Saline-Rat-Kidney-3d-dn            | 15/294  | $1.93 \times 10^{-8}$  | $1.77 \times 10^{-7}$  |
| Catechol-40 mg/kg in Saline-Rat-Bone marrow-0.25d-dn    | 15/306  | $3.28 \times 10^{-8}$  | $2.67 \times 10^{-7}$  |
| Catechol-40 mg/kg in Saline-Rat-Bone marrow-1d-dn       | 15/307  | $3.43 \times 10^{-8}$  | $2.76 \times 10^{-7}$  |
| Catechol-195 mg/kg in Saline-Rat-Spleen-1d-up           | 15/320  | $5.91 \times 10^{-8}$  | $4.31 \times 10^{-7}$  |
| Catechol-195 mg/kg in Saline-Rat-Kidney-5d-dn           | 14/281  | $7.87 \times 10^{-8}$  | $5.39 \times 10^{-7}$  |
| Catechol-195 mg/kg in Saline-Rat-Bone marrow-5d-dn      | 14/310  | $2.62 \times 10^{-7}$  | $1.38 \times 10^{-6}$  |
| (additional 27 hits with less significance are omitted) |         |                        |                        |
| Neomycin-877 mg/kg in Corn Oil-Rat-Kidney-1d-dn         | 14/264  | $3.62 \times 10^{-8}$  | $2.88 \times 10^{-7}$  |
| Neomycin-877 mg/kg in Corn Oil-Rat-Liver-5d-up          | 14/323  | $4.31 \times 10^{-7}$  | $2.08 \times 10^{-6}$  |
| Neomycin-56 mg/kg in Corn Oil-Rat-Kidney-0.25d-dn       | 12/256  | $1.31 \times 10^{-6}$  | $5.12 \times 10^{-6}$  |
| Neomycin-877 mg/kg in Corn Oil-Rat-Kidney-3d-up         | 13/311  | $1.69 \times 10^{-6}$  | $6.23 \times 10^{-6}$  |
| Neomycin-56 mg/kg in Corn Oil-Rat-Kidney-5d-dn          | 12/270  | $2.29 \times 10^{-6}$  | $7.99 \times 10^{-6}$  |
| Neomycin-56 mg/kg in Corn Oil-Rat-Liver-5d-up           | 12/279  | $3.21 \times 10^{-6}$  | $1.06 \times 10^{-5}$  |
| Neomycin-56 mg/kg in Corn Oil-Rat-Kidney-3d-dn          | 11/233  | $3.43 \times 10^{-6}$  | $1.12 \times 10^{-5}$  |
| Neomycin-877 mg/kg in Corn Oil-Rat-Kidney-3d-dn         | 12/289  | $4.60 \times 10^{-6}$  | $1.44 \times 10^{-5}$  |
| Neomycin-877 mg/kg in Corn Oil-Rat-Liver-0.25d-dn       | 12/296  | $5.88 \times 10^{-6}$  | $1.76 \times 10^{-5}$  |
| Neomycin-56 mg/kg in Corn Oil-Rat-Liver-3d-dn           | 12/309  | $9.07 \times 10^{-6}$  | $2.50 \times 10^{-5}$  |
| (additional 20 hits with less significance are omitted) |         |                        |                        |



Table S31: Four Drugs ranked within top 10 in the previous study but not in the present study in “Drug Pert from GEO up/down” category in Enrichr. They were still significantly enriched toward the selected 163 genes.

| Term                                           | Overlap | P-value                | Adjusted P-value       |
|------------------------------------------------|---------|------------------------|------------------------|
| Drug Perturbations from GEO up                 |         |                        |                        |
| fenretinide 5288209 rat GSE3952 sample 3561    | 35/397  | $2.98 \times 10^{-26}$ | $2.81 \times 10^{-25}$ |
| fenretinide 5288209 rat GSE3952 sample 3559    | 7/160   | $3.45 \times 10^{-4}$  | $5.30 \times 10^{-4}$  |
| pioglitazone DB01132 rat GSE21329 sample 2843  | 40/400  | $3.44 \times 10^{-32}$ | $7.08 \times 10^{-31}$ |
| pioglitazone DB01132 rat GSE21329 sample 2842  | 20/349  | $8.84 \times 10^{-12}$ | $2.18 \times 10^{-11}$ |
| pioglitazone 4829 mouse GSE1458 sample 2587    | 19/318  | $1.47 \times 10^{-11}$ | $3.55 \times 10^{-11}$ |
| pioglitazone DB01132 rat GSE20219 sample 2794  | 18/292  | $3.13 \times 10^{-11}$ | $7.40 \times 10^{-11}$ |
| pioglitazone DB01132 human GSE8157 sample 2796 | 13/331  | $3.36 \times 10^{-6}$  | $5.89 \times 10^{-6}$  |
| pioglitazone DB01132 rat GSE21329 sample 2841  | 11/279  | $1.88 \times 10^{-5}$  | $3.11 \times 10^{-5}$  |
| pioglitazone DB01132 rat GSE20219 sample 2795  | 9/330   | $1.58 \times 10^{-3}$  | $2.31 \times 10^{-3}$  |
| decitabine DB01262 human GSE29077 sample 2546  | 31/243  | $3.22 \times 10^{-28}$ | $3.99 \times 10^{-27}$ |
| decitabine DB01262 human GSE29077 sample 2538  | 31/263  | $3.84 \times 10^{-27}$ | $4.05 \times 10^{-26}$ |
| decitabine DB01262 human GSE9118 sample 2703   | 31/271  | $9.77 \times 10^{-27}$ | $9.73 \times 10^{-26}$ |
| decitabine DB01262 human GSE29077 sample 2539  | 26/279  | $3.22 \times 10^{-20}$ | $1.69 \times 10^{-19}$ |
| decitabine 451668 mouse GSE4768 sample 3103    | 25/251  | $3.55 \times 10^{-20}$ | $1.85 \times 10^{-19}$ |
| decitabine 451668 mouse GSE4768 sample 3105    | 26/287  | $6.59 \times 10^{-20}$ | $3.36 \times 10^{-19}$ |
| decitabine DB01262 human GSE29077 sample 2540  | 19/300  | $5.34 \times 10^{-12}$ | $1.35 \times 10^{-11}$ |
| decitabine DB01262 human GSE29077 sample 2547  | 19/304  | $6.73 \times 10^{-12}$ | $1.69 \times 10^{-11}$ |
| decitabine DB01262 human GSE29077 sample 2548  | 19/316  | $1.32 \times 10^{-11}$ | $3.21 \times 10^{-11}$ |
| decitabine 451668 mouse GSE4768 sample 3108    | 12/374  | $5.91 \times 10^{-5}$  | $9.43 \times 10^{-5}$  |
| trogliatone DB00197 rat GSE21329 sample 2833   | 36/408  | $5.13 \times 10^{-27}$ | $5.34 \times 10^{-26}$ |
| trogliatone DB00197 rat GSE21329 sample 2834   | 28/198  | $8.28 \times 10^{-27}$ | $8.42 \times 10^{-26}$ |
| trogliatone 5591 mouse GSE1458 sample 2589     | 26/305  | $3.05 \times 10^{-19}$ | $1.45 \times 10^{-18}$ |
| trogliatone DB00197 rat GSE21329 sample 2832   | 10/245  | $3.39 \times 10^{-5}$  | $5.52 \times 10^{-5}$  |
| Drug Perturbations from GEO down               |         |                        |                        |
| fenretinide 5288209 rat GSE3952 sample 3559    | 38/440  | $3.49 \times 10^{-28}$ | $4.56 \times 10^{-27}$ |
| fenretinide 5288209 rat GSE3952 sample 3561    | 22/203  | $1.18 \times 10^{-18}$ | $5.84 \times 10^{-18}$ |
| pioglitazone DB01132 rat GSE21329 sample 2841  | 43/321  | $3.57 \times 10^{-40}$ | $1.90 \times 10^{-38}$ |
| pioglitazone 4829 mouse GSE1458 sample 2587    | 24/282  | $8.34 \times 10^{-18}$ | $3.77 \times 10^{-17}$ |
| pioglitazone DB01132 rat GSE21329 sample 2842  | 18/251  | $2.50 \times 10^{-12}$ | $7.64 \times 10^{-12}$ |
| pioglitazone DB01132 rat GSE20219 sample 2794  | 17/308  | $6.28 \times 10^{-10}$ | $1.62 \times 10^{-9}$  |
| pioglitazone DB01132 human GSE8157 sample 2796 | 14/269  | $4.58 \times 10^{-8}$  | $1.02 \times 10^{-7}$  |
| pioglitazone DB01132 rat GSE20219 sample 2795  | 12/270  | $2.29 \times 10^{-6}$  | $4.52 \times 10^{-6}$  |
| pioglitazone DB01132 rat GSE21329 sample 2843  | 7/200   | $1.29 \times 10^{-3}$  | $2.14 \times 10^{-3}$  |
| decitabine DB01262 human GSE29077 sample 2540  | 44/300  | $6.35 \times 10^{-43}$ | $5.21 \times 10^{-41}$ |
| decitabine DB01262 human GSE29077 sample 2539  | 41/321  | $2.15 \times 10^{-37}$ | $7.19 \times 10^{-36}$ |
| decitabine 451668 mouse GSE4768 sample 3108    | 35/226  | $6.98 \times 10^{-35}$ | $1.91 \times 10^{-33}$ |
| decitabine DB01262 human GSE29077 sample 2538  | 37/337  | $3.06 \times 10^{-31}$ | $5.22 \times 10^{-30}$ |
| decitabine DB01262 human GSE9118 sample 2703   | 29/329  | $8.47 \times 10^{-22}$ | $5.54 \times 10^{-21}$ |
| decitabine DB01262 human GSE29077 sample 2548  | 25/284  | $7.22 \times 10^{-19}$ | $3.62 \times 10^{-18}$ |
| decitabine DB01262 human GSE29077 sample 2547  | 21/296  | $4.08 \times 10^{-14}$ | $1.42 \times 10^{-13}$ |
| decitabine 451668 mouse GSE4768 sample 3105    | 20/313  | $1.20 \times 10^{-12}$ | $3.76 \times 10^{-12}$ |
| decitabine 451668 mouse GSE4768 sample 3103    | 16/349  | $2.85 \times 10^{-8}$  | $6.43 \times 10^{-8}$  |
| decitabine DB01262 human GSE29077 sample 2546  | 14/357  | $1.42 \times 10^{-6}$  | $2.85 \times 10^{-6}$  |
| trogliatone DB00197 rat GSE21329 sample 2832   | 37/355  | $2.09 \times 10^{-30}$ | $3.31 \times 10^{-29}$ |
| trogliatone 5591 mouse GSE1458 sample 2589     | 17/295  | $3.24 \times 10^{-10}$ | $8.55 \times 10^{-10}$ |
| trogliatone DB00197 rat GSE21329 sample 2834   | 16/402  | $1.98 \times 10^{-7}$  | $4.20 \times 10^{-7}$  |
| trogliatone DB00197 rat GSE21329 sample 2833   | 11/192  | $5.16 \times 10^{-7}$  | $1.07 \times 10^{-6}$  |

Table S32: The number of human proteins reported to interact with listed SARS-CoV-2 proteins [1]

|                 |                      |                 |
|-----------------|----------------------|-----------------|
| SARS-CoV2 E     | SARS-CoV2 M          | SARS-CoV2 N     |
| 859             | 1245                 | 584             |
| SARS-CoV2 nsp1  | SARS-CoV2 nsp10      | SARS-CoV2 nsp11 |
| 592             | 443                  | 925             |
| SARS-CoV2 nsp12 | SARS-CoV2 nsp13      | SARS-CoV2 nsp14 |
| 620             | 994                  | 475             |
| SARS-CoV2 nsp15 | SARS-CoV2 nsp2       | SARS-CoV2 nsp4  |
| 559             | 918                  | 952             |
| SARS-CoV2 nsp5  | SARS-CoV2 nsp5_C145A | SARS-CoV2 nsp6  |
| 540             | 365                  | 1019            |
| SARS-CoV2 nsp7  | SARS-CoV2 nsp8       | SARS-CoV2 nsp9  |
| 893             | 1017                 | 684             |
| SARS-CoV2 orf10 | SARS-CoV2 orf3a      | SARS-CoV2 orf3b |
| 872             | 974                  | 753             |
| SARS-CoV2 orf6  | SARS-CoV2 orf7a      | SARS-CoV2 orf8  |
| 779             | 971                  | 1106            |
| SARS-CoV2 orf9b | SARS-CoV2 orf9c      | SARS-CoV2 Spike |
| 732             | 1462                 | 820             |

## References

- [1] Gordon, D.E., Jang, G.M., Bouhaddou, M., Xu, J., Obernier, K., O'Meara, M.J., Guo, J.Z., Swaney, D.L., Tummino, T.A., Huettenhain, R., Kaake, R.M., Richards, A.L., Tutuncuoglu, B., Foussard, H., Batra, J., Haas, K., Modak, M., Kim, M., Haas, P., Polacco, B.J., Braberg, H., Fabius, J.M., Eckhardt, M., Soucheray, M., Bennett, M.J., Cakir, M., McGregor, M.J., Li, Q., Naing, Z.Z.C., Zhou, Y., Peng, S., Kirby, I.T., Melnyk, J.E., Chorbha, J.S., Lou, K., Dai, S.A., Shen, W., Shi, Y., Zhang, Z., Barrio-Hernandez, I., Memon, D., Hernandez-Armenta, C., Mathy, C.J., Perica, T., Pilla, K.B., Ganesan, S.J., Saltzberg, D.J., Ramachandran, R., Liu, X., Rosenthal, S.B., Calviello, L., Venkataramanan, S., Liboy-Lugo, J., Lin, Y., Wankowicz, S.A., Bohn, M., Sharp, P.P., Trenker, R., Young, J.M., Caverio, D.A., Hiatt, J., Roth, T.L., Rathore, U., Subramanian, A., Noack, J., Hubert, M., Roesch, F., Vallet, T., Meyer, B., White, K.M., Miorin, L., Rosenberg, O.S., Verba, K.A., Agard, D., Ott, M., Emerman, M., Ruggero, D., García-Sastre, A., Jura, N., von Zastrow, M., Taunton, J., Ashworth, A., Schwartz, O., Vignuzzi, M., d'Enfert, C., Mukherjee, S., Jacobson, M., Malik, H.S., Fujimori, D.G., Ideker, T., Craik, C.S., Floor, S., Fraser, J.S., Gross, J., Sali, A., Kortemme, T., Beltrao, P., Shokat, K., Shoichet, B.K., Krogan, N.J., 2020. A SARS-CoV-2-human protein-protein interaction map reveals drug targets and potential drug-repurposing. *bioRxiv* URL: <https://www.biorxiv.org/content/early/2020/03/27/2020.03.22.002386>, doi:10.1101/2020.03.22.002386, arXiv:<https://www.biorxiv.org/content/early/2020/03/27/2020.03.22.002386.full>.
- [2] Ubani, A., Agwom, F., Shehu, N.Y., Luka, P., Umera, A., Umar, U., Omale, S., Nnadi, N.E., Aguiyi, J.C., 2020. Molecular docking analysis of some phytochemicals on two SARS-CoV-2 targets. *bioRxiv* URL: <https://www.biorxiv.org/content/early/2020/04/01/2020.03.31.017657>, doi:10.1101/2020.03.31.017657, arXiv:<https://www.biorxiv.org/content/early/2020/04/01/2020.03.31.017657>.
- [3] Wu, C., Liu, Y., Yang, Y., Zhang, P., Zhong, W., Wang, Y., Wang, Q., Xu, Y., Li, M., Li, X., Zheng, M., Chen, L., Li, H., 2020. Analysis of therapeutic targets for SARS-CoV-2 and discovery of potential drugs by computational methods. *Acta Pharmaceutica Sinica B* URL: <http://www.sciencedirect.com/science/article/pii/S2211383520302999>, doi:<https://doi.org/10.1016/j.apsb.2020.02.008>.

Table S33: Coincidence between 163 genes and human proteins whose numbers are reported in Table S32

| SARS-CoV-2 proteins  | P values               | Odds Ratio |
|----------------------|------------------------|------------|
| SARS-CoV2 E          | $6.55 \times 10^{-27}$ | 10.16      |
| SARS-CoV2 M          | $1.38 \times 10^{-26}$ | 8.42       |
| SARS-CoV2 N          | $4.61 \times 10^{-24}$ | 11.43      |
| SARS-CoV2 nsp1       | $1.06 \times 10^{-20}$ | 10.00      |
| SARS-CoV2 nsp10      | $3.40 \times 10^{-20}$ | 11.52      |
| SARS-CoV2 nsp11      | $1.13 \times 10^{-29}$ | 10.66      |
| SARS-CoV2 nsp12      | $4.87 \times 10^{-20}$ | 9.48       |
| SARS-CoV2 nsp13      | $6.04 \times 10^{-33}$ | 11.17      |
| SARS-CoV2 nsp14      | $1.75 \times 10^{-22}$ | 12.05      |
| SARS-CoV2 nsp15      | $1.85 \times 10^{-20}$ | 10.23      |
| SARS-CoV2 nsp2       | $4.81 \times 10^{-33}$ | 11.79      |
| SARS-CoV2 nsp4       | $5.79 \times 10^{-29}$ | 10.26      |
| SARS-CoV2 nsp5       | $3.78 \times 10^{-25}$ | 12.36      |
| SARS-CoV2 nsp5_C145A | $3.75 \times 10^{-17}$ | 11.39      |
| SARS-CoV2 nsp6       | $9.47 \times 10^{-26}$ | 9.00       |
| SARS-CoV2 nsp7       | $1.93 \times 10^{-29}$ | 10.81      |
| SARS-CoV2 nsp8       | $1.11 \times 10^{-29}$ | 10.14      |
| SARS-CoV2 nsp9       | $5.54 \times 10^{-29}$ | 12.24      |
| SARS-CoV2 orf10      | $5.29 \times 10^{-34}$ | 12.37      |
| SARS-CoV2 orf3a      | $2.06 \times 10^{-28}$ | 9.95       |
| SARS-CoV2 orf3b      | $1.89 \times 10^{-29}$ | 11.80      |
| SARS-CoV2 orf6       | $8.81 \times 10^{-26}$ | 10.37      |
| SARS-CoV2 orf7a      | $1.69 \times 10^{-28}$ | 10.00      |
| SARS-CoV2 orf8       | $5.94 \times 10^{-28}$ | 9.25       |
| SARS-CoV2 orf9b      | $6.54 \times 10^{-30}$ | 12.12      |
| SARS-CoV2 orf9c      | $1.11 \times 10^{-28}$ | 8.35       |
| SARS-CoV2 Spike      | $8.22 \times 10^{-26}$ | 10.08      |

Table S34: Number of experiments associated with adjusted  $P$ -values in various Enrichr categories for the drugs identified in another study[]

|                    | DrugMatrix | GEO down | GEO up | LINCS down | LINCS up |
|--------------------|------------|----------|--------|------------|----------|
| Mestranol          | 6          |          |        |            |          |
| Methotrexate       | 40         | 2        |        |            |          |
| Fluorouracil       | 4          | 4        | 6      | 1          |          |
| Hexestrol          | 4          |          |        |            |          |
| Mercaptopurine     | 17         |          |        |            |          |
| Paroxetine         | 10         |          |        | 1          |          |
| Vinblastine        | 17         |          |        | 1          | 3        |
| Phenylbutazone     | 6          |          |        |            |          |
| Naloxone           | 5          |          |        |            |          |
| Hydralazine        | 14         |          |        |            |          |
| Vinorelbine        | 13         |          |        |            | 1        |
| Carvedilol         | 20         |          |        |            | 1        |
| Colchicine         | 13         |          | 1      |            |          |
| Amitriptyline      | 13         |          |        | 1          |          |
| Epinephrine        | 17         |          |        |            |          |
| Dactinomycin       | 6          | 2        | 1      | 5          | 1        |
| Hydrocortisone     | 21         |          |        |            |          |
| Melatonin          | 7          |          |        |            |          |
| Methyltestosterone | 6          |          |        |            |          |
| Omeprazole         | 20         |          |        |            |          |
| Testosterone       | 12         |          | 1      |            |          |
| Oxymetholone       | 5          |          |        |            |          |
| Progesterone       | 20         | 2        | 2      |            |          |
| Permethrin         |            | 1        |        |            |          |
| Mesalazine         |            | 1        |        |            |          |
| Menadione          |            | 1        | 1      |            | 3        |
| Stanolone          |            | 1        | 2      |            |          |
| Methotrexate       |            |          | 1      |            |          |
| Sirolimus          |            |          |        | 47         | 50       |
| Cladribine         |            |          |        | 2          | 1        |
| Regorafenib        |            |          |        | 9          | 14       |
| Temsirolimus       |            |          |        | 1          |          |
| Quinacrine         |            |          |        | 1          | 3        |
