# Supplementary material for: A New Advanced <em>In silico</em> Drug Discovery Method for Novel Coronavirus (SARS-CoV-2) with Tensor Decomposition-based Unsupervised Feature Extraction
Source: Preprints.org preprint supplement (doi:10.20944/preprints202004.0524.v2), 2020-06-03
Supplement: Supplementary file 4 [file gene.xlsx]

## Sheet: Sheet1
1	ENO1
2	YBX1
3	DHCR24
4	JUN
5	RPL5
6	TXNIP
7	S100A6
8	S100A2
9	RPS27
10	FDPS
11	ATP1B1
12	GAS5
13	LAMC2
14	LAMB3
15	AKR1C2
16	VIM
17	ITGB1
18	DDIT4
19	PLAU
20	RPS24
21	IFIT2
22	SCD
23	LDHA
24	FADS2
25	FTH1
26	AHNAK
27	NEAT1
28	CFL1
29	GSTP1
30	HSPA8
31	GAPDH
32	TPI1
33	SLC38A2
34	AMIGO2
35	TUBA1B
36	KRT7
37	KRT81
38	KRT6A
39	KRT5
40	KRT8
41	KRT18
42	EIF4B
43	MYL6
44	NAP1L1
45	TXNRD1
46	OAS2
47	UBC
48	TPT1
49	NFKBIA
50	GPX2
51	SERPINA3
52	HSP90AA1
53	TNFAIP2
54	ANXA2
55	TPM1
56	RPL4
57	PKM
58	ALDOA
59	NQO1
60	SLC7A5
61	PFN1
62	EIF5A
63	RPL26
64	ALDH3A1
65	RPL23
66	STARD3
67	ERBB2
68	MIEN1
69	PSMD3
70	TOP2A
71	IGFBP4
72	KRT23
73	KRT19
74	EIF1
75	ITGA3
76	ABCC3
77	RNF213
78	ACTG1
79	P4HB
80	FASN
81	EEF2
82	C3
83	ICAM1
84	CALR
85	ACTN4
86	RPS19
87	PPP1R15A
88	FTL
89	RPL28
90	CRIM1
91	CALM2
92	SPTBN1
93	RPS27A
94	ANTXR1
95	MTHFD2
96	ITGAV
97	STAT1
98	PTMA
99	TGM2
100	CYP24A1
101	PMEPA1
102	LIF
103	H1F0
104	RPL3
105	ATF4
106	FLNB
107	DCBLD2
108	PLOD2
109	TIPARP
110	RPL9
111	FDCSP
112	CXCL5
113	EREG
114	SPP1
115	SLC7A11
116	RPS3A
117	RAI14
118	RPL37
119	ITGA2
120	TGFBI
121	NPM1
122	STC2
123	CPLX2
124	SQSTM1
125	TUBB
126	IER3
127	HMGA1
128	VEGFA
129	HSP90AB1
130	EEF1A1
131	CTGF
132	AKAP12
133	ACTB
134	HNRNPA2B1
135	PPIA
136	IGFBP3
137	ASNS
138	SERPINE1
139	NAMPT
140	AKR1B1
141	AKR1B10
142	LOXL2
143	RPS20
144	ASPH
145	TRAM1
146	RPL7
147	PABPC1
148	YWHAZ
149	RPS6
150	ALDH1A1
151	PSAT1
152	RPL12
153	LCN2
154	RPL7A
155	TUBB4B
156	TMSB4X
157	ACE2
158	SAT1
159	RPS4X
160	PGK1
161	RPL10
162	G6PD
163	CD24
